# Supplementary material
Source: PubMed Central journal article supplement (PMC4385968)
Supplement: tableS1.pdf [file tableS1.pdf]

**Table S1. Genes showing significantly different expression in summer granulosa cells**

**Genes showing reduced expression in summer granulosa cells**

| Probeset ID              | Gene Symbol            | Gene Description                                                                                         | Ratio |      |           | Probes found in     |
|--------------------------|------------------------|----------------------------------------------------------------------------------------------------------|-------|------|-----------|---------------------|
|                          |                        |                                                                                                          | Ctrl  | Summ | Ctrl:Summ |                     |
| Mmu.5409.1.S1_at         | TMEM106B               | transmembrane protein 106B                                                                               | 155   | 18   | 8.479     | transcripts         |
| MmugDNA.19043.1.S1_at    | SHISA2                 | shisa homolog 2 (Xenopus laevis)                                                                         | 2932  | 444  | 6.600     | genic&downstr. reg. |
| MmuMitochon.3.1.S1_s_at  | ND2                    | NADH dehydrogenase subunit 2                                                                             | 7886  | 1207 | 6.536     | transcripts         |
| MmugDNA.15046.1.S1_at    | HMCN1                  | hemicentin 1                                                                                             | 343   | 58   | 5.942     | transcripts         |
| MmuMitochon.6.1.S1_s_at  | ATP8                   | ATP synthase F0 subunit 8                                                                                | 2768  | 469  | 5.906     | transcripts         |
| MmuMitochon.10.1.S1_s_at | ND4L                   | NADH dehydrogenase subunit 4L                                                                            | 4125  | 740  | 5.574     | transcripts         |
| MmugDNA.32362.1.S1_at    | MAFB                   | v-maf musculoaponeurotic fibrosarcoma oncogene homolog B (avian)                                         | 224   | 44   | 5.113     | transcripts         |
| MmugDNA.34243.1.S1_at    | KCNAB1                 | potassium voltage-gated channel,shaker-related subfamily,beta member 1                                   | 249   | 51   | 4.867     | transcripts         |
| MmuSTS.2065.1.S1_x_at    | PYGL                   | phosphorylase,glycogen,liver                                                                             | 401   | 86   | 4.654     | transcripts         |
| MmugDNA.8704.1.S1_at     | STC2                   | stanniocalcin 2                                                                                          | 82    | 18   | 4.438     | transcripts         |
| Mmu.8081.1.S1_at         | AKR1B10 ///<br>AKR1B15 | aldo-keto reductase family 1, member B10 (aldose reductase) /// aldo-keto reductase family 1, member B15 | 121   | 27   | 4.400     | transcripts         |
| Mmu.6025.1.S1_at         | ---                    | ---                                                                                                      | 193   | 45   | 4.331     | ---                 |
| MmuSTS.2065.1.S1_at      | PYGL                   | phosphorylase,glycogen,liver                                                                             | 352   | 83   | 4.249     | transcripts         |
| MmugDNA.14019.1.S1_at    | FAM196A                | family with sequence similarity 196,member A                                                             | 401   | 95   | 4.220     | transcripts         |
| Mmu.8081.1.S1_x_at       | AKR1B10 ///<br>AKR1B15 | aldo-keto reductase family 1, member B10 (aldose reductase) /// aldo-keto reductase family 1, member B15 | 127   | 30   | 4.207     | transcripts         |
| MmugDNA.23693.1.S1_at    | PYGL                   | phosphorylase,glycogen,liver                                                                             | 77    | 19   | 4.060     | transcripts         |
| MmuSTS.1929.1.S1_at      | MYCN                   | v-myc myelocytomatosis viral related oncogene,neuroblastoma derived (avian)                              | 287   | 72   | 3.985     | transcripts         |
| MmugDNA.27799.1.S1_at    | C8orf47                | chromosome 8 open reading frame 47                                                                       | 670   | 181  | 3.709     | transcripts         |
| MmuSTS.2065.1.S1_s_at    | PYGL                   | phosphorylase,glycogen,liver                                                                             | 203   | 56   | 3.604     | transcripts         |
| MmugDNA.37200.1.S1_at    | SUSD3                  | sushi domain containing 3                                                                                | 744   | 208  | 3.580     | transcripts         |
| MmugDNA.27973.1.S1_at    | VAT1L                  | vesicle amine transport protein 1 homolog (T. californica)-like                                          | 194   | 56   | 3.503     | transcripts         |
| MmugDNA.31819.1.S1_at    | SLC26A2                | solute carrier family 26 (sulfate transporter),member 2                                                  | 2031  | 585  | 3.473     | transcripts         |
| Mmu.3044.13.S1_x_at      | LOC100423785           | ATP synthase subunit a-like                                                                              | 15638 | 4510 | 3.467     | transcripts         |
| MmugDNA.43522.1.S1_at    | GALNT7                 | UDP-N-acetyl-alpha-D-galactosamine:polypeptide N-acetylgalactosaminyltransferase 7 (GalNAc-T7)           | 93    | 27   | 3.438     | transcripts         |
| Mmu.3117.1.S1_at         | ---                    | ---                                                                                                      | 4112  | 1248 | 3.296     | ---                 |

|                         |              |                                                         |       |      |       |             |
|-------------------------|--------------|---------------------------------------------------------|-------|------|-------|-------------|
| MmugDNA.43592.1.S1_at   | ---          | ---                                                     | 206   | 65   | 3.187 | ---         |
| MmugDNA.32570.1.S1_at   | LYZ          | lysozyme (renal amyloidosis)                            | 1311  | 429  | 3.057 | transcripts |
| MmuSTS.345.1.S1_at      | SVIL         | supervillin                                             | 679   | 224  | 3.029 | transcripts |
| Mmu.6867.1.S1_s_at      | LOC100428825 | uncharacterized LOC100428825                            | 8041  | 3154 | 2.549 | transcripts |
| MmuAffx.23.14.S1_s_at   | ---          | ---                                                     | 19359 | 7630 | 2.537 | ---         |
| Mmu.15402.1.A1_at       | ---          | ---                                                     | 3394  | 1416 | 2.397 | ---         |
| Mmu.13865.1.S1_s_at     | ---          | ---                                                     | 4189  | 1754 | 2.388 | ---         |
| Mmu.15402.10.S1_s_at    | LOC100426925 | uncharacterized LOC100426925                            | 17356 | 7277 | 2.385 | transcripts |
| MmugDNA.32338.1.S1_at   | NAV1         | neuron navigator 1                                      | 194   | 83   | 2.333 | transcripts |
| MmugDNA.35652.1.S1_s_at | CCDC52       | coiled-coil domain containing 52                        | 345   | 151  | 2.294 | transcripts |
| MmugDNA.35036.1.S1_at   | ---          | ---                                                     | 2413  | 1061 | 2.275 | ---         |
| MmugDNA.16268.1.S1_s_at | GPX4         | glutathione peroxidase 4 (phospholipid hydroperoxidase) | 299   | 136  | 2.202 | transcripts |
| MmugDNA.24286.1.S1_at   | F2RL1        | coagulation factor II (thrombin) receptor-like 1        | 5374  | 2479 | 2.168 | transcripts |
| MmugDNA.33607.1.S1_at   | MRPL36       | mitochondrial ribosomal protein L36                     | 2387  | 1109 | 2.152 | transcripts |
| MmugDNA.10691.1.S1_at   | PTGER3       | prostaglandin E receptor 3 (subtype EP3)                | 1708  | 824  | 2.072 | transcripts |
| MmugDNA.39768.1.S1_at   | TMEM219      | transmembrane protein 219                               | 173   | 86   | 2.016 | transcripts |
| MmugDNA.13478.1.S1_at   | C11orf58     | chromosome 11 open reading frame 58                     | 591   | 310  | 1.907 | transcripts |
| MmugDNA.9782.1.S1_at    | ALAS1        | aminolevulinate,delta-,synthase 1                       | 1199  | 663  | 1.808 | transcripts |

### Genes showing increased expression in summer granulosa cells

| Probeset ID           | Gene Symbol | Gene Description                                                               | Ratio |      |           | Probes found in     |
|-----------------------|-------------|--------------------------------------------------------------------------------|-------|------|-----------|---------------------|
|                       |             |                                                                                | Ctrl  | Summ | Summ:Ctrl |                     |
| MmuSTS.3686.1.S1_at   | COL14A1     | collagen,type XIV,alpha 1                                                      | 39    | 627  | 16.268    | transcripts         |
| MmugDNA.42438.1.S1_at | ANKRD28     | ankyrin repeat domain 28                                                       | 35    | 502  | 14.490    | genic&downstr. reg. |
| MmugDNA.11070.1.S1_at | SYNE1       | spectrin repeat containing, nuclear envelope 1                                 | 12    | 127  | 10.560    | transcripts         |
| MmugDNA.6912.1.S1_at  | GPM6A       | glycoprotein M6A                                                               | 23    | 212  | 9.170     | transcripts         |
| MmugDNA.34306.1.S1_at | TGFBR3      | transforming growth factor, beta receptor III                                  | 17    | 131  | 7.770     | genic&downstr. reg. |
| MmugDNA.28937.1.S1_at | DNAJC1      | DnaJ (Hsp40) homolog, subfamily C, member 1                                    | 20    | 147  | 7.454     | genic&downstr. reg. |
| MmugDNA.11395.1.S1_at | FAM13A      | family with sequence similarity 13, member A                                   | 40    | 290  | 7.283     | genic&downstr. reg. |
| MmugDNA.13933.1.S1_at | HOPX        | HOP homeobox                                                                   | 65    | 395  | 6.073     | transcripts         |
| MmugDNA.16061.1.S1_at | RBMS3       | RNA binding motif, single stranded interacting protein 3                       | 13    | 77   | 5.779     | genic&downstr. reg. |
| MmugDNA.4885.1.S1_at  | GPM6A       | glycoprotein M6A                                                               | 40    | 219  | 5.544     | transcripts         |
| MmugDNA.26075.1.S1_at | DENND1B     | DENN/MADD domain containing 1B                                                 | 15    | 83   | 5.464     | genic&downstr. reg. |
| MmugDNA.8127.1.S1_at  | TFG         | TRK-fused gene                                                                 | 60    | 326  | 5.394     | genic&downstr. reg. |
| MmugDNA.12544.1.S1_at | ACSL3       | acyl-CoA synthetase long-chain family member 3                                 | 36    | 187  | 5.186     | transcripts         |
| MmugDNA.16839.1.S1_at | SLC20A1     | solute carrier family 20 (phosphate transporter), member 1                     | 135   | 696  | 5.140     | genic&downstr. reg. |
| MmugDNA.6175.1.S1_at  | TFPI        | tissue factor pathway inhibitor (lipoprotein-associated coagulation inhibitor) | 42    | 215  | 5.112     | genic&downstr. reg. |

|                         |              |                                                                                                |      |      |       |                     |
|-------------------------|--------------|------------------------------------------------------------------------------------------------|------|------|-------|---------------------|
| MmugDNA.5795.1.S1_at    | PTPRM        | protein tyrosine phosphatase, receptor type, M                                                 | 18   | 88   | 5.042 | genic&downstr. reg. |
| MmugDNA.28171.1.S1_at   | NEAT1        | nuclear paraspeckle assembly transcript 1 (non-protein coding)                                 | 190  | 887  | 4.674 | transcripts         |
| MmugDNA.38123.1.S1_at   | DENND1B      | DENN/MADD domain containing 1B                                                                 | 47   | 214  | 4.581 | genic&downstr. reg. |
| MmugDNA.6058.1.S1_at    | RORA         | RAR-related orphan receptor A                                                                  | 281  | 1284 | 4.575 | genic&downstr. reg. |
| MmugDNA.33749.1.S1_s_at | PGAP1        | post-GPI attachment to proteins 1                                                              | 555  | 2527 | 4.554 | genic&downstr. reg. |
| MmuSTS.2906.1.S1_at     | VWF          | von Willebrand factor                                                                          | 226  | 971  | 4.290 | transcripts         |
| MmugDNA.20894.1.S1_at   | MLLT3        | myeloid/lymphoid or mixed-lineage leukemia (trithorax homolog, Drosophila); translocated to, 3 | 21   | 90   | 4.228 | genic&downstr. reg. |
| MmugDNA.27708.1.S1_at   | TJP1         | tight junction protein 1                                                                       | 69   | 278  | 3.998 | genic&downstr. reg. |
| MmugDNA.11249.1.S1_at   | KCTD12       | potassium channel tetramerization domain containing 12                                         | 30   | 118  | 3.862 | transcripts         |
| MmugDNA.10709.1.S1_at   | EZR          | ezrin                                                                                          | 27   | 103  | 3.788 | genic&downstr. reg. |
| MmugDNA.21689.1.S1_at   | GPM6A        | glycoprotein M6A                                                                               | 23   | 80   | 3.504 | transcripts         |
| MmugDNA.2048.1.S1_at    | REV3L        | REV3-like, polymerase (DNA directed), zeta, catalytic subunit                                  | 48   | 154  | 3.223 | genic&downstr. reg. |
| MmugDNA.6861.1.S1_at    | H2AFY        | H2A histone family, member Y                                                                   | 28   | 89   | 3.175 | genic&downstr. reg. |
| MmuSTS.1361.1.S1_at     | ANXA4        | annexin A4                                                                                     | 152  | 479  | 3.146 | transcripts         |
| MmugDNA.14309.1.S1_at   | ALCAM        | activated leukocyte cell adhesion molecule                                                     | 48   | 151  | 3.139 | transcripts         |
| MmugDNA.30630.1.S1_at   | ---          | ---                                                                                            | 67   | 209  | 3.111 | ---                 |
| MmugDNA.21716.1.S1_at   | ---          | ---                                                                                            | 195  | 599  | 3.069 | ---                 |
| MmugDNA.37278.1.S1_at   | EID3         | EP300 interacting inhibitor of differentiation 3                                               | 109  | 329  | 3.027 | transcripts         |
| MmugDNA.31091.1.S1_at   | MAP9         | microtubule-associated protein 9                                                               | 399  | 1197 | 3.004 | transcripts         |
| MmugDNA.2759.1.S1_at    | USP15        | ubiquitin specific peptidase 15                                                                | 42   | 123  | 2.938 | genic&downstr. reg. |
| MmugDNA.21432.1.S1_at   | LOC729852    | uncharacterized LOC729852                                                                      | 31   | 90   | 2.912 | genic&downstr. reg. |
| MmugDNA.21050.1.S1_at   | LOC100132013 | hypothetical LOC100132013                                                                      | 49   | 139  | 2.812 | transcripts         |
| MmugDNA.2278.1.S1_at    | A2BP1        | ataxin 2-binding protein 1                                                                     | 115  | 310  | 2.686 | transcripts         |
| MmugDNA.25683.1.S1_at   | ARID5B       | AT rich interactive domain 5B (MRF1-like)                                                      | 126  | 337  | 2.676 | genic&downstr. reg. |
| MmugDNA.3305.1.S1_at    | ZNF614       | zinc finger protein 614                                                                        | 102  | 267  | 2.626 | genic&downstr. reg. |
| MmuSTS.1355.1.S1_at     | ALDH9A1      | aldehyde dehydrogenase 9 family, member A1                                                     | 722  | 1850 | 2.561 | transcripts         |
| MmunewRS.949.1.S1_at    | MT3          | metallothionein 3                                                                              | 204  | 515  | 2.530 | transcripts         |
| MmuSTS.3097.1.S1_at     | MID1         | midline 1 (Opitz/BBB syndrome)                                                                 | 62   | 157  | 2.524 | transcripts         |
| MmugDNA.7587.1.S1_at    | MDH1         | malate dehydrogenase 1, NAD (soluble)                                                          | 59   | 147  | 2.487 | genic&downstr. reg. |
| MmugDNA.36345.1.S1_at   | AUTS2        | autism susceptibility candidate 2                                                              | 337  | 823  | 2.444 | transcripts         |
| MmugDNA.14310.1.S1_at   | ALCAM        | activated leukocyte cell adhesion molecule                                                     | 1179 | 2839 | 2.409 | transcripts         |
| MmugDNA.43422.1.S1_s_at | CRIPT        | cysteine-rich PDZ-binding protein                                                              | 191  | 458  | 2.396 | transcripts         |
| MmugDNA.29455.1.S1_at   | INPP4A       | inositol polyphosphate-4-phosphatase, type I, 107kDa                                           | 537  | 1274 | 2.374 | transcripts         |
| MmuSTS.138.1.S1_at      | PRICKLE1     | prickle homolog 1 (Drosophila)                                                                 | 209  | 492  | 2.353 | transcripts         |

|                         |          |                                                                                                                                                |      |      |       |                     |
|-------------------------|----------|------------------------------------------------------------------------------------------------------------------------------------------------|------|------|-------|---------------------|
| MmugDNA.38804.1.S1_at   | INPP4A   | inositol polyphosphate-4-phosphatase,type I,107kDa                                                                                             | 174  | 409  | 2.350 | transcripts         |
| MmugDNA.43475.1.S1_at   | INPP4A   | inositol polyphosphate-4-phosphatase,type I,107kDa                                                                                             | 160  | 368  | 2.298 | transcripts         |
| MmugDNA.25911.1.S1_at   | ---      | ---                                                                                                                                            | 40   | 90   | 2.244 | ---                 |
| MmuSTS.1357.1.S1_s_at   | ANGPTL1  | angiopoietin-like 1                                                                                                                            | 75   | 164  | 2.187 | transcripts         |
| MmugDNA.28466.1.S1_at   | NPTN     | neuroplastin                                                                                                                                   | 159  | 348  | 2.182 | genic&downstr. reg. |
| MmugDNA.1421.1.S1_at    | PRICKLE2 | prickle homolog 2 (Drosophila)                                                                                                                 | 66   | 144  | 2.169 | transcripts         |
| MmugDNA.7673.1.S1_at    | ---      | ---                                                                                                                                            | 125  | 270  | 2.155 | ---                 |
| MmugDNA.11251.1.S1_at   | KCTD12   | potassium channel tetramerisation domain containing 12                                                                                         | 1226 | 2618 | 2.136 | transcripts         |
| MmugDNA.36491.1.S1_s_at | AKR1C2   | aldo-keto reductase family 1,member C2 (dihydrodiol dehydrogenase 2; bile acid binding protein; 3-alpha hydroxysteroid dehydrogenase,type III) | 974  | 2012 | 2.066 | transcripts         |
| MmugDNA.34028.1.S1_at   | MARK1    | MAP/microtubule affinity-regulating kinase 1                                                                                                   | 84   | 157  | 1.868 | transcripts         |
| MmugDNA.37092.1.S1_at   | DR1      | down-regulator of transcription 1,TBP-binding (negative cofactor 2)                                                                            | 64   | 112  | 1.747 | transcripts         |
| MmugDNA.11944.1.S1_at   | TMEM87A  | transmembrane protein 87A                                                                                                                      | 406  | 694  | 1.709 | transcripts         |
| MmugDNA.35680.1.S1_at   | CORO6    | coronin 6                                                                                                                                      | 64   | 104  | 1.628 | genic&downstr. reg. |
| MmugDNA.22282.1.S1_at   | WDFY1    | WD repeat and FYVE domain containing 1                                                                                                         | 280  | 444  | 1.586 | transcripts         |
