# Supplementary material
Source: PubMed Central journal article supplement (PMC4385968)
Supplement: tableS2.pdf [file tableS2.pdf]

**Table S2. Genes showing significantly different expression in summer cumulus cells**

**Genes showing reduced expression in summer cumulus cells**

| Probeset ID              | Gene Symbol | Gene Description                                                | Ratio |      |           | Probes found in     |
|--------------------------|-------------|-----------------------------------------------------------------|-------|------|-----------|---------------------|
|                          |             |                                                                 | Ctrl  | Summ | Ctrl:Summ |                     |
| MmuMitochon.6.1.S1_s_at  | ATP8        | ATP synthase F0 subunit 8                                       | 2293  | 53   | 43.185    | transcripts         |
| MmuMitochon.10.1.S1_s_at | ND4L        | NADH dehydrogenase subunit 4L                                   | 2117  | 77   | 27.330    | transcripts         |
| MmuMitochon.3.1.S1_s_at  | ND2         | NADH dehydrogenase subunit 2                                    | 6547  | 402  | 16.300    | transcripts         |
| MmugDNA.8704.1.S1_at     | STC2        | stanniocalcin 2                                                 | 1153  | 100  | 11.547    | transcripts         |
| MmuSTS.4178.1.S1_at      | CTSL2       | cathepsin L2                                                    | 251   | 30   | 8.312     | transcripts         |
| Mmu.6025.1.S1_at         | ---         | ---                                                             | 184   | 25   | 7.480     | ---                 |
| Mmu.6867.1.A1_at         | ---         | ---                                                             | 2795  | 376  | 7.438     | ---                 |
| MmugDNA.19043.1.S1_at    | SHISA2      | shisa homolog 2 (Xenopus laevis)                                | 1643  | 226  | 7.283     | genic&downstr. reg. |
| MmugDNA.21615.1.S1_at    | STC2        | stanniocalcin 2                                                 | 444   | 65   | 6.886     | transcripts         |
| MmugDNA.42645.1.S1_at    | ---         | ---                                                             | 364   | 65   | 5.558     | ---                 |
| Mmu.3117.1.S1_at         | ---         | ---                                                             | 4096  | 848  | 4.827     | ---                 |
| MmugDNA.38441.1.S1_at    | GUCY1A3     | guanylate cyclase 1,soluble,alpha 3                             | 122   | 30   | 4.009     | transcripts         |
| MmugDNA.9861.1.S1_at     | ACTN2       | actinin,alpha 2                                                 | 186   | 50   | 3.715     | transcripts         |
| MmugDNA.3526.1.S1_at     | ---         | ---                                                             | 216   | 59   | 3.688     | ---                 |
| MmugDNA.32328.1.S1_at    | LHFP        | lipoma HMGIC fusion partner                                     | 567   | 162  | 3.502     | transcripts         |
| MmugDNA.27799.1.S1_at    | C8orf47     | chromosome 8 open reading frame 47                              | 462   | 137  | 3.374     | transcripts         |
| MmugDNA.35476.1.S1_at    | MCC         | mutated in colorectal cancers                                   | 159   | 49   | 3.252     | transcripts         |
| MmuSTS.1688.1.S1_at      | UGT1A9      | UDP glucuronosyltransferase 1 family,polypeptide A9             | 805   | 249  | 3.227     | transcripts         |
| Mmu.3064.4.S1_s_at       | ---         | ---                                                             | 18738 | 5834 | 3.212     | ---                 |
| MmugDNA.21104.1.S1_at    | LHCGR       | luteinizing hormone/choriogonadotropin receptor                 | 157   | 50   | 3.166     | transcripts         |
| MmugDNA.25149.1.S1_at    | ZNF879      | zinc finger protein 879                                         | 119   | 39   | 3.053     | transcripts         |
| MmugDNA.40336.1.S1_at    | COL5A1      | collagen, type V, alpha 1                                       | 271   | 89   | 3.033     | transcripts         |
| MmugDNA.28033.1.S1_at    | SIDT1       | SID1 transmembrane family,member 1                              | 230   | 77   | 2.982     | transcripts         |
| MmugDNA.7989.1.S1_at     | ANGPT2      | angiopoietin 2                                                  | 98    | 34   | 2.905     | transcripts         |
| MmugDNA.36098.1.S1_at    | ANKRD37     | ankyrin repeat domain 37                                        | 1053  | 364  | 2.892     | transcripts         |
| MmuSTS.2135.1.S1_at      | SAP30       | Sin3A-associated protein,30kDa                                  | 129   | 45   | 2.861     | transcripts         |
| MmuSTS.2065.1.S1_s_at    | PYGL        | phosphorylase,glycogen,liver                                    | 259   | 91   | 2.853     | transcripts         |
| MmugDNA.27973.1.S1_at    | VAT1L       | vesicle amine transport protein 1 homolog (T. californica)-like | 888   | 320  | 2.774     | transcripts         |
| MmugDNA.15364.1.S1_at    | OPN3        | opsin 3                                                         | 373   | 136  | 2.744     | transcripts         |
| MmuSTS.3605.1.S1_at      | DYNC111     | dynein,cytoplasmic 1,intermediate chain 1                       | 493   | 180  | 2.742     | transcripts         |
| MmugDNA.13626.1.S1_at    | PTGIS       | prostaglandin I2 (prostacyclin) synthase                        | 190   | 70   | 2.736     | transcripts         |
| MmugDNA.20560.1.S1_at    | TRIM9       | tripartite motif-containing 9                                   | 96    | 35   | 2.731     | transcripts         |
| MmugDNA.42278.1.S1_s_at  | SGMS2       | sphingomyelin synthase 2                                        | 424   | 156  | 2.724     | transcripts         |
| MmugDNA.19504.1.S1_at    | SORBS2      | sorbin and SH3 domain containing 2                              | 1326  | 487  | 2.719     | genic&downstr. reg. |

|                         |              |                                                                          |       |      |       |                     |
|-------------------------|--------------|--------------------------------------------------------------------------|-------|------|-------|---------------------|
| Mmu.3044.13.S1_x_at     | LOC100423785 | ATP synthase subunit a-like                                              | 14663 | 5407 | 2.712 | transcripts         |
| MmugDNA.19923.1.S1_at   | RFTN2        | raftlin family member 2                                                  | 143   | 53   | 2.707 | transcripts         |
| MmugDNA.40338.1.S1_s_at | COL5A1       | collagen,type V,alpha 1                                                  | 191   | 71   | 2.693 | transcripts         |
| MmuSTS.2065.1.S1_x_at   | PYGL         | phosphorylase,glycogen,liver                                             | 638   | 237  | 2.686 | transcripts         |
| MmugDNA.33613.1.S1_at   | ---          | ---                                                                      | 366   | 140  | 2.610 | ---                 |
| MmuSTS.3872.1.S1_at     | SLC2A1       | solute carrier family 2 (facilitated glucose transporter),member 1       | 603   | 232  | 2.595 | transcripts         |
| MmuSTS.3980.1.S1_at     | SH3BGR       | SH3 domain binding glutamic acid-rich protein                            | 528   | 204  | 2.591 | transcripts         |
| MmuSTS.2065.1.S1_at     | PYGL         | phosphorylase,glycogen,liver                                             | 602   | 233  | 2.587 | transcripts         |
| MmugDNA.33494.1.S1_at   | ELAVL2       | ELAV (embryonic lethal,abnormal vision,Drosophila)-like 2 (Hu antigen B) | 814   | 316  | 2.581 | transcripts         |
| MmugDNA.9064.1.S1_at    | ---          | ---                                                                      | 255   | 99   | 2.572 | ---                 |
| MmugDNA.16704.1.S1_at   | COX4I1       | cytochrome c oxidase subunit IV isoform 1                                | 347   | 137  | 2.528 | transcripts         |
| MmuSTS.4136.1.S1_at     | ENO2         | enolase 2 (gamma,neuronal)                                               | 389   | 155  | 2.508 | transcripts         |
| MmuSTS.4189.1.S1_s_at   | OLFM4        | olfactomedin 4                                                           | 2554  | 1021 | 2.502 | transcripts         |
| MmugDNA.33613.1.S1_x_at | ---          | ---                                                                      | 262   | 106  | 2.458 | ---                 |
| MmuSTS.3600.1.S1_at     | DAPK1        | death-associated protein kinase 1                                        | 265   | 108  | 2.458 | transcripts         |
| MmugDNA.28658.1.S1_at   | PELP1        | proline, glutamate and leucine rich protein 1                            | 178   | 72   | 2.454 | genic&downstr. reg. |
| Mmu.6048.2.S1_at        | ---          | ---                                                                      | 97    | 40   | 2.419 | ---                 |
| MmugDNA.357.1.S1_at     | DCLK1        | doublecortin-like kinase 1                                               | 156   | 65   | 2.412 | transcripts         |
| MmugDNA.39180.1.S1_at   | JAKMIP2      | janus kinase and microtubule interacting protein 2                       | 254   | 105  | 2.409 | transcripts         |
| MmuAffx.23.14.S1_s_at   | ---          | ---                                                                      | 18850 | 7898 | 2.387 | ---                 |
| MmugDNA.31648.1.S1_at   | PID1         | phosphotyrosine interaction domain containing 1                          | 176   | 74   | 2.369 | transcripts         |
| MmuSTS.921.1.S1_at      | MMP1         | matrix metalloproteinase 1 (interstitial collagenase)                    | 120   | 51   | 2.360 | transcripts         |
| MmugDNA.27981.1.S1_at   | LRRC49       | leucine rich repeat containing 49                                        | 187   | 80   | 2.349 | transcripts         |
| MmugDNA.29470.1.S1_at   | ---          | ---                                                                      | 356   | 152  | 2.339 | ---                 |
| MmuSTS.2655.1.S1_at     | ABCA8        | ATP-binding cassette,sub-family A (ABC1),member 8                        | 141   | 61   | 2.326 | transcripts         |
| MmugDNA.20507.1.S1_at   | ---          | ---                                                                      | 371   | 160  | 2.326 | ---                 |
| MmugDNA.579.1.S1_at     | RHPN2        | rhopilin,Rho GTPase binding protein 2                                    | 236   | 102  | 2.303 | transcripts         |
| MmugDNA.23054.1.S1_at   | SLC22A23     | solute carrier family 22,member 23                                       | 497   | 216  | 2.302 | transcripts         |
| MmugDNA.8421.1.S1_at    | PDZRN3       | PDZ domain containing ring finger 3                                      | 431   | 188  | 2.294 | transcripts         |
| MmuSTS.2101.1.S1_at     | RIN2         | Ras and Rab interactor 2                                                 | 478   | 210  | 2.279 | transcripts         |
| MmuSTS.4406.1.S1_at     | COL5A1       | collagen,type V,alpha 1                                                  | 359   | 158  | 2.268 | transcripts         |
| MmugDNA.39722.1.S1_at   | FRMD5        | FERM domain containing 5                                                 | 99    | 44   | 2.249 | genic&downstr. reg. |
| Mmu.15402.1.A1_at       | ---          | ---                                                                      | 3095  | 1396 | 2.217 | ---                 |
| MmunewRS.356.1.S1_s_at  | CRIP1        | cysteine-rich protein 1 (intestinal)                                     | 459   | 209  | 2.198 | transcripts         |
| MmugDNA.32938.1.S1_at   | CBWD3        | COBW domain containing 3                                                 | 113   | 51   | 2.197 | transcripts         |
| MmuSTS.4660.1.S1_at     | TNFAIP6      | tumor necrosis factor,alpha-induced protein 6                            | 1318  | 611  | 2.156 | transcripts         |

|                       |                                   |                                                                        |      |     |       |                     |
|-----------------------|-----------------------------------|------------------------------------------------------------------------|------|-----|-------|---------------------|
| MmuSTS.1837.1.S1_at   | UST                               | uronyl-2-sulfotransferase                                              | 328  | 153 | 2.143 | transcripts         |
| MmugDNA.17750.1.S1_at | ATP2B1                            | ATPase,Ca transporting,plasma membrane 1                               | 466  | 219 | 2.127 | transcripts         |
| MmugDNA.36416.1.S1_at | KLHL23 ///<br>PHOSPHO2-<br>KLHL23 | PHOSPHO2-KLHL23 readthrough /// kelch-like family member 23            | 336  | 159 | 2.110 | genic&downstr. reg. |
| MmugDNA.18785.1.S1_at | BNIP3                             | BCL2/adenovirus E1B 19kDa interacting protein 3                        | 962  | 457 | 2.104 | transcripts         |
| MmugDNA.35629.1.S1_at | CYP19A1                           | cytochrome P450, family 19, subfamily A, polypeptide 1                 | 1593 | 757 | 2.103 | transcripts         |
| MmugDNA.34243.1.S1_at | KCNAB1                            | potassium voltage-gated channel,shaker-related subfamily,beta member 1 | 299  | 143 | 2.093 | transcripts         |
| MmugDNA.5413.1.S1_at  | ---                               | ---                                                                    | 112  | 54  | 2.086 | ---                 |
| MmuSTS.3163.1.S1_at   | RGS7                              | regulator of G-protein signaling 7                                     | 215  | 103 | 2.081 | transcripts         |
| MmugDNA.31819.1.S1_at | SLC26A2                           | solute carrier family 26 (sulfate transporter),member 2                | 681  | 331 | 2.055 | transcripts         |
| MmugDNA.31856.1.S1_at | RIF1                              | RAP1 interacting factor homolog (yeast)                                | 285  | 138 | 2.055 | genic&downstr. reg. |
| MmuSTS.813.1.S1_at    | DDIT4                             | DNA-damage-inducible transcript 4                                      | 386  | 189 | 2.036 | transcripts         |
| Mmu.4442.1.S1_s_at    | ---                               | ---                                                                    | 991  | 487 | 2.036 | ---                 |
| MmugDNA.7835.1.S1_at  | PABPC4L                           | poly(A) binding protein,cytoplasmic 4-like                             | 120  | 59  | 2.028 | transcripts         |
| MmugDNA.28101.1.S1_at | ST3GAL5                           | ST3 beta-galactoside alpha-2,3-sialyltransferase 5                     | 441  | 218 | 2.022 | transcripts         |
| MmugDNA.32170.1.S1_at | C20orf160                         | chromosome 20 open reading frame 160                                   | 395  | 195 | 2.021 | transcripts         |
| MmugDNA.34151.1.S1_at | DYNLT3                            | dynein,light chain,Tctex-type 3                                        | 636  | 318 | 1.999 | transcripts         |
| MmugDNA.327.1.S1_at   | PFKFB4                            | 6-phosphofructo-2-kinase/fructose-2,6-biphosphatase 4                  | 882  | 443 | 1.989 | genic&downstr. reg. |
| MmugDNA.27864.1.S1_at | COL12A1                           | collagen,type XII,alpha 1                                              | 96   | 48  | 1.988 | transcripts         |
| MmugDNA.34279.1.S1_at | RYR2                              | ryanodine receptor 2 (cardiac)                                         | 188  | 94  | 1.987 | transcripts         |
| MmugDNA.3351.1.S1_at  | NSG1                              | neuron specific gene family member 1                                   | 537  | 271 | 1.982 | transcripts         |
| MmugDNA.37334.1.S1_at | ---                               | ---                                                                    | 144  | 73  | 1.970 | ---                 |
| MmugDNA.39542.1.S1_at | GUCY1B3                           | guanylate cyclase 1,soluble,beta 3                                     | 94   | 48  | 1.966 | transcripts         |
| MmugDNA.10449.1.S1_at | ---                               | ---                                                                    | 636  | 325 | 1.956 | ---                 |
| MmugDNA.21052.1.S1_at | ---                               | ---                                                                    | 320  | 165 | 1.940 | ---                 |
| MmugDNA.40984.1.S1_at | STON1                             | stonin 1                                                               | 100  | 52  | 1.938 | transcripts         |
| MmuSTS.809.1.S1_at    | ASAP2                             | ArfGAP with SH3 domain,ankyrin repeat and PH domain 2                  | 222  | 115 | 1.929 | transcripts         |
| MmugDNA.22711.1.S1_at | RARS2                             | arginyl-tRNA synthetase 2,mitochondrial                                | 481  | 250 | 1.925 | transcripts         |
| MmuSTS.3429.1.S1_at   | COL12A1                           | collagen,type XII,alpha 1                                              | 536  | 279 | 1.919 | transcripts         |
| MmuSTS.1273.1.S1_at   | DCLK1                             | doublecortin-like kinase 1                                             | 1557 | 818 | 1.904 | transcripts         |
| MmuSTS.1232.1.S1_at   | CPNE4                             | copine IV                                                              | 111  | 58  | 1.897 | transcripts         |
| MmugDNA.20015.1.S1_at | GGPS1                             | geranylgeranyl diphosphate synthase 1                                  | 154  | 81  | 1.895 | transcripts         |
| MmugDNA.32827.1.S1_at | TMEM90B                           | transmembrane protein 90B                                              | 157  | 83  | 1.882 | transcripts         |

|                       |                    |                                                                             |      |      |       |                     |
|-----------------------|--------------------|-----------------------------------------------------------------------------|------|------|-------|---------------------|
| MmugDNA.2140.1.S1_at  | INSIG2             | insulin induced gene 2                                                      | 199  | 106  | 1.879 | transcripts         |
| MmugDNA.8112.1.S1_at  | ---                | ---                                                                         | 637  | 340  | 1.874 | ---                 |
| MmuSTS.4685.1.S1_at   | TYMS               | thymidylate synthetase                                                      | 273  | 146  | 1.872 | transcripts         |
| MmugDNA.13752.1.S1_at | SPATA7             | spermatogenesis associated 7                                                | 201  | 108  | 1.872 | transcripts         |
| MmugDNA.15777.1.S1_at | TRMT61B            | tRNA methyltransferase 61 homolog B (S. cerevisiae)                         | 418  | 224  | 1.868 | transcripts         |
| MmuSTS.3178.1.S1_at   | RNF144A            | ring finger protein 144A                                                    | 604  | 324  | 1.865 | transcripts         |
| MmugDNA.39440.1.S1_at | CDR2               | cerebellar degeneration-related protein 2,62kDa                             | 185  | 99   | 1.864 | transcripts         |
| MmuSTS.4341.1.S1_at   | SLC12A2            | solute carrier family 12 (sodium/potassium/chloride transporters), member 2 | 108  | 58   | 1.864 | genic&downstr. reg. |
| MmugDNA.21828.1.S1_at | BDH2               | 3-hydroxybutyrate dehydrogenase,type 2                                      | 134  | 72   | 1.861 | transcripts         |
| MmugDNA.10370.1.S1_at | ARV1               | ARV1 homolog (S. cerevisiae)                                                | 245  | 132  | 1.853 | transcripts         |
| MmugDNA.877.1.S1_at   | SORBS2             | sorbin and SH3 domain containing 2                                          | 765  | 413  | 1.851 | genic&downstr. reg. |
| Mmu.5288.1.S1_at      | LOC100423814       | cytochrome c oxidase subunit 7C, mitochondrial-like                         | 4156 | 2247 | 1.850 | transcripts         |
| MmugDNA.42808.1.S1_at | ZEB1               | zinc finger E-box binding homeobox 1                                        | 310  | 168  | 1.849 | transcripts         |
| MmugDNA.36175.1.S1_at | SLC26A2            | solute carrier family 26 (sulfate transporter),member 2                     | 1026 | 556  | 1.845 | transcripts         |
| MmugDNA.7590.1.S1_at  | SH3D19             | SH3 domain containing 19                                                    | 173  | 94   | 1.845 | transcripts         |
| MmugDNA.12017.1.S1_at | FANK1              | fibronectin type III and ankyrin repeat domains 1                           | 137  | 74   | 1.839 | transcripts         |
| MmugDNA.1672.1.S1_at  | TNFAIP6            | tumor necrosis factor,alpha-induced protein 6                               | 392  | 214  | 1.837 | transcripts         |
| MmugDNA.13968.1.S1_at | GCOM1 ///<br>MYZAP | GRINL1A complex locus 1 /// myocardial zonula adherens protein              | 971  | 529  | 1.837 | transcripts         |
| MmugDNA.21575.1.S1_at | IRX3               | iroquois homeobox 3                                                         | 474  | 259  | 1.831 | transcripts         |
| MmugDNA.25037.1.S1_at | ARL5A              | ADP-ribosylation factor-like 5A                                             | 432  | 236  | 1.831 | genic&downstr. reg. |
| MmugDNA.7522.1.S1_at  | ---                | ---                                                                         | 160  | 88   | 1.820 | ---                 |
| MmugDNA.13217.1.S1_at | IKBIP              | IKBKB interacting protein                                                   | 488  | 269  | 1.819 | transcripts         |
| MmugDNA.12912.1.S1_at | ---                | ---                                                                         | 278  | 153  | 1.818 | ---                 |
| MmugDNA.9983.1.S1_at  | SEPT11             | septin 11                                                                   | 231  | 127  | 1.816 | genic&downstr. reg. |
| MmugDNA.5448.1.S1_at  | ---                | ---                                                                         | 111  | 61   | 1.810 | ---                 |
| MmugDNA.9106.1.S1_at  | LARP6              | La ribonucleoprotein domain family, member 6                                | 81   | 45   | 1.803 | transcripts         |
| MmugDNA.15046.1.S1_at | HMCN1              | hemicentin 1                                                                | 290  | 161  | 1.797 | transcripts         |
| MmugDNA.13156.1.S1_at | CAV1               | caveolin 1,caveolae protein,22kDa                                           | 790  | 440  | 1.797 | transcripts         |
| MmugDNA.8435.1.S1_at  | PROSC              | proline synthetase co-transcribed homolog (bacterial)                       | 147  | 82   | 1.783 | transcripts         |
| MmugDNA.8778.1.S1_at  | ASAP1              | ArfGAP with SH3 domain,ankyrin repeat and PH domain 1                       | 312  | 176  | 1.770 | transcripts         |
| MmugDNA.15092.1.S1_at | CHST7              | carbohydrate (N-acetylglucosamine 6-O) sulfotransferase 7                   | 226  | 128  | 1.767 | transcripts         |
| MmuSTS.4562.1.S1_at   | TCEA3              | transcription elongation factor A (SII),3                                   | 669  | 380  | 1.760 | transcripts         |

|                         |                     |                                                                                                   |      |      |       |                     |
|-------------------------|---------------------|---------------------------------------------------------------------------------------------------|------|------|-------|---------------------|
| MmugDNA.15417.1.S1_at   | CDK8                | cyclin-dependent kinase 8                                                                         | 181  | 103  | 1.758 | genic&downstr. reg. |
| MmugDNA.37811.1.S1_at   | ETAA1               | Ewing tumor-associated antigen 1                                                                  | 218  | 124  | 1.754 | transcripts         |
| MmugDNA.3425.1.S1_at    | ---                 | ---                                                                                               | 175  | 100  | 1.742 | ---                 |
| MmuSTS.2903.1.S1_at     | VEGFC               | vascular endothelial growth factor C                                                              | 94   | 54   | 1.735 | transcripts         |
| MmugDNA.8340.1.S1_at    | C13orf36            | chromosome 13 open reading frame 36                                                               | 1741 | 1004 | 1.735 | transcripts         |
| MmugDNA.40534.1.S1_s_at | SKP2                | S-phase kinase-associated protein 2, E3 ubiquitin protein ligase                                  | 106  | 61   | 1.734 | genic&downstr. reg. |
| MmugDNA.12399.1.S1_at   | TMX1                | thioredoxin-related transmembrane protein 1                                                       | 2097 | 1213 | 1.728 | transcripts         |
| MmugDNA.5051.1.S1_s_at  | CDCA7L              | cell division cycle associated 7-like                                                             | 372  | 215  | 1.726 | genic&downstr. reg. |
| MmugDNA.21010.1.S1_at   | ZSCAN29             | zinc finger and SCAN domain containing 29                                                         | 236  | 137  | 1.723 | transcripts         |
| MmugDNA.9349.1.S1_at    | CKLF /// CKLF-CMTM1 | CKLF-CMTM1 readthrough /// chemokine-like factor                                                  | 536  | 311  | 1.722 | genic&downstr. reg. |
| MmugDNA.18610.1.S1_at   | MIR210 /// MIR210HG | MIR210 host gene (non-protein coding) /// microRNA 210                                            | 364  | 212  | 1.719 | genic&downstr. reg. |
| MmuSTS.1414.1.S1_at     | CAV2                | caveolin 2                                                                                        | 1143 | 665  | 1.719 | transcripts         |
| MmugDNA.37206.1.S1_at   | SMAD7               | SMAD family member 7                                                                              | 139  | 81   | 1.718 | transcripts         |
| MmugDNA.3502.1.S1_at    | GLCE                | glucuronic acid epimerase                                                                         | 738  | 430  | 1.715 | transcripts         |
| MmugDNA.13821.1.S1_s_at | CES1                | carboxylesterase 1 (monocyte/macrophage serine esterase 1)                                        | 1142 | 668  | 1.708 | transcripts         |
| MmugDNA.18194.1.S1_at   | MAP2K6              | mitogen-activated protein kinase kinase 6                                                         | 109  | 64   | 1.707 | transcripts         |
| MmugDNA.4477.1.S1_at    | CES1                | carboxylesterase 1 (monocyte/macrophage serine esterase 1)                                        | 359  | 211  | 1.700 | transcripts         |
| MmugDNA.30425.1.S1_at   | ALG9                | asparagine-linked glycosylation 9, alpha-1,2-mannosyltransferase homolog ( <i>S. cerevisiae</i> ) | 443  | 260  | 1.699 | transcripts         |
| MmugDNA.33877.1.S1_at   | D4S234E             | DNA segment on chromosome 4 (unique) 234 expressed sequence                                       | 772  | 455  | 1.697 | transcripts         |
| MmugDNA.33296.1.S1_at   | JUB                 | jub, ajuba homolog ( <i>Xenopus laevis</i> )                                                      | 1134 | 669  | 1.694 | transcripts         |
| MmugDNA.8964.1.S1_s_at  | ZNF627              | zinc finger protein 627                                                                           | 355  | 209  | 1.694 | transcripts         |
| MmugDNA.30648.1.S1_at   | IFT81               | intraflagellar transport 81 homolog ( <i>Chlamydomonas</i> )                                      | 137  | 81   | 1.692 | transcripts         |
| MmugDNA.17479.1.S1_at   | ---                 | ---                                                                                               | 1142 | 677  | 1.687 | ---                 |
| MmugDNA.18859.1.S1_at   | LOC707289           | endothelial zinc finger protein induced by tumor necrosis factor alpha-like                       | 123  | 73   | 1.686 | genic&downstr. reg. |
| MmugDNA.43133.1.S1_at   | NME5                | NME/NM23 family member 5                                                                          | 165  | 98   | 1.683 | transcripts         |
| MmugDNA.26960.1.S1_at   | DCAF13              | DDB1 and CUL4 associated factor 13                                                                | 398  | 237  | 1.682 | transcripts         |
| MmugDNA.31556.1.S1_at   | TES                 | testis derived transcript (3 LIM domains)                                                         | 1502 | 894  | 1.681 | transcripts         |
| MmugDNA.30627.1.S1_s_at | AJUBA               | ajuba LIM protein                                                                                 | 727  | 433  | 1.680 | transcripts         |
| MmugDNA.18285.1.S1_at   | PON2                | paraoxonase 2                                                                                     | 115  | 68   | 1.679 | genic&downstr. reg. |
| MmugDNA.28771.1.S1_at   | ---                 | ---                                                                                               | 178  | 106  | 1.679 | ---                 |
| MmugDNA.21209.1.S1_at   | LRRC27              | leucine rich repeat containing 27                                                                 | 165  | 98   | 1.678 | transcripts         |
| MmugDNA.23750.1.S1_at   | PARP11              | poly (ADP-ribose) polymerase family, member 11                                                    | 873  | 524  | 1.669 | transcripts         |

|                         |          |                                                                             |      |      |       |                     |
|-------------------------|----------|-----------------------------------------------------------------------------|------|------|-------|---------------------|
| MmugDNA.22887.1.S1_s_at | MRPL30   | mitochondrial ribosomal protein L30                                         | 148  | 89   | 1.666 | transcripts         |
| MmugDNA.27852.1.S1_at   | RIMKLB   | ribosomal modification protein rimK-like family member B                    | 408  | 245  | 1.665 | transcripts         |
| MmugDNA.34216.1.S1_at   | ZBTB8A   | zinc finger and BTB domain containing 8A                                    | 91   | 55   | 1.665 | transcripts         |
| MmugDNA.617.1.S1_at     | PLEKHH1  | pleckstrin homology domain containing,family H (with MyTH4 domain) member 1 | 139  | 84   | 1.664 | transcripts         |
| MmugDNA.14289.1.S1_at   | KCTD1    | potassium channel tetramerisation domain containing 1                       | 1054 | 635  | 1.661 | transcripts         |
| MmugDNA.3538.1.S1_at    | RIMS2    | regulating synaptic membrane exocytosis 2                                   | 173  | 104  | 1.657 | transcripts         |
| MmuSTS.1223.1.S1_at     | POSTN    | periostin,osteoblast specific factor                                        | 1775 | 1073 | 1.654 | transcripts         |
| MmugDNA.2116.1.S1_at    | HMGB1    | high-mobility group box 1                                                   | 187  | 113  | 1.652 | transcripts         |
| MmugDNA.29009.1.S1_at   | ---      | ---                                                                         | 310  | 188  | 1.651 | ---                 |
| MmunewRS.149.1.S1_at    | C9orf91  | chromosome 9 open reading frame 91                                          | 323  | 196  | 1.648 | transcripts         |
| MmugDNA.35114.1.S1_at   | ZNF350   | zinc finger protein 350                                                     | 385  | 235  | 1.637 | transcripts         |
| MmugDNA.28179.1.S1_at   | PDE7B    | phosphodiesterase 7B                                                        | 192  | 118  | 1.623 | transcripts         |
| MmuSTS.3856.1.S1_at     | SLC26A2  | solute carrier family 26 (sulfate transporter),member 2                     | 87   | 54   | 1.601 | transcripts         |
| MmugDNA.33041.1.S1_at   | ---      | ---                                                                         | 98   | 61   | 1.598 | ---                 |
| MmuSTS.555.1.S1_at      | BHMT     | betaine--homocysteine S-methyltransferase                                   | 155  | 98   | 1.584 | transcripts         |
| MmuSTS.2151.1.S1_at     | BCAT1    | branched chain aminotransferase 1,cytosolic                                 | 1719 | 1086 | 1.583 | transcripts         |
| MmugDNA.42233.1.S1_s_at | STYXL1   | serine/threonine/tyrosine interacting-like 1                                | 495  | 314  | 1.576 | transcripts         |
| MmugDNA.26751.1.S1_at   | ZNF12    | zinc finger protein 12                                                      | 345  | 219  | 1.574 | transcripts         |
| MmugDNA.29113.1.S1_at   | LMBR1    | limb reg. 1 homolog (mouse)                                                 | 430  | 273  | 1.573 | transcripts         |
| MmugDNA.28933.1.S1_at   | SEPT11   | septin 11                                                                   | 1193 | 759  | 1.572 | transcripts         |
| Mmu.4512.2.S1_at        | MRPS10   | mitochondrial ribosomal protein S10                                         | 193  | 123  | 1.568 | transcripts         |
| MmugDNA.4207.1.S1_at    | KIAA1430 | KIAA1430                                                                    | 518  | 331  | 1.566 | transcripts         |
| MmugDNA.28405.1.S1_at   | ---      | ---                                                                         | 334  | 215  | 1.555 | ---                 |
| MmuSTS.1578.1.S1_at     | NIN      | ninein (GSK3B interacting protein)                                          | 132  | 86   | 1.533 | transcripts         |
| MmugDNA.30295.1.S1_at   | MRPL44   | mitochondrial ribosomal protein L44                                         | 234  | 153  | 1.524 | transcripts         |
| MmugDNA.42921.1.S1_at   | H3F3B    | H3 histone,family 3B (H3.3B)                                                | 1106 | 726  | 1.523 | transcripts         |
| MmugDNA.43063.1.S1_s_at | C9orf30  | chromosome 9 open reading frame 30                                          | 135  | 90   | 1.497 | transcripts         |
| MmugDNA.33751.1.S1_at   | RASD1    | RAS,dexamethasone-induced 1                                                 | 1436 | 960  | 1.497 | transcripts         |
| MmuSTS.3342.1.S1_at     | SMYD3    | SET and MYND domain containing 3                                            | 231  | 155  | 1.484 | transcripts         |
| MmugDNA.15847.1.S1_at   | RABEP1   | rabaptin, RAB GTPase binding effector protein 1                             | 421  | 287  | 1.465 | genic&downstr. reg. |
| MmugDNA.11063.1.S1_at   | ELK3     | ELK3, ETS-domain protein (SRF accessory protein 2)                          | 422  | 289  | 1.459 | genic&downstr. reg. |
| MmugDNA.33378.1.S1_s_at | EGLN1    | egl nine homolog 1 (C. elegans)                                             | 520  | 366  | 1.423 | transcripts         |
| MmugDNA.31015.1.S1_at   | CCBL1    | cysteine conjugate-beta lyase,cytoplasmic                                   | 278  | 196  | 1.421 | transcripts         |
| MmugDNA.16094.1.S1_at   | CANX     | calnexin                                                                    | 1060 | 752  | 1.409 | transcripts         |

## Genes showing increased expression in summer cumulus cells

| Probeset ID             | Gene Symbol | Gene Description                                               | Ratio |      |           | Probes found in     |
|-------------------------|-------------|----------------------------------------------------------------|-------|------|-----------|---------------------|
|                         |             |                                                                | Ctrl  | Summ | Summ:Ctrl |                     |
| MmuSTS.3686.1.S1_at     | COL14A1     | collagen,type XIV,alpha 1                                      | 31    | 384  | 12.200    | transcripts         |
| MmugDNA.11070.1.S1_at   | SYNE1       | spectrin repeat containing, nuclear envelope 1                 | 34    | 255  | 7.438     | transcripts         |
| Mmu.10186.1.S1_at       | DEFB122     | defensin, beta 122 (pseudogene)                                | 31    | 230  | 7.367     | transcripts         |
| Mmu.5303.1.S1_at        | ---         | ---                                                            | 57    | 418  | 7.277     | ---                 |
| MmugDNA.34451.1.S1_at   | NOV         | nephroblastoma overexpressed                                   | 23    | 122  | 5.310     | transcripts         |
| MmugDNA.42438.1.S1_at   | ANKRD28     | ankyrin repeat domain 28                                       | 35    | 179  | 5.079     | genic&downstr. reg. |
| MmuSTS.2906.1.S1_at     | VWF         | von Willebrand factor                                          | 154   | 761  | 4.935     | transcripts         |
| MmugDNA.17507.1.S1_at   | ANK3        | ankyrin 3, node of Ranvier (ankyrin G)                         | 35    | 162  | 4.653     | genic&downstr. reg. |
| MmugDNA.393.1.S1_at     | ---         | ---                                                            | 161   | 689  | 4.280     | ---                 |
| MmuSTS.1361.1.S1_at     | ANXA4       | annexin A4                                                     | 178   | 720  | 4.057     | transcripts         |
| MmugDNA.28171.1.S1_at   | NEAT1       | nuclear paraspeckle assembly transcript 1 (non-protein coding) | 231   | 922  | 3.987     | transcripts         |
| MmugDNA.11872.1.S1_at   | MAP4K4      | mitogen-activated protein kinase kinase kinase kinase 4        | 60    | 237  | 3.982     | genic&downstr. reg. |
| MmugDNA.6058.1.S1_at    | RORA        | RAR-related orphan receptor A                                  | 181   | 702  | 3.875     | genic&downstr. reg. |
| MmugDNA.11251.1.S1_at   | KCTD12      | potassium channel tetramerisation domain containing 12         | 545   | 2013 | 3.693     | transcripts         |
| MmugDNA.26082.1.S1_at   | CPEB4       | cytoplasmic polyadenylation element binding protein 4          | 59    | 217  | 3.663     | transcripts         |
| MmugDNA.14309.1.S1_at   | ALCAM       | activated leukocyte cell adhesion molecule                     | 38    | 139  | 3.622     | transcripts         |
| MmuSTS.1357.1.S1_s_at   | ANGPTL1     | angiopoietin-like 1                                            | 24    | 85   | 3.597     | transcripts         |
| MmugDNA.17754.1.S1_at   | ---         | ---                                                            | 105   | 369  | 3.526     | ---                 |
| MmugDNA.18778.1.S1_s_at | HPGD        | hydroxyprostaglandin dehydrogenase 15-(NAD)                    | 91    | 295  | 3.243     | transcripts         |
| MmuSTS.3135.1.S1_at     | RGS4        | regulator of G-protein signaling 4                             | 131   | 423  | 3.237     | transcripts         |
| MmuSTS.2617.1.S1_at     | ---         | ---                                                            | 288   | 879  | 3.058     | ---                 |
| MmuSTS.2426.1.S1_at     | GPR116      | G protein-coupled receptor 116                                 | 40    | 123  | 3.036     | transcripts         |
| MmugDNA.11395.1.S1_at   | FAM13A      | family with sequence similarity 13, member A                   | 52    | 154  | 2.978     | genic&downstr. reg. |
| MmugDNA.12998.1.S1_at   | ---         | ---                                                            | 185   | 549  | 2.964     | ---                 |
| MmugDNA.28937.1.S1_at   | DNAJC1      | DnaJ (Hsp40) homolog, subfamily C, member 1                    | 28    | 83   | 2.950     | genic&downstr. reg. |
| MmugDNA.28587.1.S1_at   | ---         | ---                                                            | 642   | 1875 | 2.921     | ---                 |
| MmugDNA.6268.1.S1_at    | DST         | dystonin                                                       | 28    | 82   | 2.893     | genic&downstr. reg. |
| MmugDNA.16839.1.S1_at   | SLC20A1     | solute carrier family 20 (phosphate transporter), member 1     | 216   | 615  | 2.848     | genic&downstr. reg. |
| MmugDNA.2118.1.S1_at    | MAML2       | mastermind-like 2 (Drosophila)                                 | 62    | 176  | 2.846     | genic&downstr. reg. |
| MmugDNA.18778.1.S1_at   | HPGD        | hydroxyprostaglandin dehydrogenase 15-(NAD)                    | 115   | 324  | 2.813     | transcripts         |
| MmugDNA.14310.1.S1_at   | ALCAM       | activated leukocyte cell adhesion molecule                     | 993   | 2687 | 2.707     | transcripts         |
| Mmu.15280.1.S1_at       | ---         | ---                                                            | 443   | 1191 | 2.688     | ---                 |

|                         |                     |                                                                                                                                                |      |      |       |                     |
|-------------------------|---------------------|------------------------------------------------------------------------------------------------------------------------------------------------|------|------|-------|---------------------|
| MmugDNA.39582.1.S1_at   | SLC7A2              | solute carrier family 7 (cationic amino acid transporter,y system),member 2                                                                    | 75   | 192  | 2.565 | transcripts         |
| MmugDNA.38804.1.S1_at   | INPP4A              | inositol polyphosphate-4-phosphatase,type I,107kDa                                                                                             | 134  | 340  | 2.538 | transcripts         |
| Mmu.7053.1.S1_at        | AKR1C1              | aldo-keto reductase family 1,member C1 (dihydrodiol dehydrogenase 1; 20-alpha (3-alpha)-hydroxysteroid dehydrogenase)                          | 41   | 102  | 2.483 | transcripts         |
| MmugDNA.7064.1.S1_at    | ---                 | ---                                                                                                                                            | 173  | 429  | 2.480 | ---                 |
| MmugDNA.14528.1.S1_s_at | DCN                 | decorin                                                                                                                                        | 199  | 492  | 2.474 | transcripts         |
| MmugDNA.36292.1.S1_at   | FAM110B             | family with sequence similarity 110, member B                                                                                                  | 106  | 263  | 2.472 | genic&downstr. reg. |
| MmugDNA.18446.1.S1_s_at | AKR1C2              | aldo-keto reductase family 1,member C2 (dihydrodiol dehydrogenase 2; bile acid binding protein; 3-alpha hydroxysteroid dehydrogenase,type III) | 2731 | 6685 | 2.448 | transcripts         |
| MmugDNA.41363.1.S1_at   | FOXO1               | forkhead box O1                                                                                                                                | 95   | 231  | 2.438 | genic&downstr. reg. |
| MmugDNA.1995.1.S1_at    | SND1                | staphylococcal nuclease and tudor domain containing 1                                                                                          | 70   | 171  | 2.427 | genic&downstr. reg. |
| MmugDNA.36491.1.S1_s_at | AKR1C2              | aldo-keto reductase family 1,member C2 (dihydrodiol dehydrogenase 2; bile acid binding protein; 3-alpha hydroxysteroid dehydrogenase,type III) | 1775 | 4299 | 2.422 | transcripts         |
| MmugDNA.14736.1.S1_at   | ---                 | ---                                                                                                                                            | 144  | 346  | 2.404 | ---                 |
| MmugDNA.37278.1.S1_at   | EID3                | EP300 interacting inhibitor of differentiation 3                                                                                               | 108  | 256  | 2.371 | transcripts         |
| MmuSTS.1355.1.S1_at     | ALDH9A1             | aldehyde dehydrogenase 9 family,member A1                                                                                                      | 846  | 1997 | 2.359 | transcripts         |
| MmuSTS.2738.1.S1_at     | ADAMTS1             | ADAM metalloproteinase with thrombospondin type 1 motif, 1                                                                                     | 294  | 685  | 2.332 | transcripts         |
| MmuSTS.138.1.S1_at      | PRICKLE1            | prickle homolog 1 (Drosophila)                                                                                                                 | 146  | 339  | 2.326 | transcripts         |
| MmugDNA.26078.1.S1_at   | CPEB4               | cytoplasmic polyadenylation element binding protein 4                                                                                          | 59   | 136  | 2.316 | transcripts         |
| MmugDNA.22489.1.S1_at   | MYST3               | MYST histone acetyltransferase (monocytic leukemia) 3                                                                                          | 615  | 1406 | 2.286 | transcripts         |
| MmugDNA.27647.1.S1_at   | BMPR1B              | bone morphogenetic protein receptor,type IB                                                                                                    | 55   | 126  | 2.284 | transcripts         |
| MmugDNA.13802.1.S1_at   | DCN                 | decorin                                                                                                                                        | 206  | 468  | 2.267 | transcripts         |
| MmuSTS.1244.1.S1_at     | PKN2                | protein kinase N2                                                                                                                              | 40   | 91   | 2.255 | transcripts         |
| Mmu.1738.2.S1_at        | SPAG11A /// SPAG11B | sperm associated antigen 11A /// sperm associated antigen 11B                                                                                  | 90   | 202  | 2.248 | transcripts         |
| MmugDNA.6354.1.S1_at    | ---                 | ---                                                                                                                                            | 115  | 259  | 2.242 | ---                 |
| MmugDNA.20967.1.S1_at   | PABPC1              | poly(A) binding protein, cytoplasmic 1                                                                                                         | 77   | 173  | 2.236 | genic&downstr. reg. |
| MmugDNA.33327.1.S1_s_at | COL4A3              | collagen,type IV,alpha 3 (Goodpasture antigen)                                                                                                 | 106  | 235  | 2.214 | transcripts         |
| MmuSTS.837.1.S1_at      | DPP8                | dipeptidyl-peptidase 8                                                                                                                         | 225  | 493  | 2.193 | transcripts         |



|                         |           |                                                                                          |      |      |       |                     |
|-------------------------|-----------|------------------------------------------------------------------------------------------|------|------|-------|---------------------|
| MmugDNA.4591.1.S1_at    | ---       | ---                                                                                      | 53   | 114  | 2.164 | ---                 |
| MmugDNA.881.1.S1_at     | ---       | ---                                                                                      | 918  | 1972 | 2.148 | ---                 |
| MmugDNA.38765.1.S1_at   | HNRNPD    | heterogeneous nuclear ribonucleoprotein D (AU-rich element RNA binding protein 1, 37kDa) | 61   | 130  | 2.147 | genic&downstr. reg. |
| MmugDNA.38484.1.S1_at   | KCNJ8     | potassium inwardly-rectifying channel,subfamily J,member 8                               | 359  | 770  | 2.145 | transcripts         |
| MmugDNA.6175.1.S1_at    | TFPI      | tissue factor pathway inhibitor (lipoprotein-associated coagulation inhibitor)           | 51   | 109  | 2.141 | genic&downstr. reg. |
| MmugDNA.789.1.S1_at     | RORA      | RAR-related orphan receptor A                                                            | 254  | 541  | 2.130 | transcripts         |
| MmuSTS.1717.1.S1_at     | AKAP4     | A kinase (PRKA) anchor protein 4                                                         | 41   | 86   | 2.124 | transcripts         |
| MmugDNA.26193.1.S1_at   | RORA      | RAR-related orphan receptor A                                                            | 890  | 1863 | 2.092 | transcripts         |
| MmugDNA.24173.1.S1_at   | MAML2     | mastermind-like 2 (Drosophila)                                                           | 156  | 326  | 2.088 | genic&downstr. reg. |
| MmuSTS.46.1.S1_at       | ALG6      | asparagine-linked glycosylation 6,alpha-1,3-glucosyltransferase homolog (S. cerevisiae)  | 129  | 268  | 2.078 | transcripts         |
| MmugDNA.30781.1.S1_at   | C9orf95   | chromosome 9 open reading frame 95                                                       | 1063 | 2201 | 2.071 | transcripts         |
| MmugDNA.18731.1.S1_at   | TNFRSF11A | tumor necrosis factor receptor superfamily, member 11a, NFKB activator                   | 43   | 90   | 2.066 | genic&downstr. reg. |
| MmugDNA.606.1.S1_at     | RHOQ      | ras homolog gene family,member Q                                                         | 119  | 244  | 2.052 | transcripts         |
| MmugDNA.32965.1.S1_at   | DCN       | decorin                                                                                  | 80   | 162  | 2.017 | transcripts         |
| MmugDNA.738.1.S1_at     | BTC       | betacellulin                                                                             | 419  | 843  | 2.012 | genic&downstr. reg. |
| MmugDNA.33589.1.S1_at   | CHODL     | chondrolectin                                                                            | 887  | 1758 | 1.982 | transcripts         |
| MmugDNA.41838.1.S1_x_at | MT1X      | metallothionein 1X                                                                       | 307  | 602  | 1.961 | transcripts         |
| MmugDNA.41838.1.S1_at   | MT1X      | metallothionein 1X                                                                       | 286  | 560  | 1.955 | transcripts         |
| MmugDNA.43209.1.S1_at   | ACPP      | acid phosphatase,prostate                                                                | 3570 | 6937 | 1.943 | transcripts         |
| MmugDNA.13537.1.S1_s_at | CYP2B6    | cytochrome P450,family 2,subfamily B,polypeptide 6                                       | 100  | 192  | 1.927 | transcripts         |
| MmugDNA.36345.1.S1_at   | AUTS2     | autism susceptibility candidate 2                                                        | 245  | 469  | 1.914 | transcripts         |
| MmuSTS.2094.1.S1_at     | RBMS3     | RNA binding motif,single stranded interacting protein                                    | 315  | 598  | 1.900 | transcripts         |
| MmugDNA.28098.1.S1_at   | ---       | ---                                                                                      | 151  | 286  | 1.892 | ---                 |
| MmuSTS.2560.1.S1_at     | TOX       | thymocyte selection-associated high mobility group box                                   | 131  | 245  | 1.873 | transcripts         |
| MmugDNA.8802.1.S1_at    | SHC4      | SHC (Src homology 2 domain containing) family,member 4                                   | 1227 | 2294 | 1.869 | transcripts         |
| Mmu.7287.1.S1_at        | SLC7A2    | solute carrier family 7 (cationic amino acid transporter, y+ system), member 2           | 66   | 122  | 1.845 | genic&downstr. reg. |
| MmugDNA.2278.1.S1_at    | A2BP1     | ataxin 2-binding protein 1                                                               | 158  | 290  | 1.833 | transcripts         |
| MmugDNA.18400.1.S1_at   | RORA      | RAR-related orphan receptor A                                                            | 131  | 239  | 1.825 | transcripts         |
| MmugDNA.17758.1.S1_at   | KCNG3     | potassium voltage-gated channel,subfamily G,member 3                                     | 842  | 1536 | 1.825 | transcripts         |

|                       |         |                                                       |      |      |       |                     |
|-----------------------|---------|-------------------------------------------------------|------|------|-------|---------------------|
| MmuSTS.1880.1.S1_at   | COL4A2  | collagen,type IV,alpha 2                              | 653  | 1190 | 1.822 | transcripts         |
| MmugDNA.19859.1.S1_at | TMEM144 | transmembrane protein 144                             | 51   | 89   | 1.754 | transcripts         |
| MmugDNA.40814.1.S1_at | ACPL2   | acid phosphatase-like 2                               | 1532 | 2631 | 1.718 | transcripts         |
| MmugDNA.7355.1.S1_at  | ---     | ---                                                   | 168  | 286  | 1.705 | ---                 |
| MmugDNA.23310.1.S1_at | SEPT6   | septin 6                                              | 927  | 1574 | 1.698 | transcripts         |
| MmugDNA.9695.1.S1_at  | NAA25   | N(alpha)-acetyltransferase 25, NatB auxiliary subunit | 69   | 107  | 1.557 | genic&downstr. reg. |

---
