# Supplementary material
Source: PubMed Central journal article supplement (PMC4385968)
Supplement: tableS3.pdf [file tableS3.pdf]

**Table S3. Biofunctions identified by IPA for genes affected in summer granulosa cells**

| Category                                                                                                                                                | Functions      | Functions Annotation                 | Num. of Molecules | Predicted Activation State | Activation z-score | p-Value               | Molecules                                                                                                                                                                                                                                                          |
|---------------------------------------------------------------------------------------------------------------------------------------------------------|----------------|--------------------------------------|-------------------|----------------------------|--------------------|-----------------------|--------------------------------------------------------------------------------------------------------------------------------------------------------------------------------------------------------------------------------------------------------------------|
| Cardiovascular System Development and Function   Tissue Development                                                                                     | development    | development of cardiovascular tissue | 5                 | Decreased                  | -1.969             | 2.59×10 <sup>-2</sup> | ↑↑ANGPTL1, ↓↓F2RL1, ↑↑PTPRM, ↑↑TFPI, ↑↑TGFB3                                                                                                                                                                                                                       |
| Cardiovascular System Development and Function   Cellular Development   Cellular Growth and Proliferation   Organismal Development   Tissue Development | proliferation  | proliferation of endothelial cells   | 4                 | Decreased                  | -1.969             | 3.19×10 <sup>-2</sup> | ↑↑ANGPTL1, ↓↓F2RL1, ↑↑PTPRM, ↑↑TFPI                                                                                                                                                                                                                                |
| Cardiovascular System Development and Function                                                                                                          | development    | development of cardiovascular system | 9                 |                            | -1.510             | 3.97×10 <sup>-2</sup> | ↑↑ALCAM, ↑↑ANGPTL1, ↓↓F2RL1, ↑↑HOPX, ↓↓MYCN, ↓↓PTGER3, ↑↑PTPRM, ↑↑TFPI, ↑↑TGFB3                                                                                                                                                                                    |
| Cardiovascular System Development and Function   Organismal Development                                                                                 | vasculogenesis | vasculogenesis                       | 7                 |                            | -1.464             | 3.59×10 <sup>-2</sup> | ↑↑ALCAM, ↑↑ANGPTL1, ↓↓F2RL1, ↓↓PTGER3, ↑↑PTPRM, ↑↑TFPI, ↑↑TGFB3                                                                                                                                                                                                    |
| Cellular Growth and Proliferation                                                                                                                       | proliferation  | proliferation of cells               | 28                |                            | -1.241             | 2.63×10 <sup>-3</sup> | ↓↓AKR1B10, ↑↑AKR1C1/AKR1C2, ↑↑ALCAM, ↑↑ANGPTL1, ↑↑ARID5B, ↑↑COL14A1, ↑↑EZR, ↓↓F2RL1, ↓↓GPX4, ↑↑H2AFY, ↑↑HOPX, ↑↑INPP4A, ↓↓MAFB, ↑↑MLLT3, ↓↓MT-ND2, ↑↑MT3, ↓↓MYCN, ↑↑PRICKLE2, ↑↑PTPRM, ↑↑RORA, ↑↑SLC20A1, ↓↓SLC26A2, ↓↓STC2, ↑↑TFG, ↑↑TFPI, ↑↑TGFB3, ↑↑TJP1, ↑↑VWF |
| Lipid Metabolism   Small Molecule Biochemistry                                                                                                          | metabolism     | fatty acid metabolism                | 6                 |                            | 1.154              | 3.51×10 <sup>-2</sup> | ↑↑ACSL3, ↑↑AKR1C1/AKR1C2, ↓↓F2RL1, ↓↓GPX4, ↑↑MDH1, ↑↑VWF                                                                                                                                                                                                           |
| Neurological Disease                                                                                                                                    | damage         | damage of nervous system             | 4                 |                            | -1.067             | 4.74×10 <sup>-3</sup> | ↓↓F2RL1, ↑↑MT3, ↓↓PTGER3, ↑↑VWF                                                                                                                                                                                                                                    |
| Developmental Disorder                                                                                                                                  | growth failure | Growth Failure                       | 7                 |                            | -0.896             | 2.19×10 <sup>-2</sup> | ↑↑ARID5B, ↓↓MYCN, ↑↑REV3L, ↓↓SHISA2, ↑↑SLC20A1, ↑↑SYNE1, ↑↑TFPI                                                                                                                                                                                                    |
| Cardiovascular Disease                                                                                                                                  | heart disease  | Heart Disease                        | 9                 |                            | 0.849              | 3.46×10 <sup>-2</sup> | ↓↓F2RL1, ↑↑HOPX, ↓↓MYCN, ↑↑PTPRM, ↑↑RBFOX1, ↑↑SLC20A1, ↑↑TFPI, ↑↑TGFB3, ↑↑VWF                                                                                                                                                                                      |

|                                                                        |                        |                                       |    |        |                       |                                                                                                                                                                                                                                          |
|------------------------------------------------------------------------|------------------------|---------------------------------------|----|--------|-----------------------|------------------------------------------------------------------------------------------------------------------------------------------------------------------------------------------------------------------------------------------|
| Cell-To-Cell Signaling and Interaction                                 | binding                | binding of cells                      | 6  | 0.701  | $1.92 \times 10^{-2}$ | ↑↑ALCAM, ↑↑ANGPTL1, ↑↑DNAJC1, ↑↑PTPRM, ↑↑TFPI, ↑↑VWF                                                                                                                                                                                     |
| Cellular Development   Cellular Growth and Proliferation               | proliferation          | proliferation of tumor cell lines     | 12 | -0.676 | $4.24 \times 10^{-2}$ | ↓↓AKR1B10, ↑↑ANGPTL1, ↑↑COL14A1, ↑↑EZR, ↓↓F2RL1, ↑↑H2AFY, ↑↑MLLT3, ↓↓MT-ND2, ↓↓MYCN, ↑↑RORA, ↓↓SLC26A2, ↑↑TGFB3                                                                                                                          |
| Organismal Survival                                                    | neonatal death         | neonatal death                        | 6  | -0.420 | $1.51 \times 10^{-2}$ | ↑↑ARID5B, ↓↓F2RL1, ↓↓MAFB, ↓↓MYCN, ↑↑SYNE1, ↑↑TFPI                                                                                                                                                                                       |
| Cellular Movement                                                      | cell movement          | cell movement                         | 16 | -0.234 | $2.10 \times 10^{-2}$ | ↑↑ALCAM, ↑↑ANGPTL1, ↑↑ANKRD28, ↑↑ARID5B, ↑↑EZR, ↓↓F2RL1, ↑↑GPM6A, ↓↓MAFB, ↑MARK1, ↓↓NAV1, ↓↓PTGER3, ↑↑PTPRM, ↑↑TFPI, ↑↑TGFB3, ↑↑TJP1, ↑↑VWF                                                                                              |
| Cellular Assembly and Organization   Cellular Function and Maintenance | organization           | microtubule dynamics                  | 13 | -0.164 | $7.19 \times 10^{-4}$ | ↑↑CRIPT, ↑↑EZR, ↓↓F2RL1, ↑↑GPM6A, ↓↓GPX4, ↑↑MAP9, ↑MARK1, ↑↑MID1, ↑↑MT3, ↑↑PRICKLE2, ↑↑PTPRM, ↑↑SYNE1, ↑↑VWF                                                                                                                             |
| Cellular Movement                                                      | migration              | migration of cells                    | 14 | -0.076 | $3.69 \times 10^{-2}$ | ↑↑ALCAM, ↑↑ANGPTL1, ↑↑ANKRD28, ↑↑ARID5B, ↑↑EZR, ↓↓F2RL1, ↑↑GPM6A, ↓↓MAFB, ↑MARK1, ↓↓NAV1, ↓↓PTGER3, ↑↑PTPRM, ↑↑TFPI, ↑↑VWF                                                                                                               |
| Cellular Growth and Proliferation                                      | formation              | formation of neuroblastoma cell lines | 2  |        | $1.34 \times 10^{-5}$ | ↑↑PRICKLE1, ↑↑PRICKLE2                                                                                                                                                                                                                   |
| Cancer                                                                 | endometrioid carcinoma | endometrioid carcinoma                | 24 |        | $3.61 \times 10^{-4}$ | ↑↑AKR1C1/AKR1C2, ↓ALAS1, ↑↑ANKRD28, ↑↑ARID5B, ↓↓C8orf47, ↑↑COL14A1, ↓↓GALNT7, ↓↓HMCN1, ↑↑INPP4A, ↓↓KCNAB1, ↑MARK1, ↑↑MDH1, ↑↑MLLT3, ↓↓MYCN, ↓↓NAV1, ↑↑PTPRM, ↑↑REV3L, ↑↑SLC20A1, ↑↑SYNE1, ↓↓TMEM106B, ↑TMEM87A, ↓↓VAT1L, ↑↑VWF, ↑↑ZNF614 |
| Cancer                                                                 | uterine tumor          | uterine tumor                         | 11 |        | $4.78 \times 10^{-4}$ | ↑↑COL14A1, ↑DR1, ↓↓F2RL1, ↑↑GPM6A, ↑↑H2AFY, ↑↑HOPX, ↑↑MDH1, ↓↓PTGER3, ↑↑RORA, ↑↑TFPI, ↑↑TGFB3                                                                                                                                            |

|                                                                                                                                                                               |                                      |                                      |    |                       |                                                                                                                                                                                                                                                                                                                     |
|-------------------------------------------------------------------------------------------------------------------------------------------------------------------------------|--------------------------------------|--------------------------------------|----|-----------------------|---------------------------------------------------------------------------------------------------------------------------------------------------------------------------------------------------------------------------------------------------------------------------------------------------------------------|
| Developmental Disorder   Organismal Injury and Abnormalities   Reproductive System Disease                                                                                    | congenital anomaly of genital system | congenital anomaly of genital system | 3  | 5.69×10 <sup>-4</sup> | ↑↑AKR1C1/AKR1C2, ↑↑ARID5B, ↑↑MID1                                                                                                                                                                                                                                                                                   |
| Developmental Disorder   Hereditary Disorder   Metabolic Disease   Neurological Disease   Ophthalmic Disease   Skeletal and Muscular Disorders                                | Leber's optic atrophy                | Leber's optic atrophy                | 2  | 5.91×10 <sup>-4</sup> | ↓↓MT-ND2, ↓↓MT-ND4L                                                                                                                                                                                                                                                                                                 |
| Digestive System Development and Function   Embryonic Development   Hepatic System Development and Function   Organ Development   Organismal Development   Tissue Development | development                          | development of liver                 | 4  | 6.77×10 <sup>-4</sup> | ↓↓MYCN, ↑↑SLC20A1, ↑↑TGFB3, ↑↑VWF                                                                                                                                                                                                                                                                                   |
| Cancer                                                                                                                                                                        | malignant neoplasm of abdomen        | malignant neoplasm of abdomen        | 34 | 7.27×10 <sup>-4</sup> | ↑↑ACSL3, ↓↓AKR1B10, ↑↑AKR1C1/AKR1C2, ↓ALAS1, ↑↑ALCAM, ↑↑ANKRD28, ↑↑ANXA4, ↑↑COL14A1, ↑↑EZR, ↓↓F2RL1, ↑↑FAM13A, ↑↑GPM6A, ↑↑H2AFY, ↓↓HMCN1, ↓↓LYZ, ↓↓MAFB, ↑↑MAP9, ↑MARK1, ↑↑MDH1, ↑↑MID1, ↑↑MLLT3, ↓↓MT-ND4L, ↓↓MYCN, ↓↓PTGER3, ↑↑PTPRM, ↑↑REV3L, ↑↑RORA, ↓↓SLC26A2, ↓↓SVIL, ↑↑SYNE1, ↑↑TFPI, ↑↑TGFB3, ↑↑TJP1, ↑↑VWF |
| Cancer   Gastrointestinal Disease                                                                                                                                             | metastatic colorectal cancer         | metastatic colorectal cancer         | 5  | 7.96×10 <sup>-4</sup> | ↑↑AKR1C1/AKR1C2, ↓↓MAFB, ↑↑REV3L, ↑↑TFPI, ↑↑TGFB3                                                                                                                                                                                                                                                                   |
| Embryonic Development   Tissue Development                                                                                                                                    | growth                               | growth of embryonic tissue           | 3  | 9.29×10 <sup>-4</sup> | ↓↓F2RL1, ↓↓MYCN, ↑↑REV3L                                                                                                                                                                                                                                                                                            |

|                                               |                                      |                                      |    |                       |                                                                                                                                                                                                                                                                                                                                                                                                                                                         |
|-----------------------------------------------|--------------------------------------|--------------------------------------|----|-----------------------|---------------------------------------------------------------------------------------------------------------------------------------------------------------------------------------------------------------------------------------------------------------------------------------------------------------------------------------------------------------------------------------------------------------------------------------------------------|
| Cancer                                        | solid tumor                          | solid tumor                          | 40 | 1.16×10 <sup>-3</sup> | ↑↑ACSL3, ↓↓AKR1B10, ↑↑AKR1C1/AKR1C2, ↓ALAS1, ↑↑ALCAM, ↑↑ANGPTL1, ↑↑ANKRD28, ↑↑ANXA4, ↑↑ARID5B, ↑↑COL14A1, ↑↑EZR, ↓↓F2RL1, ↑↑FAM13A, ↑↑GPM6A, ↑↑H2AFY, ↓↓HMCN1, ↓↓MAFB, ↑↑MAP9, ↑MARK1, ↑↑MDH1, ↑↑MID1, ↑↑MLLT3, ↓↓MT-ND2, ↓↓MT-ND4L, ↓↓MYCN, ↑↑PGAP1, ↑↑PRICKLE1, ↑↑PTPRM, ↑↑REV3L, ↑↑RORA, ↓↓SHISA2, ↓↓SVIL, ↑↑SYNE1, ↑↑TFG, ↑↑TFPI, ↑↑TGFB3, ↑↑TJP1, ↓↓TMEM106B, ↑↑VWF, ↑↑ZNF614                                                                      |
| Hereditary Disorder  <br>Neurological Disease | progressive<br>myoclonic<br>epilepsy | progressive<br>myoclonic<br>epilepsy | 2  | 1.36×10 <sup>-3</sup> | ↑↑PRICKLE1, ↑↑PRICKLE2                                                                                                                                                                                                                                                                                                                                                                                                                                  |
| Cancer                                        | cancer                               | Cancer                               | 47 | 1.52×10 <sup>-3</sup> | ↑↑ACSL3, ↓↓AKR1B10, ↑↑AKR1C1/AKR1C2, ↓ALAS1, ↑↑ALCAM, ↑↑ANGPTL1, ↑↑ANKRD28, ↑↑ANXA4, ↑↑ARID5B, ↑↑COL14A1, ↑↑CRIPT, ↑↑EZR, ↓↓F2RL1, ↑↑FAM13A, ↑↑GPM6A, ↑↑H2AFY, ↓↓HMCN1, ↓↓KCNAB1, ↓↓LYZ, ↓↓MAFB, ↑↑MAP9, ↑MARK1, ↑↑MDH1, ↑↑MID1, ↑↑MLLT3, ↓↓MT-ND2, ↓↓MT-ND4L, ↓↓MYCN, ↑↑PGAP1, ↑↑PRICKLE1, ↑↑PRICKLE2, ↓↓PTGER3, ↑↑PTPRM, ↑↑RBFOX1, ↑↑REV3L, ↑↑RORA, ↓↓SHISA2, ↓↓SLC26A2, ↓↓SVIL, ↑↑SYNE1, ↑↑TFG, ↑↑TFPI, ↑↑TGFB3, ↑↑TJP1, ↓↓TMEM106B, ↑↑VWF, ↑↑ZNF614 |
| Cancer                                        | benign<br>neoplasia                  | benign<br>neoplasia                  | 10 | 1.54×10 <sup>-3</sup> | ↑↑ALCAM, ↑↑ANGPTL1, ↑DR1, ↑↑GPM6A, ↑↑HOPX, ↑↑MDH1, ↓↓PTGER3, ↑↑PTPRM, ↑↑RORA, ↑↑TGFB3                                                                                                                                                                                                                                                                                                                                                                   |

|                                   |                                       |                                       |    |                       |                                                                                                                                                                                                                                                                                                                                                                             |
|-----------------------------------|---------------------------------------|---------------------------------------|----|-----------------------|-----------------------------------------------------------------------------------------------------------------------------------------------------------------------------------------------------------------------------------------------------------------------------------------------------------------------------------------------------------------------------|
| Cancer   Gastrointestinal Disease | colorectal cancer                     | colorectal cancer                     | 27 | 1.70×10 <sup>-3</sup> | ↑↑ACSL3, ↑↑AKR1C1/AKR1C2, ↓ALAS1, ↑↑ALCAM, ↑↑ANKRD28, ↑↑ANXA4, ↑↑COL14A1, ↓↓F2RL1, ↑↑H2AFY, ↓↓HMCN1, ↓↓MAFB, ↑↑MAP9, ↑MARK1, ↑↑MDH1, ↑↑MID1, ↑↑MLLT3, ↓↓MT-ND4L, ↓↓MYCN, ↑↑PTPRM, ↑↑REV3L, ↓↓SLC26A2, ↓↓SVIL, ↑↑SYNE1, ↑↑TFPI, ↑↑TGFB3, ↑↑TJP1, ↑↑VWF                                                                                                                       |
| Cardiovascular Disease            | unstable angina                       | unstable angina                       | 2  | 1.76×10 <sup>-3</sup> | ↓↓F2RL1, ↑↑TFPI                                                                                                                                                                                                                                                                                                                                                             |
| Cardiovascular Disease            | peripheral arterial occlusive disease | peripheral arterial occlusive disease | 5  | 1.81×10 <sup>-3</sup> | ↑↑KCTD12, ↓↓MAFB, ↑MARK1, ↓↓PTGER3, ↑↑USP15                                                                                                                                                                                                                                                                                                                                 |
| Cancer   Gastrointestinal Disease | digestive organ tumor                 | digestive organ tumor                 | 30 | 1.88×10 <sup>-3</sup> | ↑↑ACSL3, ↓↓AKR1B10, ↑↑AKR1C1/AKR1C2, ↓ALAS1, ↑↑ALCAM, ↑↑ANKRD28, ↑↑ANXA4, ↑↑COL14A1, ↑↑EZR, ↓↓F2RL1, ↑↑H2AFY, ↓↓HMCN1, ↓↓MAFB, ↑↑MAP9, ↑MARK1, ↑↑MDH1, ↑↑MID1, ↑↑MLLT3, ↓↓MT-ND4L, ↓↓MYCN, ↑↑PTPRM, ↑↑REV3L, ↑↑RORA, ↓↓SLC26A2, ↓↓SVIL, ↑↑SYNE1, ↑↑TFPI, ↑↑TGFB3, ↑↑TJP1, ↑↑VWF                                                                                             |
| Cancer                            | carcinoma                             | carcinoma                             | 39 | 2.04×10 <sup>-3</sup> | ↑↑ACSL3, ↓↓AKR1B10, ↑↑AKR1C1/AKR1C2, ↓ALAS1, ↑↑ALCAM, ↑↑ANGPTL1, ↑↑ANKRD28, ↑↑ANXA4, ↑↑ARID5B, ↑↑COL14A1, ↑↑EZR, ↓↓F2RL1, ↑↑FAM13A, ↑↑GPM6A, ↑↑H2AFY, ↓↓HMCN1, ↓↓MAFB, ↑↑MAP9, ↑MARK1, ↑↑MDH1, ↑↑MID1, ↑↑MLLT3, ↓↓MT-ND2, ↓↓MT-ND4L, ↓↓MYCN, ↑↑PGAP1, ↑↑PRICKLE1, ↑↑PTPRM, ↑↑REV3L, ↑↑RORA, ↓↓SHISA2, ↓↓SVIL, ↑↑SYNE1, ↑↑TFPI, ↑↑TGFB3, ↑↑TJP1, ↓↓TMEM106B, ↑↑VWF, ↑↑ZNF614 |

|                                                                            |                                 |                                  |    |                       |                                                                                                                                                                                                                                                                                                                                                                                       |
|----------------------------------------------------------------------------|---------------------------------|----------------------------------|----|-----------------------|---------------------------------------------------------------------------------------------------------------------------------------------------------------------------------------------------------------------------------------------------------------------------------------------------------------------------------------------------------------------------------------|
| Cancer   Gastrointestinal Disease                                          | gastrointestinal tract cancer   | gastrointestinal tract cancer    | 28 | 2.41×10 <sup>-3</sup> | ↑↑ACSL3, ↑↑AKR1C1/AKR1C2, ↓ALAS1, ↑↑ALCAM, ↑↑ANKRD28, ↑↑ANXA4, ↑↑COL14A1, ↑↑EZR, ↓↓F2RL1, ↑↑H2AFY, ↓↓HMCN1, ↓↓MAFB, ↑↑MAP9, ↑MARK1, ↑↑MDH1, ↑↑MID1, ↑↑MLLT3, ↓↓MT-ND4L, ↓↓MYCN, ↑↑PTPRM, ↑↑REV3L, ↓↓SLC26A2, ↓↓SVIL, ↑↑SYNE1, ↑↑TFPI, ↑↑TGFB3, ↑↑TJP1, ↑↑VWF                                                                                                                          |
| Cancer                                                                     | epithelial neoplasia            | epithelial neoplasia             | 40 | 2.51×10 <sup>-3</sup> | ↑↑ACSL3, ↓↓AKR1B10, ↑↑AKR1C1/AKR1C2, ↓ALAS1, ↑↑ALCAM, ↑↑ANGPTL1, ↑↑ANKRD28, ↑↑ANXA4, ↑↑ARID5B, ↑↑COL14A1, ↑↑EZR, ↓↓F2RL1, ↑↑FAM13A, ↑↑GPM6A, ↑↑H2AFY, ↓↓HMCN1, ↓↓KCNAB1, ↓↓MAFB, ↑↑MAP9, ↑MARK1, ↑↑MDH1, ↑↑MID1, ↑↑MLLT3, ↓↓MT-ND2, ↓↓MT-ND4L, ↓↓MYCN, ↑↑PGAP1, ↑↑PRICKLE1, ↑↑PTPRM, ↑↑REV3L, ↑↑RORA, ↓↓SHISA2, ↓↓SVIL, ↑↑SYNE1, ↑↑TFPI, ↑↑TGFB3, ↑↑TJP1, ↓↓TMEM106B, ↑↑VWF, ↑↑ZNF614 |
| Cellular Assembly and Organization                                         | formation                       | formation of microtubule bundles | 2  | 2.95×10 <sup>-3</sup> | ↓↓NAV1, ↑↑VWF                                                                                                                                                                                                                                                                                                                                                                         |
| Small Molecule Biochemistry                                                | metabolism                      | metabolism of aldehyde           | 2  | 2.95×10 <sup>-3</sup> | ↓↓AKR1B10, ↑↑ALDH9A1                                                                                                                                                                                                                                                                                                                                                                  |
| Cancer   Organismal Injury and Abnormalities   Reproductive System Disease | uterine serous papillary cancer | uterine serous papillary cancer  | 5  | 3.08×10 <sup>-3</sup> | ↑↑COL14A1, ↓↓F2RL1, ↑↑GPM6A, ↓↓PTGER3, ↑↑TGFB3                                                                                                                                                                                                                                                                                                                                        |
| Cancer                                                                     | uterine leiomyoma               | uterine leiomyoma                | 5  | 3.43×10 <sup>-3</sup> | ↑DR1, ↑↑GPM6A, ↑↑HOPX, ↑↑MDH1, ↑↑RORA                                                                                                                                                                                                                                                                                                                                                 |
| Embryonic Development   Organismal Development                             | development                     | development of blastocyst        | 3  | 3.44×10 <sup>-3</sup> | ↑↑REV3L, ↑↑TGFB3, ↑↑TJP1                                                                                                                                                                                                                                                                                                                                                              |
| Organismal Injury and Abnormalities                                        | blood clot                      | blood clot                       | 3  | 3.56×10 <sup>-3</sup> | ↓↓PTGER3, ↑↑TFPI, ↑↑VWF                                                                                                                                                                                                                                                                                                                                                               |

|                                                                                          |                      |                                          |   |                                                                                                     |
|------------------------------------------------------------------------------------------|----------------------|------------------------------------------|---|-----------------------------------------------------------------------------------------------------|
| Organismal Injury and Abnormalities   Reproductive System Disease                        | spontaneous abortion | spontaneous abortion                     | 2 | 4.75×10 <sup>-3</sup> ↓↓PTGER3, ↑↑TFPI                                                              |
| Cell Morphology   Cellular Assembly and Organization   Cellular Function and Maintenance | reorganization       | reorganization of actin cytoskeleton     | 3 | 4.90×10 <sup>-3</sup> ↑↑EZR, ↓↓F2RL1, ↑↑VWF                                                         |
| Lipid Metabolism   Small Molecule Biochemistry                                           | metabolism           | metabolism of prostaglandin              | 4 | 5.40×10 <sup>-3</sup> ↑↑AKR1C1/AKR1C2, ↓↓F2RL1, ↓↓GPX4, ↑↑VWF                                       |
| Lipid Metabolism   Small Molecule Biochemistry                                           | reduction            | reduction of lipid                       | 2 | 5.81×10 <sup>-3</sup> ↑↑AKR1C1/AKR1C2, ↓↓GPX4                                                       |
| Cardiovascular Disease                                                                   | disorder of artery   | disorder of artery                       | 9 | 6.02×10 <sup>-3</sup> ↑↑KCTD12, ↓↓MAFB, ↑MARK1, ↓↓PTGER3, ↑↑PTPRM, ↑↑RBFOX1, ↑↑TFPI, ↑↑USP15, ↑↑VWF |
| Cell Morphology                                                                          | morphology           | morphology of breast cancer cell lines   | 2 | 6.96×10 <sup>-3</sup> ↑↑EZR, ↑↑RORA                                                                 |
| Cancer                                                                                   | hemangioma           | hemangioma                               | 3 | 7.04×10 <sup>-3</sup> ↑↑ALCAM, ↑↑ANGPTL1, ↑↑TGFB3                                                   |
| Cancer                                                                                   | metastasis           | metastasis                               | 8 | 7.28×10 <sup>-3</sup> ↑↑AKR1C1/AKR1C2, ↑↑ANGPTL1, ↑↑EZR, ↓↓MAFB, ↓↓MYCN, ↑↑REV3L, ↑↑TFPI, ↑↑TGFB3   |
| Embryonic Development   Organismal Development                                           | development          | development of abdomen                   | 7 | 7.36×10 <sup>-3</sup> ↑↑ANXA4, ↑↑ARID5B, ↑↑EZR, ↓↓MYCN, ↑↑SLC20A1, ↑↑TGFB3, ↑↑VWF                   |
| Cardiovascular Disease                                                                   | occlusion            | occlusion of artery                      | 8 | 7.39×10 <sup>-3</sup> ↑↑KCTD12, ↓↓MAFB, ↑MARK1, ↓↓PTGER3, ↑↑PTPRM, ↑↑RBFOX1, ↑↑USP15, ↑↑VWF         |
| Cancer   Organismal Injury and Abnormalities   Reproductive System Disease               | endometrial cancer   | endometrial cancer                       | 6 | 7.94×10 <sup>-3</sup> ↑↑COL14A1, ↓↓F2RL1, ↑↑GPM6A, ↑↑H2AFY, ↓↓PTGER3, ↑↑TGFB3                       |
| Cardiovascular Disease   Developmental Disorder                                          | hypoplasia           | hypoplasia of trabeculae carne           | 2 | 8.20×10 <sup>-3</sup> ↓↓MYCN, ↑↑TGFB3                                                               |
| Cellular Function and Maintenance                                                        | elevation            | elevation of Ca <sup>2+</sup> in cytosol | 3 | 9.23×10 <sup>-3</sup> ↓↓F2RL1, ↑↑NPTN, ↓↓PTGER3                                                     |
| Cardiovascular Disease   Organismal Injury and Abnormalities                             | formation            | formation of blood clot                  | 2 | 9.54×10 <sup>-3</sup> ↓↓PTGER3, ↑↑VWF                                                               |

|                                                                                     |                             |                                           |    |                                                                                                             |
|-------------------------------------------------------------------------------------|-----------------------------|-------------------------------------------|----|-------------------------------------------------------------------------------------------------------------|
| Vitamin and Mineral Metabolism                                                      | quantity                    | quantity of mineral                       | 2  | 1.00×10 <sup>-2</sup> ↑↑MT3, ↑↑RORA                                                                         |
| Neurological Disease   Organismal Injury and Abnormalities                          | damage                      | damage of brain                           | 3  | 1.06×10 <sup>-2</sup> ↑↑MT3, ↓↓PTGER3, ↑↑VWF                                                                |
| Cancer   Respiratory Disease                                                        | carcinoma                   | carcinoma in lung                         | 8  | 1.07×10 <sup>-2</sup> ↓↓AKR1B10, ↑↑ANGPTL1, ↑↑EZR, ↓↓MAFB, ↑MARK1, ↑↑MLLT3, ↓↓TMEM106B, ↑↑VWF               |
| Cardiovascular Disease                                                              | vascular disease            | vascular disease                          | 10 | 1.07×10 <sup>-2</sup> ↑↑KCTD12, ↓↓MAFB, ↑MARK1, ↓↓PTGER3, ↑↑PTPRM, ↓↓PYGL, ↑↑RBFOX1, ↑↑TFPI, ↑↑USP15, ↑↑VWF |
| Cancer   Respiratory Disease                                                        | lung cancer                 | lung cancer                               | 9  | 1.09×10 <sup>-2</sup> ↓↓AKR1B10, ↑↑ANGPTL1, ↑↑EZR, ↑↑H2AFY, ↓↓MAFB, ↑MARK1, ↑↑MLLT3, ↓↓TMEM106B, ↑↑VWF      |
| Developmental Disorder   Gastrointestinal Disease   Hepatic System Disease          | hypoplasia                  | hypoplasia of liver                       | 2  | 1.10×10 <sup>-2</sup> ↓↓MYCN, ↑↑SLC20A1                                                                     |
| Cancer   Organismal Injury and Abnormalities   Reproductive System Disease          | uterine cancer              | uterine cancer                            | 7  | 1.11×10 <sup>-2</sup> ↑↑COL14A1, ↓↓F2RL1, ↑↑GPM6A, ↑↑H2AFY, ↓↓PTGER3, ↑↑TFPI, ↑↑TGFB3                       |
| Molecular Transport                                                                 | transport                   | transport of anion                        | 3  | 1.13×10 <sup>-2</sup> ↓↓PTGER3, ↑↑SLC20A1, ↓↓SLC26A2                                                        |
| Tissue Morphology                                                                   | morphology                  | morphology of rhombomere                  | 2  | 1.15×10 <sup>-2</sup> ↓↓MAFB, ↑↑MID1                                                                        |
| Ophthalmic Disease                                                                  | primary open-angle glaucoma | primary open-angle glaucoma               | 2  | 1.15×10 <sup>-2</sup> ↓↓PTGER3, ↑↑TJP1                                                                      |
| Cellular Development   Cellular Growth and Proliferation                            | proliferation               | proliferation of kidney cancer cell lines | 2  | 1.15×10 <sup>-2</sup> ↑↑COL14A1, ↑↑TGFB3                                                                    |
| Cell-To-Cell Signaling and Interaction   Connective Tissue Development and Function | binding                     | binding of fibroblast cell lines          | 2  | 1.20×10 <sup>-2</sup> ↑↑ALCAM, ↑↑TFPI                                                                       |



|                                                                                                                                                                                |                                           |                                           |    |                       |                                                                                                                                                                                                                                                                               |
|--------------------------------------------------------------------------------------------------------------------------------------------------------------------------------|-------------------------------------------|-------------------------------------------|----|-----------------------|-------------------------------------------------------------------------------------------------------------------------------------------------------------------------------------------------------------------------------------------------------------------------------|
| Cell Morphology   Cellular Assembly and Organization   Cellular Development   Cellular Function and Maintenance   Nervous System Development and Function   Tissue Development | morphogenesis                             | morphogenesis of neurites                 | 5  | 1.26×10 <sup>-2</sup> | ↑↑EZR, ↑↑GPM6A, ↑↑PRICKLE2, ↑↑PTPRM, ↑↑SYNE1                                                                                                                                                                                                                                  |
| Cancer                                                                                                                                                                         | adenocarcinoma                            | adenocarcinoma                            | 29 | 1.33×10 <sup>-2</sup> | ↑↑ACSL3, ↑↑AKR1C1/AKR1C2, ↓ALAS1, ↑↑ALCAM, ↑↑ANKRD28, ↑↑ARID5B, ↑↑COL14A1, ↑↑EZR, ↓↓F2RL1, ↑↑FAM13A, ↑↑GPM6A, ↓↓HMCN1, ↑↑MAP9, ↑MARK1, ↑↑MDH1, ↑↑MID1, ↑↑MLLT3, ↓↓MT-ND2, ↓↓MYCN, ↑↑PGAP1, ↑↑PRICKLE1, ↑↑PTPRM, ↑↑REV3L, ↓↓SVIL, ↑↑SYNE1, ↑↑TJP1, ↓↓TMEM106B, ↑↑VWF, ↑↑ZNF614 |
| Embryonic Development   Organ Development   Organ Morphology   Organismal Development   Skeletal and Muscular System Development and Function   Tissue Development             | morphogenesis                             | morphogenesis of muscle                   | 2  | 1.35×10 <sup>-2</sup> | ↑↑ARID5B, ↑↑TGFB3                                                                                                                                                                                                                                                             |
| Cellular Movement   Nervous System Development and Function                                                                                                                    | migration                                 | migration of neurons                      | 4  | 1.36×10 <sup>-2</sup> | ↑↑GPM6A, ↓↓MAFB, ↑MARK1, ↓↓NAV1                                                                                                                                                                                                                                               |
| Immunological Disease   Inflammatory Disease   Inflammatory Response   Neurological Disease                                                                                    | experimental autoimmune encephalomyelitis | experimental autoimmune encephalomyelitis | 4  | 1.51×10 <sup>-2</sup> | ↑↑ALCAM, ↓↓F2RL1, ↑↑RORA, ↑↑VWF                                                                                                                                                                                                                                               |
| Cell-To-Cell Signaling and Interaction   Cellular Compromise   Tissue Development   Tumor Morphology                                                                           | adhesion                                  | adhesion of tumor cells                   | 2  | 1.52×10 <sup>-2</sup> | ↑↑TFPI, ↑↑VWF                                                                                                                                                                                                                                                                 |
| Inflammatory Response                                                                                                                                                          | inflammation                              | inflammation of airway                    | 2  | 1.52×10 <sup>-2</sup> | ↓↓F2RL1, ↓↓PTGER3                                                                                                                                                                                                                                                             |

|                                                                                                                  |                                             |                                             |    |                       |                                                                                                                                                                                                                                                                                      |
|------------------------------------------------------------------------------------------------------------------|---------------------------------------------|---------------------------------------------|----|-----------------------|--------------------------------------------------------------------------------------------------------------------------------------------------------------------------------------------------------------------------------------------------------------------------------------|
| Digestive System<br>Development and Function                                                                     | development                                 | development of<br>digestive system          | 5  | 1.56×10 <sup>-2</sup> | ↑↑ARID5B, ↓↓MYCN, ↑↑SLC20A1,<br>↑↑TGFB3, ↑↑VWF                                                                                                                                                                                                                                       |
| Nervous System<br>Development and Function  <br>Organ Morphology  <br>Organismal Development                     | abnormal<br>morphology                      | abnormal<br>morphology of<br>brain          | 6  | 1.61×10 <sup>-2</sup> | ↑↑MID1, ↑↑MT3, ↓↓MYCN, ↑↑PGAP1,<br>↑↑RORA, ↓↓SHISA2                                                                                                                                                                                                                                  |
| Cellular Development  <br>Cellular Growth and<br>Proliferation   Lymphoid<br>Tissue Structure and<br>Development | proliferation                               | proliferation of<br>bone marrow<br>cells    | 3  | 1.67×10 <sup>-2</sup> | ↑↑INPP4A, ↓↓MAFB, ↑↑VWF                                                                                                                                                                                                                                                              |
| Cancer                                                                                                           | head and neck<br>tumor                      | head and neck<br>tumor                      | 9  | 1.70×10 <sup>-2</sup> | ↑↑ALCAM, ↑↑EZR, ↓↓HMCN1, ↓↓KCNAB1,<br>↓↓MT-ND2, ↓↓MYCN, ↑↑PTPRM,<br>↑↑SYNE1, ↑↑TFPI                                                                                                                                                                                                  |
| Cell Signaling                                                                                                   | I-kappaB<br>kinase/NF-<br>kappaB<br>cascade | I-kappaB<br>kinase/NF-<br>kappaB<br>cascade | 3  | 1.80×10 <sup>-2</sup> | ↓↓F2RL1, ↑↑SLC20A1, ↑↑TFG                                                                                                                                                                                                                                                            |
| Ophthalmic Disease                                                                                               | macular<br>degeneration                     | macular<br>degeneration                     | 2  | 1.81×10 <sup>-2</sup> | ↓↓HMCN1, ↓↓PTGER3                                                                                                                                                                                                                                                                    |
| Cardiovascular Disease  <br>Hematological Disease                                                                | thrombosis                                  | thrombosis of<br>vein                       | 2  | 1.81×10 <sup>-2</sup> | ↑↑TFPI, ↑↑VWF                                                                                                                                                                                                                                                                        |
| Nucleic Acid Metabolism  <br>Small Molecule<br>Biochemistry                                                      | metabolism                                  | metabolism of<br>purine<br>nucleotide       | 3  | 1.83×10 <sup>-2</sup> | ↑↑MDH1, ↓↓MT-ATP8, ↑↑RORA                                                                                                                                                                                                                                                            |
| Cellular Compromise   Lipid<br>Metabolism   Small Molecule<br>Biochemistry                                       | peroxidation                                | peroxidation of<br>lipid                    | 2  | 1.87×10 <sup>-2</sup> | ↓↓GPX4, ↓↓PTGER3                                                                                                                                                                                                                                                                     |
| Cancer                                                                                                           | breast or<br>colorectal<br>cancer           | breast or<br>colorectal<br>cancer           | 28 | 1.89×10 <sup>-2</sup> | ↑↑ACSL3, ↑↑AKR1C1/AKR1C2, ↓ALAS1,<br>↑↑ALCAM, ↑↑ANKRD28, ↑↑ANXA4,<br>↑↑COL14A1, ↓↓F2RL1, ↑↑H2AFY,<br>↓↓HMCN1, ↓↓MAFB, ↑↑MAP9, ↑MARK1,<br>↑↑MDH1, ↑↑MID1, ↑↑MLLT3, ↓↓MT-ND2,<br>↓↓MT-ND4L, ↓↓MYCN, ↑↑PTPRM,<br>↑↑REV3L, ↓↓SLC26A2, ↓↓SVIL, ↑↑SYNE1,<br>↑↑TFPI, ↑↑TGFB3, ↑↑TJP1, ↑↑VWF |

|                                                                                                                                                 |                           |                                  |   |                       |                                                                      |
|-------------------------------------------------------------------------------------------------------------------------------------------------|---------------------------|----------------------------------|---|-----------------------|----------------------------------------------------------------------|
| Cancer                                                                                                                                          | squamous-cell carcinoma   | squamous-cell carcinoma          | 7 | 1.93×10 <sup>-2</sup> | ↑↑AKR1C1/AKR1C2, ↑↑ALCAM, ↑↑EZR, ↓↓HMCN1, ↑↑MLLT3, ↓↓MT-ND4L, ↓↓MYCN |
| Cellular Assembly and Organization   Cellular Compromise                                                                                        | depolymerization          | depolymerization of filaments    | 2 | 1.94×10 <sup>-2</sup> | ↓↓F2RL1, ↑↑MID1                                                      |
| Behavior                                                                                                                                        | grooming                  | grooming                         | 2 | 1.94×10 <sup>-2</sup> | ↑↑ARID5B, ↑↑SYNE1                                                    |
| Cell Signaling   Vitamin and Mineral Metabolism                                                                                                 | signaling                 | signaling of Ca <sup>2+</sup>    | 2 | 1.94×10 <sup>-2</sup> | ↑↑DNAJC1, ↓↓F2RL1                                                    |
| Cell Signaling   Small Molecule Biochemistry                                                                                                    | quantity                  | quantity of nitric oxide         | 2 | 2.00×10 <sup>-2</sup> | ↓↓STC2, ↑↑TFPI                                                       |
| Cancer                                                                                                                                          | clear-cell adenocarcinoma | clear-cell adenocarcinoma        | 5 | 2.03×10 <sup>-2</sup> | ↑↑ACSL3, ↑↑GPM6A, ↓↓HMCN1, ↑↑MLLT3, ↑↑REV3L                          |
| Organismal Injury and Abnormalities                                                                                                             | bleeding                  | bleeding of tissue               | 2 | 2.06×10 <sup>-2</sup> | ↑↑TFPI, ↑↑VWF                                                        |
| Cellular Assembly and Organization   Cellular Function and Maintenance                                                                          | quantity                  | quantity of cellular protrusions | 3 | 2.06×10 <sup>-2</sup> | ↑↑EZR, ↑↑GPM6A, ↓↓GPX4                                               |
| Embryonic Development   Organ Development   Organismal Development   Skeletal and Muscular System Development and Function   Tissue Development | development               | development of striated muscle   | 3 | 2.09×10 <sup>-2</sup> | ↓↓F2RL1, ↓↓SVIL, ↑↑TGFB3                                             |
| Cell Morphology                                                                                                                                 | cell polarity formation   | cell polarity formation          | 2 | 2.13×10 <sup>-2</sup> | ↑↑EZR, ↑↑PRICKLE2                                                    |
| Embryonic Development   Organ Development   Organismal Development   Skeletal and Muscular System Development and Function   Tissue Development | development               | development of muscle            | 5 | 2.15×10 <sup>-2</sup> | ↑↑ARID5B, ↓↓F2RL1, ↑↑HOPX, ↓↓SVIL, ↑↑TGFB3                           |
| Lipid Metabolism   Small Molecule Biochemistry                                                                                                  | conversion                | conversion of lipid              | 3 | 2.16×10 <sup>-2</sup> | ↑↑AKR1C1/AKR1C2, ↓↓GPX4, ↓↓PTGER3                                    |
| Cardiovascular Disease   Hematological Disease                                                                                                  | thrombosis                | Thrombosis                       | 3 | 2.20×10 <sup>-2</sup> | ↓↓PTGER3, ↑↑TFPI, ↑↑VWF                                              |

|                                                                                                                                                                   |                              |                                              |    |                                                                                                                                                                                                                        |
|-------------------------------------------------------------------------------------------------------------------------------------------------------------------|------------------------------|----------------------------------------------|----|------------------------------------------------------------------------------------------------------------------------------------------------------------------------------------------------------------------------|
| Cell-To-Cell Signaling and Interaction   Hematological System Development and Function   Immune Cell Trafficking   Inflammatory Response                          | activation                   | activation of myeloid cells                  | 4  | 2.29×10 <sup>-2</sup> ↓↓F2RL1, ↓↓MYCN, ↓↓PTGER3, ↑↑RORA                                                                                                                                                                |
| Cellular Growth and Proliferation                                                                                                                                 | formation                    | formation of cells                           | 5  | 2.32×10 <sup>-2</sup> ↑↑HOPX, ↓↓MYCN, ↑↑PRICKLE1, ↑↑PRICKLE2, ↑↑VWF                                                                                                                                                    |
| Neurological Disease                                                                                                                                              | progressive motor neuropathy | progressive motor neuropathy                 | 6  | 2.40×10 <sup>-2</sup> ↑↑ALCAM, ↑↑DNAJC1, ↑↑EZR, ↓↓F2RL1, ↑↑MDH1, ↑↑RBFOX1                                                                                                                                              |
| Cancer   Gastrointestinal Disease                                                                                                                                 | colon cancer                 | colon cancer                                 | 21 | 2.62×10 <sup>-2</sup> ↑↑ACSL3, ↑↑AKR1C1/AKR1C2, ↑↑ALCAM, ↑↑ANKRD28, ↑↑ANXA4, ↑↑COL14A1, ↓↓F2RL1, ↑↑H2AFY, ↓↓HMCN1, ↑↑MAP9, ↑MARK1, ↑↑MDH1, ↑↑MID1, ↑↑MLLT3, ↓↓MYCN, ↑↑PTPRM, ↓↓SLC26A2, ↓↓SVIL, ↑↑SYNE1, ↑↑TJP1, ↑↑VWF |
| Cancer   Hematological Disease                                                                                                                                    | leukemia                     | leukemia                                     | 7  | 2.76×10 <sup>-2</sup> ↑↑ARID5B, ↑↑CRIPT, ↓↓LYZ, ↓↓MYCN, ↑↑PRICKLE2, ↑↑TFPI, ↑↑TJP1                                                                                                                                     |
| Organismal Injury and Abnormalities                                                                                                                               | thrombus                     | thrombus                                     | 2  | 2.82×10 <sup>-2</sup> ↑↑TFPI, ↑↑VWF                                                                                                                                                                                    |
| Inflammatory Response                                                                                                                                             | inflammation                 | inflammation of respiratory system component | 5  | 3.02×10 <sup>-2</sup> ↓↓F2RL1, ↓↓PTGER3, ↑↑RORA, ↑↑TFPI, ↑↑ZNF614                                                                                                                                                      |
| Hematological System Development and Function   Organismal Functions                                                                                              | coagulation                  | coagulation of blood                         | 3  | 3.13×10 <sup>-2</sup> ↓↓F2RL1, ↑↑TFPI, ↑↑VWF                                                                                                                                                                           |
| Digestive System Development and Function                                                                                                                         | development                  | development of palate                        | 2  | 3.20×10 <sup>-2</sup> ↑↑ARID5B, ↑↑TGFB3                                                                                                                                                                                |
| Cardiovascular System Development and Function   Cellular Development   Cellular Growth and Proliferation   Skeletal and Muscular System Development and Function | proliferation                | proliferation of cardiomyocytes              | 2  | 3.20×10 <sup>-2</sup> ↓↓MYCN, ↑↑TGFB3                                                                                                                                                                                  |
| Cardiovascular Disease                                                                                                                                            | valvulopathy                 | valvulopathy                                 | 2  | 3.20×10 <sup>-2</sup> ↑↑SLC20A1, ↑↑VWF                                                                                                                                                                                 |

|                                                                                                         |                             |                                        |    |                       |                                                                                                                                                                                     |
|---------------------------------------------------------------------------------------------------------|-----------------------------|----------------------------------------|----|-----------------------|-------------------------------------------------------------------------------------------------------------------------------------------------------------------------------------|
| Cellular Development   Cellular Growth and Proliferation   Connective Tissue Development and Function   | proliferation               | proliferation of fibroblast cell lines | 5  | $3.39 \times 10^{-2}$ | ↑↑ARID5B, ↓↓F2RL1, ↑↑INPP4A, ↓↓MYCN, ↑↑TFG                                                                                                                                          |
| Cardiovascular Disease   Neurological Disease                                                           | ischemia                    | ischemia of brain                      | 2  | $3.52 \times 10^{-2}$ | ↓↓PYGL, ↑↑VWF                                                                                                                                                                       |
| Cell Signaling                                                                                          | protein kinase cascade      | protein kinase cascade                 | 5  | $3.67 \times 10^{-2}$ | ↓↓F2RL1, ↑MARK1, ↑↑SLC20A1, ↑↑TFG, ↑↑TGFB3                                                                                                                                          |
| Cancer   Organismal Injury and Abnormalities   Reproductive System Disease                              | female genital tract cancer | female genital tract cancer            | 8  | $3.76 \times 10^{-2}$ | ↑↑ALCAM, ↑↑COL14A1, ↓↓F2RL1, ↑↑GPM6A, ↑↑H2AFY, ↓↓PTGER3, ↑↑TFPI, ↑↑TGFB3                                                                                                            |
| Developmental Disorder                                                                                  | dysgenesis                  | dysgenesis                             | 2  | $3.84 \times 10^{-2}$ | ↑↑AKR1C1/AKR1C2, ↓↓MAFB                                                                                                                                                             |
| Dermatological Diseases and Conditions   Gastrointestinal Disease   Organismal Injury and Abnormalities | ulcer                       | ulcer                                  | 2  | $3.84 \times 10^{-2}$ | ↑↑COL14A1, ↑↑TFPI                                                                                                                                                                   |
| Cancer   Gastrointestinal Disease                                                                       | gastrointestinal carcinoma  | gastrointestinal carcinoma             | 20 | $3.97 \times 10^{-2}$ | ↑↑ACSL3, ↑↑AKR1C1/AKR1C2, ↑↑ALCAM, ↑↑ANKRD28, ↑↑ANXA4, ↑↑COL14A1, ↑↑EZR, ↓↓F2RL1, ↓↓HMCN1, ↑↑MAP9, ↑MARK1, ↑↑MDH1, ↑↑MID1, ↑↑MLLT3, ↓↓MYCN, ↑↑PTPRM, ↓↓SVIL, ↑↑SYNE1, ↑↑TJP1, ↑↑VWF |
| Cellular Movement                                                                                       | cell rolling                | cell rolling                           | 2  | $4.18 \times 10^{-2}$ | ↓↓F2RL1, ↑↑VWF                                                                                                                                                                      |
| Organismal Development                                                                                  | morphology                  | morphology of head                     | 8  | $4.29 \times 10^{-2}$ | ↓↓GPX4, ↑↑MID1, ↑↑MT3, ↓↓MYCN, ↑↑PGAP1, ↑↑RORA, ↓↓SHISA2, ↑↑TFPI                                                                                                                    |
| Cancer   Gastrointestinal Disease                                                                       | colon carcinoma             | colon carcinoma                        | 19 | $4.34 \times 10^{-2}$ | ↑↑ACSL3, ↑↑AKR1C1/AKR1C2, ↑↑ALCAM, ↑↑ANKRD28, ↑↑ANXA4, ↑↑COL14A1, ↓↓F2RL1, ↓↓HMCN1, ↑↑MAP9, ↑MARK1, ↑↑MDH1, ↑↑MID1, ↑↑MLLT3, ↓↓MYCN, ↑↑PTPRM, ↓↓SVIL, ↑↑SYNE1, ↑↑TJP1, ↑↑VWF        |

|                                                                                                                                                                                              |                         |                                     |   |                                                         |
|----------------------------------------------------------------------------------------------------------------------------------------------------------------------------------------------|-------------------------|-------------------------------------|---|---------------------------------------------------------|
| Cell-To-Cell Signaling and Interaction   Hematological System Development and Function   Nervous System Development and Function                                                             | activation              | activation of microglia             | 2 | 4.44×10 <sup>-2</sup> ↓↓F2RL1, ↓↓PTGER3                 |
| Connective Tissue Development and Function   Embryonic Development   Organ Development   Organismal Development   Skeletal and Muscular System Development and Function   Tissue Development | morphogenesis           | morphogenesis of skeletal system    | 2 | 4.44×10 <sup>-2</sup> ↑↑ARID5B, ↓↓MYCN                  |
| Cancer   Neurological Disease                                                                                                                                                                | brain tumor             | brain tumor                         | 4 | 4.45×10 <sup>-2</sup> ↑↑ALCAM, ↓↓KCNAB1, ↓↓MYCN, ↑↑TFPI |
| Cardiovascular Disease                                                                                                                                                                       | acute coronary syndrome | acute coronary syndrome             | 3 | 4.50×10 <sup>-2</sup> ↓↓F2RL1, ↑↑TFPI, ↑↑VWF            |
| Embryonic Development   Organ Development   Organismal Development   Skeletal and Muscular System Development and Function   Tissue Development                                              | development             | development of skeletal muscle      | 2 | 4.53×10 <sup>-2</sup> ↓↓F2RL1, ↓↓SVIL                   |
| Molecular Transport                                                                                                                                                                          | transport               | transport of inorganic anion        | 2 | 4.71×10 <sup>-2</sup> ↑↑SLC20A1, ↓↓SLC26A2              |
| Nervous System Development and Function   Organ Morphology   Organismal Development                                                                                                          | abnormal morphology     | abnormal morphology of diencephalon | 2 | 4.80×10 <sup>-2</sup> ↑↑MT3, ↓↓SHISA2                   |
| Organ Development                                                                                                                                                                            | function                | function of muscle                  | 2 | 4.80×10 <sup>-2</sup> ↑↑COL14A1, ↑↑SYNE1                |

---

Symbols for genes with increased (or decreased) expression and fold-change≥2 are preceded with ↑↑ (or ↓↓). Symbols for genes with increased (or decreased) expression and fold-change<2 are preceded with ↑ (or ↓).

---
