# Supplementary material
Source: PubMed Central journal article supplement (PMC4385968)
Supplement: tableS4.pdf [file tableS4.pdf]

**Table S4. IPA Networks identified for genes affected in summer granulosa cells**

| ID | Molecules in Network                                                                                                                                                                                                                                                                                                                                                               | Score | Focus     |                                                                                            | Upstream regulators                                                                                                                                                                                                          |
|----|------------------------------------------------------------------------------------------------------------------------------------------------------------------------------------------------------------------------------------------------------------------------------------------------------------------------------------------------------------------------------------|-------|-----------|--------------------------------------------------------------------------------------------|------------------------------------------------------------------------------------------------------------------------------------------------------------------------------------------------------------------------------|
|    |                                                                                                                                                                                                                                                                                                                                                                                    |       | Molecules | Top Functions                                                                              |                                                                                                                                                                                                                              |
| N1 | <p> ↓↓AKR1B10,<br/> ↑↑AKR1C1/AKR1C2, ↓ALAS1,<br/> ↑↑ALCAM, ↑↑ANXA4, Ap1, CD3,<br/> Cg, ERK1/2, ↑↑EZR, F Actin,<br/> ↓↓F2RL1, FSH, ↓↓GPX4,<br/> ↑↑H2AFY, ↓↓HMCN1, ↑↑HOPX,<br/> ↓↓MAFB, ↑↑MID1, ↑↑MT3, NFkB<br/> (complex), PI3K (family), Pkc(s),<br/> ↓↓PYGL, Ras homolog, ↑↑RORA,<br/> ↓↓SHISA2, ↑↑SLC20A1, ↓↓STC2,<br/> ↑↑TFG, ↑↑TFPI, Tgf beta,<br/> ↑↑TGFR3, ↑↑TJP1, Vegf </p> | 49    | 23        | Cellular Growth and Proliferation, Cancer, Gastrointestinal Disease                        | <p> Vegf(M/5), Cg(M/5),<br/> PI3K (family)(M/3),<br/> ↓↓MAFB(M/2),<br/> hydrogen peroxide(5),<br/> TP53(4), TGFB1(7),<br/> EGF(4), OSM(4),<br/> FGF2(4), IL15(4),<br/> prostaglandin E2(4),<br/> dihydrotestosterone(4) </p> |
| N2 | <p> ABCF2, ↑↑ACSL3, AGPAT2,<br/> ↑↑ALDH9A1, ANKRD26,<br/> ↑↑ANKRD28, ANKRD52,<br/> ↓C11orf58, CCND1,<br/> CTTNBP2NL, ↑DR1, ↓↓GALNT7,<br/> KIF14, ↓↓LYZ, ↑MARK1, ↑↑MDH1,<br/> ↓↓MT-ND2, MYO1G, NDUFS8,<br/> ODF2, PCNXL3, PPP6R1,<br/> ↑↑RBFox1, RBM24, ↑↑RBMS3,<br/> STK33, ↓↓SVIL, TGS1,<br/> ↓↓TMEM219, ↓↓TMEM106B,<br/> UACA, UBC, ↑↑USP15, USP9Y,<br/> ↑↑VWF </p>              | 34    | 17        | Developmental Disorder, Hereditary Disorder, Metabolic Disease                             | <p> CCND1(M/3), TP53(2),<br/> TGFB1(3), SYVN1(2),<br/> ERG(2), PPARG(2) </p>                                                                                                                                                 |
| N3 | <p> ↑↑ARID5B, ↓↓C8orf47, CEP120,<br/> CEP350, ↑↑COL14A1,<br/> ↑↑FAM13A, FANCB, GABRB2,<br/> ↑↑GPM6A, IGF2BP1, LETM1,<br/> ↓↓MRPL36, ↓↓MT-ATP8, ↓↓NAV1,<br/> ↑↑NPTN, NUP210, OPRD1,<br/> PACSIN1, PAM16, ↑↑PGAP1,<br/> POLD2, POLD3, POLG, POLH,<br/> ↑↑PRICKLE1, RAB34, RAPGEF2,<br/> REV1, ↑↑REV3L, ↓↓SLC26A2,<br/> ↓↓SPICE1, TCF7L1, ↑TMEM87A,<br/> UBC, ↓↓VAT1L </p>            | 31    | 16        | Cell Cycle, DNA Replication, Recombination, and Repair, Cellular Assembly and Organization | <p> TCF7L1(M/1),<br/> TGFB1(2), RAF1(2) </p>                                                                                                                                                                                 |

|    |                                                                                                                                                                                                                                                                                                                                                                                                     |    |    |                                                                                               |                                                                                                                      |
|----|-----------------------------------------------------------------------------------------------------------------------------------------------------------------------------------------------------------------------------------------------------------------------------------------------------------------------------------------------------------------------------------------------------|----|----|-----------------------------------------------------------------------------------------------|----------------------------------------------------------------------------------------------------------------------|
| N4 | ABHD16A, ↑↑AUTS2, CCR6, CH25H, CLIC5, ↑↑CRIPT, ↑↑DNAJC1, DUSP7, GNA14, GNAQ, GRPR, HNF4A, IFNG, IL2, IL12 (family), IL23R, ↑↑KCTD12, ↑↑MLLT3, MLLT10, ↓↓MT-ND2, ↓↓MT-ND4L, NAA10, NDUFS4, ↑↑NEAT1, PPP6C, ↓↓PTGER3, PTPRE, ↑↑PTPRM, SRC, STAT1, TBC1D10A, Tcrd, TRIP11, Villin, ↑↑ZNF614                                                                                                            | 19 | 11 | Hematological System Development and Function, Immune Cell Trafficking, Inflammatory Response |                                                                                                                      |
| N5 | Akt, ↑↑ANGPTL1, APP, Calmodulin, CCSER2, Ck2, COL4A6, ↑CORO6, DIXDC1, DUSP7, ↑↑EID3, ELAVL4, ERK, ESR1, ICAM3, ↑↑INPP4A, ↓↓KCNAB1, MAGEH1, ↑↑MAP9, miR-101-3p (and other miRNAs w/seed ACAGUAC), ↓↓MYCN, phosphatidylinositol 3, 4-diphosphate, phosphatidylinositol-3, 4-bisphosphate 4-phosphatase, PPP6R2, ↑↑PRICKLE2, RGS5, RPL41, SH3BP5, SLC38A2, SUN1, ↓↓SUSD3, ↑↑SYNE1, WAC, ↑WDFY1, ZFAND5 | 18 | 11 | Cellular Development, Cell Cycle, Nervous System Development and Function                     | miR-101-3p (and other miRNAs w/seed ACAGUAC)(M/1), Calmodulin(M/2), ELAVL4(M/1), HOXA10(2), GLI1(2), progesterone(2) |

---

The numbers in parenthesis next to regulators' gene IDs in the last column signify how many molecules in those networks the regulators are affecting (e.g. Vegf regulates five molecules in Network 1). Letter (M/...) signifies that the regulators are also member of those networks, e.g. Vegf is also a member of network 1. Symbols for regulators with increased (or decreased) expression and fold-change $\geq$ 2 are preceded with ↑↑ (or ↓↓). Symbols for genes with increased (or decreased) expression and fold-change $<$ 2 are preceded with ↑ (or ↓).

---
