# Supplementary material
Source: PubMed Central journal article supplement (PMC4385968)
Supplement: tableS5.pdf [file tableS5.pdf]

Table S5. Upstream regulators and their potential targets in summer granulosa cells

| Upstream Regulator                                                                                                                                                   | Molecule Type                   | Predicted                     |                    | p-value of overlap    | Target molecules in dataset                                                                                              |
|----------------------------------------------------------------------------------------------------------------------------------------------------------------------|---------------------------------|-------------------------------|--------------------|-----------------------|--------------------------------------------------------------------------------------------------------------------------|
|                                                                                                                                                                      |                                 | Activation / Inhibition State | Activation z-score |                       |                                                                                                                          |
| <b>Upstream regulators showing significantly different expression in summer granulosa cells</b>                                                                      |                                 |                               |                    |                       |                                                                                                                          |
| ↓↓MAFB                                                                                                                                                               | other                           |                               |                    | 6.70×10 <sup>-3</sup> | ↓↓AKR1B10, ↓↓MAFB                                                                                                        |
| <b>Upstream regulators (not showing significantly different expression in summer granulosa cells) with predicted activation/inhibition state ( z &gt;1.96)</b>       |                                 |                               |                    |                       |                                                                                                                          |
| OSM                                                                                                                                                                  | cytokine                        | Inhibited                     | -2.236             | 3.59×10 <sup>-2</sup> | ↓↓AKR1B10, ↑↑AKR1C1/AKR1C2, ↓↓PYGL, ↑↑RORA, ↑↑SYNE1                                                                      |
| <b>Upstream regulators (not showing significantly different expression in summer granulosa cells) with uncharacterized activation/inhibition state ( z &lt;1.96)</b> |                                 |                               |                    |                       |                                                                                                                          |
| Vegf                                                                                                                                                                 | group                           |                               | 1.408              | 5.48×10 <sup>-4</sup> | ↑↑HOPX, ↑↑MID1, ↓↓MYCN, ↓↓SHISA2, ↑↑SLC20A1, ↑↑TJP1, ↑↑VWF                                                               |
| hydrogen peroxide                                                                                                                                                    | chemical - endogenous mammalian |                               | 1.387              | 1.71×10 <sup>-2</sup> | ↑↑AKR1C1/AKR1C2, ↑↑EZR, ↓↓F2RL1, ↑↑SLC20A1, ↑↑TGFB3                                                                      |
| PDLIM2                                                                                                                                                               | other                           |                               | 1.342              | 1.71×10 <sup>-5</sup> | ↓↓F2RL1, ↑↑KCTD12, ↓↓NAV1, ↓↓STC2, ↓↓SUSD3                                                                               |
| TP53                                                                                                                                                                 | transcription regulator         |                               | 1.276              | 3.64×10 <sup>-2</sup> | ↑↑ACSL3, ↑↑ALDH9A1, ↑↑ANXA4, ↑↑COL14A1, ↑↑EZR, ↑↑H2AFY, ↑↑INPP4A, ↑↑PTPRM, ↑↑TJP1                                        |
| TGFB1                                                                                                                                                                | growth factor                   |                               | 1.086              | 3.60×10 <sup>-3</sup> | ↑↑ACSL3, ↑↑AKR1C1/AKR1C2, ↑↑ARID5B, ↓↓F2RL1, ↑↑MID1, ↓↓MYCN, ↑↑RBMS3, ↑↑RORA, ↑↑SLC20A1, ↓↓STC2, ↑↑TGFB3, ↓↓VAT1L, ↑↑VWF |
| CEBPA                                                                                                                                                                | transcription regulator         |                               | 1.000              | 4.08×10 <sup>-2</sup> | ↓↓AKR1B10, ↑↑AKR1C1/AKR1C2, ↓↓MYCN, ↑↑RORA                                                                               |
| IGF1                                                                                                                                                                 | growth factor                   |                               | 0.789              | 4.90×10 <sup>-2</sup> | ↑↑AKR1C1/AKR1C2, ↓↓MYCN, ↑↑SLC20A1, ↑↑TJP1                                                                               |
| HOXA10                                                                                                                                                               | transcription regulator         |                               | 0.762              | 4.30×10 <sup>-4</sup> | ↓↓KCNA1, ↓↓LYZ, ↓↓MYCN, ↓↓PTGER3, ↑↑TGFB3                                                                                |
| EGF                                                                                                                                                                  | growth factor                   |                               | 0.555              | 2.35×10 <sup>-2</sup> | ↑↑ALCAM, ↑↑EZR, ↑↑MT3, ↓↓MYCN, ↑↑TJP1                                                                                    |
| F2                                                                                                                                                                   | peptidase                       |                               | 0.343              | 1.21×10 <sup>-2</sup> | ↓↓F2RL1, ↑↑TFPI, ↑↑TJP1, ↑↑VWF                                                                                           |
| Cg                                                                                                                                                                   | complex                         |                               | -0.152             | 7.05×10 <sup>-3</sup> | ↓↓AKR1B10, ↓↓F2RL1, ↑↑RORA, ↑↑SLC20A1, ↑↑TGFB3                                                                           |
| STAT4                                                                                                                                                                | transcription regulator         |                               | -0.132             | 6.93×10 <sup>-3</sup> | ↑↑MLLT3, ↓↓PYGL, ↑↑RORA, ↓↓STC2                                                                                          |
| HOXD10                                                                                                                                                               | transcription regulator         |                               | 0.000              | 6.68×10 <sup>-5</sup> | ↑↑EZR, ↑↑TFPI, ↑↑TJP1, ↑↑USP15                                                                                           |
| FOXP2                                                                                                                                                                | transcription regulator         |                               |                    | 1.20×10 <sup>-4</sup> | ↑↑HOPX, ↓↓MYCN                                                                                                           |
| LONP1                                                                                                                                                                | peptidase                       |                               |                    | 5.36×10 <sup>-4</sup> | ↓↓MT-ATP8, ↓↓MT-ND4L                                                                                                     |
| PI3K (family)                                                                                                                                                        | group                           |                               |                    | 6.80×10 <sup>-4</sup> | ↓↓AKR1B10, ↑↑AKR1C1/AKR1C2, ↑↑TJP1                                                                                       |
| CAV1                                                                                                                                                                 | transmembrane receptor          |                               |                    | 6.97×10 <sup>-4</sup> | ↑↑SLC20A1, ↑↑TFPI, ↑↑TJP1, ↑↑TMEM87A                                                                                     |
| FOXP1                                                                                                                                                                | transcription regulator         |                               |                    | 2.44×10 <sup>-3</sup> | ↑↑HOPX, ↓↓MYCN                                                                                                           |
| SBDS                                                                                                                                                                 | other                           |                               |                    | 3.33×10 <sup>-3</sup> | ↑↑AKR1C1/AKR1C2, ↑↑COL14A1, ↓↓MAFB                                                                                       |

|                                  |                                      |                       |                                              |
|----------------------------------|--------------------------------------|-----------------------|----------------------------------------------|
| ADTRP                            | other                                | $3.51 \times 10^{-3}$ | ↑↑TFPI                                       |
| CLDN9                            | other                                | $3.51 \times 10^{-3}$ | ↑↑TJP1                                       |
| SYMPK                            | other                                | $3.51 \times 10^{-3}$ | ↑↑TJP1                                       |
| MYT1L                            | transcription regulator              | $3.51 \times 10^{-3}$ | ↑↑RBFOX1                                     |
| LRRN1                            | other                                | $3.51 \times 10^{-3}$ | ↓↓MYCN                                       |
| B4GALNT2                         | enzyme                               | $3.51 \times 10^{-3}$ | ↑↑VWF                                        |
| WASF1                            | other                                | $3.51 \times 10^{-3}$ | ↑↑EZR                                        |
| TGFB3                            | growth factor                        | $4.16 \times 10^{-3}$ | ↓↓F2RL1, ↑↑TGFB3, ↑↑TJP1                     |
| FGF2                             | growth factor                        | $6.88 \times 10^{-3}$ | ↓↓AKR1B10, ↑↑SLC20A1, ↑↑TFPI, ↑↑TGFB3, ↑↑VWF |
| NTN4                             | other                                | $7.00 \times 10^{-3}$ | ↑↑TJP1                                       |
| VANGL2                           | other                                | $7.00 \times 10^{-3}$ | ↑↑PRICKLE2                                   |
| IL15                             | cytokine                             | $7.84 \times 10^{-3}$ | ↑↑H2AFY, ↓↓HMCN1, ↑↑MLLT3, ↓↓PYGL, ↑↑TJP1    |
| mir-34                           | microRNA                             | $7.86 \times 10^{-3}$ | ↑↑MLLT3, ↓↓MYCN                              |
| NKX2-5                           | transcription regulator              | $7.86 \times 10^{-3}$ | ↑↑HOPX, ↓↓MYCN                               |
| ETV5                             | transcription regulator              | $9.54 \times 10^{-3}$ | ↑↑ALCAM, ↑↑TJP1                              |
| GDP                              | chemical - endogenous<br>mammalian   | $1.05 \times 10^{-2}$ | ↑↑TGFB3                                      |
| Vacuolar H+ ATPase<br>gelatinase | complex<br>group                     | $1.05 \times 10^{-2}$ | ↓↓TMEM106B                                   |
| MZB1                             | other                                | $1.05 \times 10^{-2}$ | ↑↑TJP1                                       |
| NPHS1                            | other                                | $1.05 \times 10^{-2}$ | ↑↑TJP1                                       |
| Ptger2                           | G-protein coupled receptor           | $1.05 \times 10^{-2}$ | ↓↓PTGER3                                     |
| GIPC1                            | other                                | $1.05 \times 10^{-2}$ | ↑↑TGFB3                                      |
| KIRREL                           | other                                | $1.05 \times 10^{-2}$ | ↑↑TJP1                                       |
| NPHS2                            | other                                | $1.05 \times 10^{-2}$ | ↑↑TJP1                                       |
| VEZF1                            | transcription regulator              | $1.05 \times 10^{-2}$ | ↑↑USP15                                      |
| MXD3                             | transcription regulator              | $1.05 \times 10^{-2}$ | ↓↓MYCN                                       |
| hydrocortisone                   | chemical - endogenous<br>mammalian   | $1.06 \times 10^{-2}$ | ↑↑EZR, ↑↑MT3, ↓↓STC2                         |
| IL11                             | cytokine                             | $1.14 \times 10^{-2}$ | ↑↑EZR, ↑↑VWF                                 |
| IGFBP2                           | other                                | $1.14 \times 10^{-2}$ | ↑↑COL14A1, ↑↑RBMS3                           |
| RXRA                             | ligand-dependent nuclear<br>receptor | $1.14 \times 10^{-2}$ | ↑↑ACSL3, ↑↑AKR1C1/AKR1C2, ↓↓MYCN, ↑↑RORA     |
| SYVN1                            | transporter                          | $1.15 \times 10^{-2}$ | ↑↑ACSL3, ↑↑SLC20A1, ↓↓TMEM106B               |
| WT1                              | transcription regulator              | $1.29 \times 10^{-2}$ | ↑↑EZR, ↓↓MYCN, ↑↑SLC20A1                     |
| PML                              | transcription regulator              | $1.33 \times 10^{-2}$ | ↑↑ANXA4, ↓↓LYZ                               |

|                                              |                                 |                                                        |
|----------------------------------------------|---------------------------------|--------------------------------------------------------|
| ZFYVE9                                       | peptidase                       | 1.39x10 <sup>-2</sup> ↑↑TJP1                           |
| LRP8                                         | transmembrane receptor          | 1.39x10 <sup>-2</sup> ↓↓GPX4                           |
| TBX20                                        | transcription regulator         | 1.39x10 <sup>-2</sup> ↓↓MYCN                           |
| GRPR                                         | G-protein coupled receptor      | 1.39x10 <sup>-2</sup> ↓↓MYCN                           |
| miR-101-3p (and other miRNAs w/seed ACAGUAC) | mature microRNA                 | 1.39x10 <sup>-2</sup> ↓↓MYCN                           |
| QKI                                          | other                           | 1.39x10 <sup>-2</sup> ↑↑H2AFY                          |
| F2R                                          | G-protein coupled receptor      | 1.49x10 <sup>-2</sup> ↑↑TJP1, ↑↑VWF                    |
| Calmodulin                                   | group                           | 1.71x10 <sup>-2</sup> ↑CORO6, ↑↑MAP9                   |
| GTP                                          | chemical - endogenous mammalian | 1.74x10 <sup>-2</sup> ↑↑TGFB3                          |
| chondroitin sulfate E                        | chemical - endogenous mammalian | 1.74x10 <sup>-2</sup> ↑↑PRICKLE1                       |
| ELAVL4                                       | other                           | 1.74x10 <sup>-2</sup> ↓↓MYCN                           |
| FZD5                                         | G-protein coupled receptor      | 1.74x10 <sup>-2</sup> ↑↑TJP1                           |
| NAA10                                        | enzyme                          | 1.74x10 <sup>-2</sup> ↑↑TGFB3                          |
| PLAA                                         | other                           | 1.74x10 <sup>-2</sup> ↑↑ANXA4                          |
| ACTN4                                        | other                           | 1.74x10 <sup>-2</sup> ↓↓MYCN                           |
| succinylacetone                              | chemical - endogenous mammalian | 1.74x10 <sup>-2</sup> ↓ALAS1                           |
| prostaglandin E2                             | chemical - endogenous mammalian | 1.84x10 <sup>-2</sup> ↓↓F2RL1, ↓↓MAFB, ↑↑TGFB3, ↑↑TJP1 |
| BSCL2                                        | other                           | 1.88x10 <sup>-2</sup> ↑MARK1, ↓↓PYGL                   |
| PRKAG3                                       | kinase                          | 2.03x10 <sup>-2</sup> ↓ALAS1, ↑↑REV3L, ↓↓SHISA2        |
| PROCR                                        | other                           | 2.09x10 <sup>-2</sup> ↑↑TJP1                           |
| LIMS2                                        | other                           | 2.09x10 <sup>-2</sup> ↑↑TJP1                           |
| TNFRSF14                                     | transmembrane receptor          | 2.09x10 <sup>-2</sup> ↓↓F2RL1                          |
| ERG                                          | transcription regulator         | 2.13x10 <sup>-2</sup> ↓↓MYCN, ↓↓SVIL, ↑↑VWF            |
| PKD1                                         | ion channel                     | 2.23x10 <sup>-2</sup> ↑↑MID1, ↑↑SYNE1, ↑↑VWF           |
| PDX1                                         | transcription regulator         | 2.30x10 <sup>-2</sup> ↑↑MDH1, ↓↓PTGER3, ↑↑TGFB3        |
| CDX2                                         | transcription regulator         | 2.32x10 <sup>-2</sup> ↑↑MLLT3, ↓↓MYCN                  |
| MYOD1                                        | transcription regulator         | 2.40x10 <sup>-2</sup> ↓↓MAFB, ↑↑TGFB3, ↑↑TJP1          |
| tryptase                                     | group                           | 2.43x10 <sup>-2</sup> ↓↓F2RL1                          |
| MRPL12                                       | other                           | 2.43x10 <sup>-2</sup> ↓↓MT-ND2                         |

|                                               |                                 |                                                                   |
|-----------------------------------------------|---------------------------------|-------------------------------------------------------------------|
| NPAS2                                         | transcription regulator         | $2.43 \times 10^{-2}$ ↓ALAS1                                      |
| GLI1                                          | transcription regulator         | $2.44 \times 10^{-2}$ ↑↑EZR, ↓↓MYCN, ↑↑SYNE1                      |
| MIF                                           | cytokine                        | $2.45 \times 10^{-2}$ ↓↓F2RL1, ↓↓MYCN                             |
| CCL5                                          | cytokine                        | $2.65 \times 10^{-2}$ ↑↑ALCAM, ↓↓F2RL1                            |
| TCF7L1                                        | transcription regulator         | $2.77 \times 10^{-2}$ ↓↓SLC26A2                                   |
| TIP60                                         | complex                         | $2.77 \times 10^{-2}$ ↓↓MYCN                                      |
| LIMS1                                         | other                           | $2.77 \times 10^{-2}$ ↑↑TJP1                                      |
| miR-203-3p (and other miRNAs w/seed UGAAAUG)  | mature microRNA                 | $2.77 \times 10^{-2}$ ↓↓F2RL1                                     |
| POU3F3                                        | transcription regulator         | $2.77 \times 10^{-2}$ ↓↓PTGER3                                    |
| HBP1                                          | transcription regulator         | $2.77 \times 10^{-2}$ ↓↓MYCN                                      |
| SDC2                                          | other                           | $2.77 \times 10^{-2}$ ↑↑TGFB3                                     |
| pepstatin                                     | chemical - protease inhibitor   | $2.77 \times 10^{-2}$ ↓↓STC2                                      |
| EDN1                                          | cytokine                        | $2.81 \times 10^{-2}$ ↑↑ANXA4, ↑↑EZR, ↑↑VWF                       |
| dinoprost                                     | chemical - endogenous mammalian | $2.85 \times 10^{-2}$ ↑↑AKR1C1/AKR1C2, ↑↑ANXA4                    |
| TRAF2                                         | enzyme                          | $2.85 \times 10^{-2}$ ↑↑ANXA4, ↓↓PYGL                             |
| PAX3                                          | transcription regulator         | $3.08 \times 10^{-2}$ ↓↓F2RL1, ↓↓GPX4, ↓↓PTGER3                   |
| LIN28B                                        | other                           | $3.11 \times 10^{-2}$ ↓↓MYCN                                      |
| MEMO1                                         | other                           | $3.11 \times 10^{-2}$ ↓↓STC2                                      |
| mir-214                                       | microRNA                        | $3.11 \times 10^{-2}$ ↑↑ALCAM                                     |
| ERP29                                         | transporter                     | $3.11 \times 10^{-2}$ ↑↑TJP1                                      |
| TRAF3                                         | enzyme                          | $3.14 \times 10^{-2}$ ↑↑ANXA4, ↓↓PYGL                             |
| progesterone                                  | chemical - endogenous mammalian | $3.25 \times 10^{-2}$ ↑↑HOPX, ↓↓KCNAB1, ↓↓MYCN, ↓↓PTGER3, ↑↑TGFB3 |
| mir-210                                       | microRNA                        | $3.44 \times 10^{-2}$ ↑↑H2AFY, ↓↓MRPL36                           |
| mir-130                                       | microRNA                        | $3.45 \times 10^{-2}$ ↓↓MAFB                                      |
| miR-130a-3p (and other miRNAs w/seed AGUGCAA) | mature microRNA                 | $3.45 \times 10^{-2}$ ↓↓MAFB                                      |
| NMNAT1                                        | enzyme                          | $3.45 \times 10^{-2}$ ↑↑TFPI                                      |
| ALK                                           | kinase                          | $3.45 \times 10^{-2}$ ↓↓MYCN                                      |
| FLT1                                          | kinase                          | $3.45 \times 10^{-2}$ ↑↑VWF                                       |
| ACKR3                                         | G-protein coupled receptor      | $3.45 \times 10^{-2}$ ↑↑VWF                                       |

|                                                    |                                      |                       |                                         |
|----------------------------------------------------|--------------------------------------|-----------------------|-----------------------------------------|
| GBX2                                               | transcription regulator              | $3.45 \times 10^{-2}$ | ↓↓MAFB                                  |
| dihydrotestosterone                                | chemical - endogenous<br>mammalian   | $3.47 \times 10^{-2}$ | ↓ALAS1, ↓↓GPX4, ↑MARK1, ↑↑TFPI, ↑↑TGFB3 |
| FBXO32                                             | enzyme                               | $3.51 \times 10^{-2}$ | ↓↓MYCN, ↓↓PTGER3                        |
| IGF1R                                              | transmembrane receptor               | $3.63 \times 10^{-2}$ | ↓↓MYCN, ↑↑TJP1, ↑TMEM87A                |
| RAF1                                               | kinase                               | $3.67 \times 10^{-2}$ | ↑↑FAM13A, ↑↑MT3, ↓↓SLC26A2              |
| HNRNPAB                                            | enzyme                               | $3.79 \times 10^{-2}$ | ↑↑TJP1                                  |
| BMP6                                               | growth factor                        | $3.83 \times 10^{-2}$ | ↓↓MYCN, ↑↑SLC20A1                       |
| TGFB2                                              | growth factor                        | $3.83 \times 10^{-2}$ | ↑↑MLLT3, ↑↑TGFB3                        |
| phosphate                                          | chemical - endogenous<br>mammalian   | $3.98 \times 10^{-2}$ | ↑↑SLC20A1, ↓↓STC2                       |
| COL18A1                                            | other                                | $4.06 \times 10^{-2}$ | ↓↓F2RL1, ↑↑VWF                          |
| FH                                                 | enzyme                               | $4.13 \times 10^{-2}$ | ↑↑AKR1C1/AKR1C2                         |
| SATB2                                              | transcription regulator              | $4.13 \times 10^{-2}$ | ↑↑AUTS2                                 |
| PER2                                               | other                                | $4.13 \times 10^{-2}$ | ↓ALAS1                                  |
| EPHA2                                              | kinase                               | $4.13 \times 10^{-2}$ | ↑↑TJP1                                  |
| TFF3                                               | other                                | $4.13 \times 10^{-2}$ | ↑↑TJP1                                  |
| KLF13                                              | transcription regulator              | $4.13 \times 10^{-2}$ | ↓ALAS1                                  |
| AKT1                                               | kinase                               | $4.22 \times 10^{-2}$ | ↓↓AKR1B10, ↑↑AKR1C1/AKR1C2, ↑↑TGFB3     |
| HSPA9                                              | other                                | $4.46 \times 10^{-2}$ | ↓↓MYCN                                  |
| UCP1                                               | transporter                          | $4.46 \times 10^{-2}$ | ↓ALAS1                                  |
| SDCBP                                              | enzyme                               | $4.46 \times 10^{-2}$ | ↑↑TJP1                                  |
| CCND1                                              | other                                | $4.51 \times 10^{-2}$ | ↑MARK1, ↑↑RBMS3, ↓↓TMEM219              |
| CYP1A1                                             | enzyme                               | $4.56 \times 10^{-2}$ | ↑↑ANXA4, ↑↑MID1                         |
| miR-30c-5p (and other<br>miRNAs w/seed<br>GUAAACA) | mature microRNA                      | $4.64 \times 10^{-2}$ | ↓↓GALNT7, ↑TMEM87A                      |
| PPARG                                              | ligand-dependent nuclear<br>receptor | $4.75 \times 10^{-2}$ | ↑↑ALDH9A1, ↑↑MDH1, ↓↓PYGL, ↑↑TJP1       |
| SLC9A3R1                                           | other                                | $4.80 \times 10^{-2}$ | ↑↑EZR                                   |
| mir-122                                            | microRNA                             | $4.80 \times 10^{-2}$ | ↑MARK1                                  |
| RARA                                               | ligand-dependent nuclear<br>receptor | $4.90 \times 10^{-2}$ | ↓↓MAFB, ↓↓MYCN                          |

---

Symbols for regulators with increased (or decreased) expression and fold-change $\geq$ 2 are preceded with ↑↑ (or ↓↓). Symbols for genes with increased (or decreased) expression and fold-change $<$ 2 are preceded with ↑ (or ↓).

---
