# Supplementary material
Source: PubMed Central journal article supplement (PMC4385968)
Supplement: tableS6.pdf [file tableS6.pdf]

**Table S6. Biofunctions identified by IPA for genes affected in summer cumulus cells**

| Category                                                                                                         | Functions     | Functions Annotation                          | Num. of Molecules | Predicted Activation State | Activation z-score | p-Value               | Molecules                                                                                                                                                                               |
|------------------------------------------------------------------------------------------------------------------|---------------|-----------------------------------------------|-------------------|----------------------------|--------------------|-----------------------|-----------------------------------------------------------------------------------------------------------------------------------------------------------------------------------------|
| Cell Morphology                                                                                                  | sprouting     | sprouting                                     | 10                | Decreased                  | -2.930             | 7.15×10 <sup>-3</sup> | ↑↑ADAMTS1, ↓↓ANGPT2, ↓CAV1, ↓↓CRIP1, ↓↓CYP19A1, ↑↑DCN, ↓HMGB1, ↑↑RGS4, ↓SEPT11, ↓VEGFC                                                                                                  |
| Cancer   Tumor Morphology                                                                                        | invasion      | invasion of tumor                             | 8                 | Decreased                  | -2.630             | 8.33×10 <sup>-6</sup> | ↑↑ALCAM, ↓CAV1, ↓↓CTSV, ↓HMGB1, ↓↓LHCGR, ↓↓MMP1, ↓POSTN, ↓ZEB1                                                                                                                          |
| Cardiovascular System Development and Function                                                                   | angiogenesis  | angiogenesis                                  | 21                | Decreased                  | -2.509             | 1.00×10 <sup>-4</sup> | ↑↑ADAMTS1, ↑↑ALCAM, ↓↓ANGPT2, ↑↑ANGPTL1, ↑↑BTC, ↓CAV1, ↑COL4A2, ↑↑COL4A3, ↑↑DCN, ↓EGLN1, ↓ELK3, ↑↑FOXO1, ↓HMGB1, ↑↑KAT6A, ↓mir-210, ↓↓MMP1, ↑↑RGS4, ↓SMAD7, ↑↑TFPI, ↓VEGFC, ↓ZEB1       |
| Lipid Metabolism   Small Molecule Biochemistry                                                                   | synthesis     | synthesis of lipid                            | 21                | Decreased                  | -2.493             | 2.82×10 <sup>-4</sup> | ↓↓ABCA8, ↑↑AKR1C1/AKR1C2, ↓↓ANGPT2, ↓ARV1, ↓BHMT, ↓↓BNIP3, ↓CAV1, ↓CAV2, ↓CES1, ↓↓CYP19A1, ↑↑FOXO1, ↓GGPS1, ↑↑HPGD, ↓INSIG2, ↓↓LHCGR, ↓PON2, ↓↓PTGIS, ↑↑RHOQ, ↓↓SGMS2, ↓↓ST3GAL5, ↑↑VWF |
| Cellular Movement   Skeletal and Muscular System Development and Function                                        | migration     | migration of vascular smooth muscle cells     | 6                 | Decreased                  | -2.414             | 7.23×10 <sup>-4</sup> | ↓↓ANGPT2, ↓CKLF, ↓HMGB1, ↑↑NOV, ↓POSTN, ↑↑TFPI                                                                                                                                          |
| Cellular Movement   Skeletal and Muscular System Development and Function                                        | migration     | migration of smooth muscle cells              | 7                 | Decreased                  | -2.361             | 9.15×10 <sup>-4</sup> | ↓↓ANGPT2, ↓CKLF, ↓↓CTSV, ↓HMGB1, ↑↑NOV, ↓POSTN, ↑↑TFPI                                                                                                                                  |
| Cellular Development   Cellular Growth and Proliferation   Skeletal and Muscular System Development and Function | proliferation | proliferation of vascular smooth muscle cells | 6                 | Decreased                  | -2.236             | 7.01×10 <sup>-3</sup> | ↓↓ANGPT2, ↓CKLF, ↑↑NOV, ↓POSTN, ↓SKP2, ↑↑TFPI                                                                                                                                           |
| Cardiovascular System Development and Function   Cellular Movement                                               | migration     | migration of endothelial cells                | 13                | Decreased                  | -2.223             | 6.62×10 <sup>-5</sup> | ↑↑ADAMTS1, ↓↓ANGPT2, ↑↑ANGPTL1, ↑↑BTC, ↓CAV1, ↑COL4A2, ↑↑DCN, ↑↑FOXO1, ↓HMGB1, ↓MAP2K6, ↓mir-210, ↑↑TFPI, ↓VEGFC                                                                        |

|                                                                                                                                                         |                |                                      |    |           |        |                       |                                                                                                                                                       |
|---------------------------------------------------------------------------------------------------------------------------------------------------------|----------------|--------------------------------------|----|-----------|--------|-----------------------|-------------------------------------------------------------------------------------------------------------------------------------------------------|
| Cardiovascular System Development and Function   Cell Morphology   Cellular Development   Organismal Development                                        | branching      | branching of endothelial cells       | 5  | Decreased | -2.173 | $7.55 \times 10^{-4}$ | ↓↓ANGPT2, ↑↑DCN, ↓HMGB1, ↑↑RGS4, ↓VEGFC                                                                                                               |
| Cardiovascular System Development and Function   Cellular Development   Cellular Growth and Proliferation   Organismal Development   Tissue Development | proliferation  | proliferation of endothelial cells   | 14 | Decreased | -2.159 | $8.05 \times 10^{-6}$ | ↑↑ADAMTS1, ↓↓ANGPT2, ↑↑ANGPTL1, ↓CAV1, ↓CAV2, ↑COL4A2, ↑↑COL4A3, ↑↑FOXO1, ↓HMGB1, ↓↓MMP1, ↓SKP2, ↑↑TFPI, ↑↑TNFRSF11A, ↓VEGFC                          |
| Cellular Development   Cellular Growth and Proliferation   Skeletal and Muscular System Development and Function                                        | proliferation  | proliferation of muscle cells        | 11 | Decreased | -2.137 | $3.50 \times 10^{-3}$ | ↓↓ANGPT2, ↓CAV1, ↓CKLF, ↑↑FOXO1, ↓HMGB1, ↓↓MMP1, ↑↑NOV, ↓POSTN, ↑↑RGS4, ↓SKP2, ↑↑TFPI                                                                 |
| Nervous System Development and Function   Skeletal and Muscular System Development and Function                                                         | motor function | motor function                       | 5  | Decreased | -1.982 | $5.42 \times 10^{-3}$ | ↓↓ANGPT2, ↓CANX, ↓HMGB1, ↓RIMS2, ↓SLC12A2                                                                                                             |
| Carbohydrate Metabolism                                                                                                                                 | glycolysis     | glycolysis of cells                  | 5  | Decreased | -1.963 | $1.32 \times 10^{-3}$ | ↓CAV1, ↓↓ENO2, ↓mir-210, ↓SKP2, ↓↓SLC2A1                                                                                                              |
| Cardiovascular System Development and Function   Tissue Development                                                                                     | development    | development of cardiovascular tissue | 17 |           | -1.930 | $5.53 \times 10^{-6}$ | ↑↑ADAMTS1, ↓↓ANGPT2, ↑↑ANGPTL1, ↓CAV1, ↓CAV2, ↑COL4A2, ↑↑COL4A3, ↓EGLN1, ↑↑FOXO1, ↓HMGB1, ↓MAP2K6, ↓↓MMP1, ↓SKP2, ↓SMAD7, ↑↑TFPI, ↑↑TNFRSF11A, ↓VEGFC |
| Cardiovascular System Development and Function   Cellular Development   Organismal Development   Tissue Development                                     | development    | endothelial cell development         | 15 |           | -1.928 | $1.22 \times 10^{-5}$ | ↑↑ADAMTS1, ↓↓ANGPT2, ↑↑ANGPTL1, ↓CAV1, ↓CAV2, ↑COL4A2, ↑↑COL4A3, ↑↑FOXO1, ↓HMGB1, ↓MAP2K6, ↓↓MMP1, ↓SKP2, ↑↑TFPI, ↑↑TNFRSF11A, ↓VEGFC                 |
| Cellular Movement                                                                                                                                       | cell movement  | cell movement of muscle cells        | 9  |           | -1.905 | $1.34 \times 10^{-4}$ | ↓↓ANGPT2, ↓CKLF, ↑↑COL4A3, ↓↓CTSV, ↑↑FOXO1, ↓HMGB1, ↑↑NOV, ↓POSTN, ↑↑TFPI                                                                             |

|                                                                           |                  |                                      |    |        |                       |                                                                                                                                                                                                                                                       |
|---------------------------------------------------------------------------|------------------|--------------------------------------|----|--------|-----------------------|-------------------------------------------------------------------------------------------------------------------------------------------------------------------------------------------------------------------------------------------------------|
| Cellular Movement   Skeletal and Muscular System Development and Function | migration        | migration of muscle cells            | 8  | -1.905 | $3.23 \times 10^{-4}$ | ↓↓ANGPT2, ↓CKLF, ↓↓CTSV, ↑↑FOXO1, ↓HMGB1, ↑↑NOV, ↓POSTN, ↑↑TFPI                                                                                                                                                                                       |
| Cardiovascular Disease                                                    | vascular disease | vascular disease                     | 24 | -1.846 | $1.21 \times 10^{-3}$ | ↓↓ANGPT2, ↑↑BMP1B, ↑↑BTC, ↓CAV1, ↓↓CTSV, ↓↓CYP19A1, ↑↑FOXO1, ↓GUCY1B3, ↓HMGB1, ↑↑HPGD, ↑↑KAT6A, ↑↑KCTD12, ↑↑MAP4K4, ↓mir-210, ↓↓MMP1, ↑↑NOV, ↓PDE7B, ↓↓PELP1, ↓↓PYGL, ↑RBFOX1, ↑↑TFPI, ↓↓UST, ↓VEGFC, ↑↑VWF                                           |
| Cardiovascular System Development and Function   Organismal Development   | development      | development of blood vessel          | 26 | -1.813 | $6.89 \times 10^{-6}$ | ↑↑ADAMTS1, ↑↑ALCAM, ↓↓ANGPT2, ↑↑ANGPTL1, ↑↑BTC, ↓CAV1, ↓CAV2, ↑COL4A2, ↑↑COL4A3, ↓↓COL5A1, ↑↑DCN, ↓EGLN1, ↑↑FOXO1, ↓↓GUCY1A3, ↓HMGB1, ↑↑KAT6A, ↓MAP2K6, ↓mir-210, ↓↓MMP1, ↑↑RGS4, ↓SKP2, ↓SMAD7, ↑↑TFPI, ↑↑TNFRSF11A, ↓VEGFC, ↓ZEB1                   |
| Cardiovascular System Development and Function                            | development      | development of cardiovascular system | 28 | -1.813 | $1.01 \times 10^{-4}$ | ↑↑ADAMTS1, ↑↑ALCAM, ↓↓ANGPT2, ↑↑ANGPTL1, ↑↑BTC, ↓CAV1, ↓CAV2, ↑COL4A2, ↑↑COL4A3, ↓↓COL5A1, ↓↓CRIP1, ↑↑DCN, ↓EGLN1, ↑↑FOXO1, ↓↓GUCY1A3, ↓HMGB1, ↑↑KAT6A, ↑↑KCNJ8, ↓MAP2K6, ↓mir-210, ↓↓MMP1, ↑↑RGS4, ↓SKP2, ↓SMAD7, ↑↑TFPI, ↑↑TNFRSF11A, ↓VEGFC, ↓ZEB1 |
| Cardiovascular System Development and Function   Organismal Development   | vasculogenesis   | vasculogenesis                       | 25 | -1.801 | $2.49 \times 10^{-6}$ | ↑↑ADAMTS1, ↑↑ALCAM, ↓↓ANGPT2, ↑↑ANGPTL1, ↑↑BTC, ↓CAV1, ↓CAV2, ↑COL4A2, ↑↑COL4A3, ↑↑DCN, ↓EGLN1, ↑↑FOXO1, ↓↓GUCY1A3, ↓HMGB1, ↑↑KAT6A, ↓MAP2K6, ↓mir-210, ↓↓MMP1, ↑↑RGS4, ↓SKP2, ↓SMAD7, ↑↑TFPI, ↑↑TNFRSF11A, ↓VEGFC, ↓ZEB1                             |

|                                                                                      |                       |                              |    |        |                       |                                                                                                                                                                      |
|--------------------------------------------------------------------------------------|-----------------------|------------------------------|----|--------|-----------------------|----------------------------------------------------------------------------------------------------------------------------------------------------------------------|
| Cancer   Cellular Development   Cellular Growth and Proliferation   Tumor Morphology | proliferation         | proliferation of tumor cells | 20 | -1.800 | $3.07 \times 10^{-3}$ | ↑↑ANGPTL1, ↑↑ANK3, ↓BHMT, ↑↑BTC, ↓CAV1, ↓CDCA7L, ↑↑COL4A3, ↓↓CTSV, ↓↓CYP19A1, ↑↑DCN, ↓HMGB1, ↓MAP2K6, ↓↓MMP1, ↑↑NOV, ↑↑RGS4, ↓↓RYR2, ↓SKP2, ↓TES, ↓VEGFC, ↓ZEB1      |
| Developmental Disorder   Skeletal and Muscular Disorders                             | muscular hypertrophy  | muscular hypertrophy         | 8  | -1.794 | $1.19 \times 10^{-3}$ | ↓↓ANGPT2, ↓CAV1, ↓HMGB1, ↓MAP2K6, ↓↓MMP1, ↑↑RGS4, ↓↓RYR2, ↓SMAD7                                                                                                     |
| Cardiovascular Disease                                                               | disorder of artery    | disorder of artery           | 19 | -1.741 | $3.07 \times 10^{-3}$ | ↓↓ANGPT2, ↑↑BMPR1B, ↓CAV1, ↓↓CTSV, ↓↓CYP19A1, ↑↑FOXO1, ↓GUCY1B3, ↓HMGB1, ↑↑HPGD, ↑↑KAT6A, ↑↑KCTD12, ↑↑MAP4K4, ↓↓MMP1, ↓PDE7B, ↓↓PELP1, ↑RBFOX1, ↑↑TFPI, ↓↓UST, ↑↑VWF |
| Organismal Injury and Abnormalities                                                  | interstitial fibrosis | interstitial fibrosis        | 6  | -1.698 | $3.12 \times 10^{-4}$ | ↓↓ANGPT2, ↓CAV1, ↑↑COL4A3, ↑↑DCN, ↓POSTN, ↓SKP2                                                                                                                      |
| Cell Death and Survival                                                              | cell death            | cell death of kidney cells   | 11 | -1.553 | $3.25 \times 10^{-3}$ | ↓↓BNIP3, ↓CCBL1, ↑↑DCN, ↑↑FOXO1, ↓MAP2K6, ↑↑PKN2, ↓↓PTGIS, ↑↑RGS4, ↓SMAD7, ↓TMX1, ↓ZEB1                                                                              |
| Developmental Disorder                                                               | hypertrophy           | hypertrophy of cells         | 11 | -1.518 | $3.81 \times 10^{-4}$ | ↓↓ANGPT2, ↓CAV1, ↓↓CYP19A1, ↓HMGB1, ↓↓LHCGR, ↓MAP2K6, ↓↓MMP1, ↑↑RGS4, ↓↓RYR2, ↓SKP2, ↓SMAD7                                                                          |
| Cancer                                                                               | development           | development of tumor         | 12 | -1.510 | $5.22 \times 10^{-4}$ | ↑↑ADAMTS1, ↑↑ALCAM, ↑↑ANGPTL1, ↓CAV1, ↑↑COL4A3, ↓HMGB1, ↓↓MMP1, ↑↑NOV, ↓POSTN, ↓↓PTGIS, ↓SKP2, ↓VEGFC                                                                |
| Cell Morphology   Skeletal and Muscular System Development and Function              | size                  | size of muscle cells         | 5  | -1.471 | $8.97 \times 10^{-3}$ | ↓↓ANGPT2, ↓CAV2, ↑↑FOXO1, ↓MAP2K6, ↑↑RGS4                                                                                                                            |

|                         |            |            |    |       |                       |                                                                                                                                                                                                                                                                                                                                                                                                                                                                                                                                                                                                                                                                                |
|-------------------------|------------|------------|----|-------|-----------------------|--------------------------------------------------------------------------------------------------------------------------------------------------------------------------------------------------------------------------------------------------------------------------------------------------------------------------------------------------------------------------------------------------------------------------------------------------------------------------------------------------------------------------------------------------------------------------------------------------------------------------------------------------------------------------------|
| Cell Death and Survival | apoptosis  | apoptosis  | 50 | 1.470 | $5.27 \times 10^{-3}$ | <p> ↑↑ADAMTS1, ↑↑ALCAM, ↓↓ANGPT2,<br/> ↑↑ANGPTL1, ↑↑ANXA4, ↑↑BMPR1B,<br/> ↓↓BNIP3, ↑↑BTC, ↓CANX, ↓CAV1, ↓CDK8,<br/> ↑COL4A2, ↑↑COL4A3, ↓↓CTSV,<br/> ↓↓CYP19A1, ↓↓DAPK1, ↑↑DCN, ↓↓DDIT4,<br/> ↓FANK1, ↑↑FOXO1, ↓HMGB1, ↓IKBIP,<br/> ↑↑INPP4A, ↓↓LHCGR, ↓MAP2K6, ↓mir-<br/> 210, ↓↓MMP1, ↓NME5, ↓↓PELP1, ↑↑PKN2,<br/> ↓PON2, ↓↓PTGIS, ↓RASD1, ↑↑RGS4,<br/> ↓↓RYSR2, ↓↓SGMS2, ↓SKP2, ↑↑SLC20A1,<br/> ↓↓SLC2A1, ↓SMAD7, ↑↑SND1,<br/> ↓↓SORBS2, ↓STYXL1, ↑↑SYNE1, ↑↑TFPI,<br/> ↓TMX1, ↑↑TNFRSF11A, ↓TYMS, ↓VEGFC,<br/> ↓ZEB1 </p>                                                                                                                                                   |
| Cell Death and Survival | cell death | cell death | 65 | 1.464 | $5.78 \times 10^{-4}$ | <p> ↑↑ADAMTS1, ↑↑ALCAM, ↓↓ANGPT2,<br/> ↑↑ANGPTL1, ↑↑ANXA4, ↓↓ATP2B1,<br/> ↑↑BMPR1B, ↓↓BNIP3, ↑↑BTC, ↓CANX,<br/> ↓CAV1, ↓CCBL1, ↓CDK8, ↓CES1,<br/> ↑COL4A2, ↑↑COL4A3, ↓↓CTSV,<br/> ↓↓CYP19A1, ↑CYP2B6, ↓↓DAPK1, ↑↑DCN,<br/> ↓↓DDIT4, ↑↑DPP8, ↑↑DST, ↓↓DYNC111,<br/> ↓EGLN1, ↓FANK1, ↑↑FOXO1, ↓GGPS1,<br/> ↓GUCY1B3, ↓HMGB1, ↓IKBIP, ↑↑INPP4A,<br/> ↓↓LHCGR, ↑↑MAML2, ↓MAP2K6, ↓mir-<br/> 210, ↓↓MMP1, ↑MT1X, ↓NME5, ↓↓PELP1,<br/> ↑↑PKN2, ↓PON2, ↓POSTN, ↓↓PTGIS,<br/> ↓RASD1, ↑↑RGS4, ↓↓RYSR2, ↓↓SGMS2,<br/> ↓SKP2, ↓SLC12A2, ↑↑SLC20A1,<br/> ↓↓SLC2A1, ↓SMAD7, ↑↑SND1,<br/> ↓↓SORBS2, ↓STYXL1, ↑↑SYNE1, ↑↑TFPI,<br/> ↓TMX1, ↑↑TNFRSF11A, ↑TOX, ↓TYMS,<br/> ↓VEGFC, ↓ZEB1 </p> |

|                                                         |              |                       |    |        |                       |                                                                                                                                                                                                                                                       |
|---------------------------------------------------------|--------------|-----------------------|----|--------|-----------------------|-------------------------------------------------------------------------------------------------------------------------------------------------------------------------------------------------------------------------------------------------------|
| Cellular Movement                                       | invasion     | invasion of cells     | 27 | -1.436 | $1.72 \times 10^{-6}$ | ↑↑ADAMTS1, ↑↑ALCAM, ↓↓ANGPT2,<br>↓ASAP1, ↓BCAT1, ↑↑BTC, ↓CAV1,<br>↓↓CTSV, ↑↑DCN, ↓HMGB1, ↓MAP2K6,<br>↑↑MAP4K4, ↓mir-210, ↓↓MMP1, ↑↑NOV,<br>↓POSTN, ↑↑RGS4, ↓RNF144A, ↑↑RORA,<br>↓SEPT11, ↓SKP2, ↓SLC12A2, ↓↓SLC2A1,<br>↓SMAD7, ↓VEGFC, ↓ZEB1, ↓ZNF350 |
| Cancer   Cardiovascular System Development and Function | angiogenesis | angiogenesis of tumor | 5  | -1.387 | $2.73 \times 10^{-3}$ | ↑↑ADAMTS1, ↑↑ANGPTL1, ↑↑COL4A3,<br>↓↓MMP1, ↓VEGFC                                                                                                                                                                                                     |

|                                                                                   |                      |                                |     |        |                       |                                                                                                                                                                                                                                                                                                                                                                                                                                                                                                                                                                                                                                                                                                                                                                                                                                                                                                                                                                                                                       |
|-----------------------------------------------------------------------------------|----------------------|--------------------------------|-----|--------|-----------------------|-----------------------------------------------------------------------------------------------------------------------------------------------------------------------------------------------------------------------------------------------------------------------------------------------------------------------------------------------------------------------------------------------------------------------------------------------------------------------------------------------------------------------------------------------------------------------------------------------------------------------------------------------------------------------------------------------------------------------------------------------------------------------------------------------------------------------------------------------------------------------------------------------------------------------------------------------------------------------------------------------------------------------|
| Cancer                                                                            | epithelial neoplasia | epithelial neoplasia           | 107 | -1.385 | $3.13 \times 10^{-5}$ | <p>           ↓↓ABCA8, ↑ACPP, ↓↓ACTN2, ↑↑ADAMTS1, ↓AJUBA, ↑↑AKR1C1/AKR1C2, ↑↑ALCAM, ↑↑ALG6, ↓ALG9, ↓↓ANGPT2, ↑↑ANGPTL1, ↑↑ANK3, ↑↑ANKRD28, ↑↑ANXA4, ↓ARV1, ↓ASAP1, ↓↓ATP2B1, ↓BCAT1, ↓BHMT, ↑↑BMPR1B, ↓↓BNIP3, ↓CANX, ↓CAV1, ↓↓CBWD3/CBWD6, ↓CDK8, ↓CES1, ↓CHST7, ↓CKLF, ↓↓COL12A1, ↑↑COL14A1, ↑COL4A2, ↓↓COX4I1, ↓↓CTSV, ↓↓CYP19A1, ↓↓DAPK1, ↓DCAF13, ↓↓DCLK1, ↑↑DCN, ↑↑DST, ↓↓ELAVL2, ↓↓ENO2, ↓ETAA1, ↑↑FAM13A, ↓FANK1, ↑↑FOXO1, ↓GGPS1, ↑↑GPR116, ↓↓GUCY1A3, ↓H3F3A/H3F3B, ↓HMCN1, ↓HMGB1, ↑↑HPGD, ↓IFT81, ↓↓JAKMIP2, ↑↑KAT6A, ↓↓KCNAB1, ↓KCTD1, ↓↓LHCGR, ↑↑MAML2, ↑↑MAP4K4, ↓↓MCC, ↓mir-210, ↓↓MMP1, ↓↓MT-ND2, ↓↓MT-ND4L, ↑MT1X, ↓NIN, ↑↑NOV, ↓↓OLFM4, ↑↑PABPC1, ↓PARP11, ↓↓PDZRN3, ↓↓PELP1, ↓↓PID1, ↑↑PKN2, ↓PON2, ↓POSTN, ↑↑PRICKLE1, ↓PROSC, ↓↓PTGIS, ↓RARS2, ↓↓RGS7, ↑↑RHOQ, ↓↓RHPN2, ↓↓RIF1, ↓RIMS2, ↓↓RIN2, ↑↑RORA, ↓↓RZR2, ↑SHC4, ↓↓SHISA2, ↓SKP2, ↓SLC12A2, ↓↓SLC2A1, ↓SMAD7, ↑↑SND1, ↑↑SYNE1, ↓TES, ↑↑TFPI, ↓↓TNFAIP6, ↑TOX, ↓TYMS, ↓↓UGT1A9 (includes others), ↓↓UST, ↓VEGFC, ↑↑VWF, ↓ZEB1         </p> |
| Cardiovascular Disease   Developmental Disorder   Skeletal and Muscular Disorders | hypertrophy          | hypertrophy of cardiomyocytes  | 6   | -1.380 | $2.22 \times 10^{-3}$ | <p>           ↓↓ANGPT2, ↓CAV1, ↓HMGB1, ↓MAP2K6, ↑↑RGS4, ↓SMAD7         </p>                                                                                                                                                                                                                                                                                                                                                                                                                                                                                                                                                                                                                                                                                                                                                                                                                                                                                                                                           |
| Molecular Transport   Nucleic Acid Metabolism   Small Molecule Biochemistry       | quantity             | quantity of cyclic nucleotides | 7   | -1.380 | $7.70 \times 10^{-3}$ | <p>           ↓CAV1, ↓CAV2, ↑↑COL4A3, ↓EGLN1, ↓↓GUCY1A3, ↓GUCY1B3, ↓↓LHCGR         </p>                                                                                                                                                                                                                                                                                                                                                                                                                                                                                                                                                                                                                                                                                                                                                                                                                                                                                                                               |

|                                                                                                                     |               |                                      |    |        |                       |                                                                                                                                                                                                                                                                                                                                                                                                                                                                                                                                                                                                                                      |
|---------------------------------------------------------------------------------------------------------------------|---------------|--------------------------------------|----|--------|-----------------------|--------------------------------------------------------------------------------------------------------------------------------------------------------------------------------------------------------------------------------------------------------------------------------------------------------------------------------------------------------------------------------------------------------------------------------------------------------------------------------------------------------------------------------------------------------------------------------------------------------------------------------------|
| Cellular Growth and Proliferation                                                                                   | proliferation | proliferation of cells               | 70 | -1.358 | $2.95 \times 10^{-4}$ | <p> ↑ACPP, ↑↑ADAMTS1, ↓AJUBA, ↑↑AKR1C1/AKR1C2, ↑↑ALCAM, ↓↓ANGPT2, ↑↑ANGPTL1, ↑↑ANK3, ↓ARV1, ↓BCAT1, ↓BHMT, ↑↑BMPR1B, ↓↓BNIP3, ↑↑BTC, ↓CAV1, ↓CAV2, ↓CDCA7L, ↓CDK8, ↓CKLF, ↑↑COL14A1, ↑COL4A2, ↑↑COL4A3, ↓↓CRIP1, ↓↓CTSV, ↓↓CYP19A1, ↑CYP2B6, ↓↓DAPK1, ↑↑DCN, ↓EGLN1, ↑↑FOXO1, ↓GLCE, ↓HMGB1, ↑↑HNRNPD, ↑↑HPGD, ↑↑INPP4A, ↓IRX3, ↓↓LHCGR, ↓MAP2K6, ↑↑MAP4K4, ↓↓MCC, ↓↓MMP1, ↓↓MT-ND2, ↑↑NOV, ↓↓PELP1, ↓POSTN, ↓RABEP1, ↓RASD1, ↑↑RGS4, ↑↑RORA, ↓↓RYR2, ↑SEPT6, ↓SKP2, ↓SLC12A2, ↑↑SLC20A1, ↓↓SLC26A2, ↓↓SLC2A1, ↓SMAD7, ↓SMYD3, ↑↑SND1, ↓↓STC2, ↓TES, ↑↑TFPI, ↓↓TNFAIP6, ↑↑TNFRSF11A, ↑TOX, ↓TYMS, ↓VEGFC, ↑↑VWF, ↓ZEB1, ↓ZNF350 </p> |
| Cellular Movement                                                                                                   | migration     | migration of tumor cell lines        | 17 | -1.357 | $1.79 \times 10^{-3}$ | <p> ↓↓ANGPT2, ↑↑ANKRD28, ↓CAV1, ↓CKLF, ↑↑COL4A3, ↑↑DCN, ↑↑HPGD, ↑↑MAP4K4, ↓mir-210, ↓↓MMP1, ↑↑NOV, ↓POSTN, ↓RNF144A, ↑SHC4, ↓SLC12A2, ↓↓SLC2A1, ↓VEGFC </p>                                                                                                                                                                                                                                                                                                                                                                                                                                                                          |
| Cellular Movement   Hematological System Development and Function   Immune Cell Trafficking   Inflammatory Response | infiltration  | infiltration of macrophages          | 6  | 1.342  | $5.51 \times 10^{-3}$ | <p> ↓↓ANGPT2, ↓CAV1, ↓CES1, ↑↑COL4A3, ↓EGLN1, ↓SMAD7 </p>                                                                                                                                                                                                                                                                                                                                                                                                                                                                                                                                                                            |
| Cell Death and Survival                                                                                             | cell death    | cell death of kidney cell lines      | 10 | -1.289 | $3.09 \times 10^{-3}$ | <p> ↓↓BNIP3, ↓CCBL1, ↑↑FOXO1, ↓MAP2K6, ↑↑PKN2, ↓↓PTGIS, ↑↑RGS4, ↓SMAD7, ↓TMX1, ↓ZEB1 </p>                                                                                                                                                                                                                                                                                                                                                                                                                                                                                                                                            |
| Cellular Development   Cellular Growth and Proliferation   Skeletal and Muscular System Development and Function    | proliferation | proliferation of smooth muscle cells | 10 | -1.265 | $1.21 \times 10^{-3}$ | <p> ↓↓ANGPT2, ↓CAV1, ↓CKLF, ↑↑FOXO1, ↓HMGB1, ↓↓MMP1, ↑↑NOV, ↓POSTN, ↓SKP2, ↑↑TFPI </p>                                                                                                                                                                                                                                                                                                                                                                                                                                                                                                                                               |



|                                                                                                                     |               |                                  |   |        |                       |                                                                 |
|---------------------------------------------------------------------------------------------------------------------|---------------|----------------------------------|---|--------|-----------------------|-----------------------------------------------------------------|
| Cell Signaling   Molecular Transport   Small Molecule Biochemistry                                                  | release       | release of nitric oxide          | 6 | -1.195 | $2.75 \times 10^{-4}$ | ↓↓ANGPT2, ↓CAV1, ↓HMGB1, ↓SMAD7, ↑↑TFPI, ↓VEGFC                 |
| Cellular Movement   Hematological System Development and Function   Immune Cell Trafficking   Inflammatory Response | cell movement | cell movement of macrophages     | 8 | 1.180  | $8.57 \times 10^{-3}$ | ↓↓ANGPT2, ↓CAV1, ↓CES1, ↓CKLF, ↑↑COL4A3, ↓EGLN1, ↓HMGB1, ↓SMAD7 |
| Cell-To-Cell Signaling and Interaction   Connective Tissue Development and Function                                 | binding       | binding of fibroblast cell lines | 4 | 1.154  | $1.21 \times 10^{-3}$ | ↑↑ALCAM, ↓↓DAPK1, ↓↓LHCGR, ↑↑TFPI                               |
| Cancer   Organ Development   Respiratory Disease                                                                    | metastasis    | metastasis of lung               | 4 | 1.154  | $2.91 \times 10^{-3}$ | ↑↑ADAMTS1, ↑↑SND1, ↑↑TNFRSF11A, ↓VEGFC                          |

|        |           |                    |     |        |                       |                                                                                                                                                                                                                                                                                                                                                                                                                                                                                                                                                                                                                                                                                                                                                                                                                                                                                                                                                                                                                                                                                                                                                                                                                                                                                                                                                                                                                   |
|--------|-----------|--------------------|-----|--------|-----------------------|-------------------------------------------------------------------------------------------------------------------------------------------------------------------------------------------------------------------------------------------------------------------------------------------------------------------------------------------------------------------------------------------------------------------------------------------------------------------------------------------------------------------------------------------------------------------------------------------------------------------------------------------------------------------------------------------------------------------------------------------------------------------------------------------------------------------------------------------------------------------------------------------------------------------------------------------------------------------------------------------------------------------------------------------------------------------------------------------------------------------------------------------------------------------------------------------------------------------------------------------------------------------------------------------------------------------------------------------------------------------------------------------------------------------|
| Cancer | carcinoma | carcinoma          | 103 | -1.153 | $4.09 \times 10^{-5}$ | <p>           ↓↓ABCA8, ↑ACPP, ↓↓ACTN2,<br/>           ↑↑ADAMTS1, ↓AJUBA,<br/>           ↑↑AKR1C1/AKR1C2, ↑↑ALCAM, ↑↑ALG6,<br/>           ↓ALG9, ↓↓ANGPT2, ↑↑ANGPTL1,<br/>           ↑↑ANK3, ↑↑ANKRD28, ↑↑ANXA4, ↓ARV1,<br/>           ↓ASAP1, ↓↓ATP2B1, ↓BCAT1, ↓BHMT,<br/>           ↑↑BMPR1B, ↓↓BNIP3, ↓CANX, ↓CAV1,<br/>           ↓↓CBWD3/CBWD6, ↓CES1, ↓CHST7,<br/>           ↓CKLF, ↓↓COL12A1, ↑↑COL14A1,<br/>           ↑COL4A2, ↓↓COX4I1, ↓↓CTSV,<br/>           ↓↓CYP19A1, ↓↓DAPK1, ↓DCAF13,<br/>           ↓↓DCLK1, ↑↑DCN, ↑↑DST, ↓↓ELAVL2,<br/>           ↓↓ENO2, ↓ETAA1, ↑↑FAM13A, ↓FANK1,<br/>           ↑↑FOXO1, ↓GGPS1, ↑↑GPR116,<br/>           ↓↓GUCY1A3, ↓HMCN1, ↓HMGB1,<br/>           ↑↑HPGD, ↓IFT81, ↓↓JAKMIP2, ↑↑KAT6A,<br/>           ↓KCTD1, ↓↓LHCGR, ↑↑MAML2,<br/>           ↑↑MAP4K4, ↓↓MCC, ↓mir-210, ↓↓MMP1,<br/>           ↓↓MT-ND2, ↓↓MT-ND4L, ↑MT1X, ↓NIN,<br/>           ↑↑NOV, ↓↓OLFM4, ↑↑PABPC1, ↓PARP11,<br/>           ↓↓PDZRN3, ↓↓PELP1, ↓↓PID1, ↑↑PKN2,<br/>           ↓PON2, ↓POSTN, ↑↑PRICKLE1, ↓PROSC,<br/>           ↓RARS2, ↓↓RGS7, ↑↑RHOQ, ↓↓RHPN2,<br/>           ↓↓RIF1, ↓RIMS2, ↓↓RIN2, ↑↑RORA,<br/>           ↓↓RYR2, ↑SHC4, ↓↓SHISA2, ↓SKP2,<br/>           ↓SLC12A2, ↓↓SLC2A1, ↓SMAD7, ↑↑SND1,<br/>           ↑↑SYNE1, ↓TES, ↑↑TFPI, ↓↓TNFAIP6,<br/>           ↑TOX, ↓TYMS, ↓↓UGT1A9 (includes<br/>           others), ↓↓UST, ↓VEGFC, ↑↑VWF, ↓ZEB1         </p> |
| Cancer | neoplasia | neoplasia of cells | 11  | 1.081  | $3.56 \times 10^{-3}$ | <p>           ↑↑ADAMTS1, ↓↓ANGPT2, ↑↑ANGPTL1,<br/>           ↓CAV1, ↑COL4A2, ↓↓DAPK1, ↓SKP2,<br/>           ↑↑SND1, ↑↑TNFRSF11A, ↓ZEB1, ↓ZNF350         </p>                                                                                                                                                                                                                                                                                                                                                                                                                                                                                                                                                                                                                                                                                                                                                                                                                                                                                                                                                                                                                                                                                                                                                                                                                                                      |

|                                                                                                    |                      |                                       |    |        |                       |                                                                                                                                                                                                                                                                                                                                                             |
|----------------------------------------------------------------------------------------------------|----------------------|---------------------------------------|----|--------|-----------------------|-------------------------------------------------------------------------------------------------------------------------------------------------------------------------------------------------------------------------------------------------------------------------------------------------------------------------------------------------------------|
| Cellular Development   Cellular Growth and Proliferation                                           | proliferation        | proliferation of tumor cell lines     | 40 | -1.073 | 9.57×10 <sup>-6</sup> | ↑ACPP, ↑↑ADAMTS1, ↓AJUBA, ↓↓ANGPT2, ↑↑ANGPTL1, ↑↑BMPR1B, ↓↓BNIP3, ↑↑BTC, ↓CAV1, ↓CDK8, ↑↑COL14A1, ↑COL4A2, ↑↑COL4A3, ↓↓CYP19A1, ↑CYP2B6, ↓↓DAPK1, ↑↑DCN, ↑↑FOXO1, ↓HMGB1, ↑↑HPGD, ↓MAP2K6, ↑↑MAP4K4, ↓↓MMP1, ↓↓MT-ND2, ↑↑NOV, ↓↓PELP1, ↓POSTN, ↓RASD1, ↑↑RORA, ↓SKP2, ↓↓SLC26A2, ↓↓SLC2A1, ↓SMAD7, ↑↑SND1, ↓TES, ↑↑TNFRSF11A, ↓TYMS, ↓VEGFC, ↓ZEB1, ↓ZNF350 |
| Cancer                                                                                             | benign neoplasia     | benign neoplasia                      | 19 | -1.067 | 2.53×10 <sup>-3</sup> | ↓↓ABCA8, ↑↑ALCAM, ↓↓ANGPT2, ↑↑ANGPTL1, ↓BHMT, ↓↓CYP19A1, ↓↓DAPK1, ↓↓DCLK1, ↑↑DCN, ↑↑DST, ↑↑FOXO1, ↓↓LHCGR, ↓↓MMP1, ↑↑NOV, ↓↓PTGIS, ↑↑RORA, ↓↓SLC2A1, ↓↓SORBS2, ↓ZEB1                                                                                                                                                                                        |
| Cancer   Cellular Development   Cellular Growth and Proliferation   Reproductive System Disease    | neoplasia            | neoplasia of breast cancer cell lines | 4  | 1.067  | 4.94×10 <sup>-3</sup> | ↑↑ADAMTS1, ↑↑ANGPTL1, ↑↑SND1, ↑↑TNFRSF11A                                                                                                                                                                                                                                                                                                                   |
| Energy Production   Lipid Metabolism   Small Molecule Biochemistry                                 | oxidation            | oxidation of lipid                    | 8  | 1.034  | 1.99×10 <sup>-3</sup> | ↑↑AKR1C1/AKR1C2, ↓BDH2, ↓↓CYP19A1, ↑CYP2B6, ↑↑FOXO1, ↑↑HPGD, ↓PON2, ↓↓SLC2A1                                                                                                                                                                                                                                                                                |
| Cancer   Cellular Development   Cellular Growth and Proliferation                                  | neoplasia            | neoplasia of tumor cell lines         | 10 | 1.019  | 3.68×10 <sup>-4</sup> | ↑↑ADAMTS1, ↓↓ANGPT2, ↑↑ANGPTL1, ↓CAV1, ↑COL4A2, ↓↓DAPK1, ↓SKP2, ↑↑SND1, ↑↑TNFRSF11A, ↓ZNF350                                                                                                                                                                                                                                                                |
| Organismal Development                                                                             | formation            | formation of vessel                   | 6  | -1.000 | 1.60×10 <sup>-3</sup> | ↑↑ADAMTS1, ↓↓ANGPT2, ↑COL4A2, ↓HMGB1, ↓mir-210, ↓VEGFC                                                                                                                                                                                                                                                                                                      |
| Cancer   Dermatological Diseases and Conditions                                                    | hyperplasia          | hyperplasia of skin                   | 4  | 1.000  | 7.75×10 <sup>-3</sup> | ↓CAV1, ↓↓CTSV, ↓SMAD7, ↓VEGFC                                                                                                                                                                                                                                                                                                                               |
| Connective Tissue Development and Function   Skeletal and Muscular System Development and Function | bone mineral density | bone mineral density                  | 6  | -0.970 | 1.03×10 <sup>-2</sup> | ↓↓CYP19A1, ↑↑DCN, ↑↑FOXO1, ↓↓LHCGR, ↓POSTN, ↑↑TNFRSF11A                                                                                                                                                                                                                                                                                                     |

|                                                                      |                  |                                   |    |        |                       |                                                                                                                                                                                                                                                                                                                                                                                                              |
|----------------------------------------------------------------------|------------------|-----------------------------------|----|--------|-----------------------|--------------------------------------------------------------------------------------------------------------------------------------------------------------------------------------------------------------------------------------------------------------------------------------------------------------------------------------------------------------------------------------------------------------|
| Lipid Metabolism   Molecular Transport   Small Molecule Biochemistry | concentration    | concentration of lipid            | 20 | -0.968 | $3.98 \times 10^{-3}$ | ↑ACPP, ↓↓ANGPT2, ↓BHMT, ↓CAV1, ↓CES1, ↑↑COL4A3, ↓↓CYP19A1, ↑↑FOXO1, ↑↑GPR116, ↑↑HPGD, ↑↑INPP4A, ↓↓LHCGR, ↓PON2, ↓↓PTGIS, ↑↑RGS4, ↑↑RORA, ↓↓SGMS2, ↓SLC12A2, ↓↓ST3GAL5, ↑↑TFPI                                                                                                                                                                                                                                |
| Cell Morphology                                                      | size             | size of cells                     | 11 | -0.913 | $5.64 \times 10^{-3}$ | ↓↓ANGPT2, ↓BHMT, ↓CAV2, ↓↓CYP19A1, ↑↑FOXO1, ↓↓LHCGR, ↓MAP2K6, ↓PON2, ↑↑RGS4, ↓SEPT11, ↓SLC12A2                                                                                                                                                                                                                                                                                                               |
| Organismal Survival                                                  | organismal death | organismal death                  | 45 | 0.866  | $8.86 \times 10^{-3}$ | ↑↑ADAMTS1, ↓↓ANGPT2, ↑↑ANK3, ↓↓ATP2B1, ↑↑BTC, ↓CANX, ↓CAV1, ↓↓COL12A1, ↑COL4A2, ↑↑COL4A3, ↓↓COL5A1, ↓↓CTSV, ↑↑DCN, ↓EGLN1, ↓ELK3, ↑↑FOXO1, ↓GLCE, ↑↑GPR116, ↓↓GUCY1A3, ↓GUCY1B3, ↓H3F3A/H3F3B, ↓HMGB1, ↑↑HNRNPD, ↑↑HPGD, ↓INSIG2, ↑↑KAT6A, ↓↓KCNAB1, ↑↑KCNJ8, ↑↑NOV, ↓POSTN, ↑↑RGS4, ↓↓RIF1, ↓RIMS2, ↑↑RORA, ↓↓RYSR2, ↓↓SHISA2, ↓SLC12A2, ↑↑SLC20A1, ↓↓SLC2A1, ↓SMAD7, ↑↑SYNE1, ↑↑TFPI, ↓VEGFC, ↑↑VWF, ↓ZEB1 |
| Lipid Metabolism   Molecular Transport   Small Molecule Biochemistry | quantity         | quantity of steroid               | 14 | -0.860 | $1.75 \times 10^{-3}$ | ↓↓ANGPT2, ↓BHMT, ↓CAV1, ↓CES1, ↑↑COL4A3, ↓↓CYP19A1, ↑↑FOXO1, ↑↑GPR116, ↑↑HPGD, ↓↓LHCGR, ↑↑RORA, ↓SLC12A2, ↓↓ST3GAL5, ↑↑TFPI                                                                                                                                                                                                                                                                                  |
| Cellular Movement                                                    | cell movement    | cell movement of tumor cell lines | 18 | -0.826 | $8.71 \times 10^{-3}$ | ↓↓ANGPT2, ↑↑ANKRD28, ↓CAV1, ↓CKLF, ↑↑COL4A3, ↑↑DCN, ↑↑HPGD, ↑↑MAP4K4, ↓mir-210, ↓↓MMP1, ↑↑NOV, ↓POSTN, ↓RNF144A, ↑SHC4, ↓SLC12A2, ↓↓SLC2A1, ↓↓ST3GAL5, ↓VEGFC                                                                                                                                                                                                                                                |
| Cellular Movement                                                    | migration        | migration of carcinoma cell lines | 6  | -0.816 | $5.87 \times 10^{-4}$ | ↓CAV1, ↓mir-210, ↓↓MMP1, ↑↑NOV, ↓POSTN, ↓VEGFC                                                                                                                                                                                                                                                                                                                                                               |

|                                                   |                   |                                     |    |        |                       |                                                                                                                |
|---------------------------------------------------|-------------------|-------------------------------------|----|--------|-----------------------|----------------------------------------------------------------------------------------------------------------|
| Cellular Movement                                 | migration         | migration of tumor cells            | 8  | -0.816 | $2.85 \times 10^{-3}$ | ↑↑ALCAM, ↓↓ANGPT2, ↓CAV1, ↓HMGB1, ↑↑NOV, ↓POSTN, ↑↑TFPI, ↓ZEB1                                                 |
| Cellular Movement                                 | invasion          | invasion of brain cancer cell lines | 4  | -0.775 | $6.72 \times 10^{-3}$ | ↓ASAP1, ↓HMGB1, ↓SLC12A2, ↓↓SLC2A1                                                                             |
| Gastrointestinal Disease   Hepatic System Disease | hepatic steatosis | hepatic steatosis                   | 8  | 0.775  | $8.05 \times 10^{-3}$ | ↓BHMT, ↓CAV1, ↓↓CYP19A1, ↓EGLN1, ↑↑FOXO1, ↓INSIG2, ↓PDE7B, ↑↑RORA                                              |
| Cardiovascular System Development and Function    | heart rate        | heart rate                          | 11 | 0.747  | $3.32 \times 10^{-4}$ | ↓↓ANGPT2, ↑↑ANK3, ↓↓CTSV, ↓↓CYP19A1, ↑↑KCNJ8, ↓MAP2K6, ↓↓MMP1, ↑↑RGS4, ↓↓RYR2, ↓SMAD7, ↑↑SYNE1                 |
| DNA Replication, Recombination, and Repair        | synthesis         | synthesis of DNA                    | 13 | -0.747 | $1.55 \times 10^{-3}$ | ↓↓ANGPT2, ↑↑BMPR1B, ↑↑BTC, ↓CAV1, ↑↑COL14A1, ↑↑FOXO1, ↓↓GUCY1A3, ↓GUCY1B3, ↑↑NOV, ↑↑RGS4, ↓SKP2, ↓SMAD7, ↓TYMS |

|                                                                    |               |                                         |     |        |                       |                                                                                                                                                                                                                                                                                                                                                                                                                                                                                                                                                                                                                                                                                                                                                                                                                                                                                                                                                                                                                                                                                                                                                                 |
|--------------------------------------------------------------------|---------------|-----------------------------------------|-----|--------|-----------------------|-----------------------------------------------------------------------------------------------------------------------------------------------------------------------------------------------------------------------------------------------------------------------------------------------------------------------------------------------------------------------------------------------------------------------------------------------------------------------------------------------------------------------------------------------------------------------------------------------------------------------------------------------------------------------------------------------------------------------------------------------------------------------------------------------------------------------------------------------------------------------------------------------------------------------------------------------------------------------------------------------------------------------------------------------------------------------------------------------------------------------------------------------------------------|
| Cancer                                                             | cancer        | Cancer                                  | 128 | -0.740 | 4.48×10 <sup>-6</sup> | ↓↓ABCA8, ↑ACPP, ↓↓ACTN2,<br>↑↑ADAMTS1, ↓AJUBA,<br>↑↑AKR1C1/AKR1C2, ↑↑ALCAM, ↑↑ALG6,<br>↓ALG9, ↓↓ANGPT2, ↑↑ANGPTL1,<br>↑↑ANK3, ↑↑ANKRD28, ↑↑ANXA4, ↓ARV1,<br>↓ASAP1, ↓↓ATP2B1, ↓BCAT1, ↓BHMT,<br>↑↑BMPR1B, ↓↓BNIP3, ↓C9orf91, ↓CANX,<br>↓CAV1, ↓↓CBWD3/CBWD6, ↓CDCA7L,<br>↓CES1, ↓CHST7, ↓CKLF, ↓↓COL12A1,<br>↑↑COL14A1, ↑COL4A2, ↓↓COX4I1,<br>↑↑CPEB4, ↓↓CRIP1, ↓↓CTSV, ↓↓CYP19A1,<br>↑CYP2B6, ↓↓DAPK1, ↓DCAF13, ↓↓DCLK1,<br>↑↑DCN, ↓↓DDIT4, ↑↑DST, ↓↓DYNC1I1,<br>↓EGLN1, ↓↓ELAVL2, ↓↓ENO2, ↓ETAA1,<br>↑↑FAM13A, ↓FANK1, ↑↑FOXO1, ↓GGPS1,<br>↑↑GPR116, ↓↓GUCY1A3, ↓H3F3A/H3F3B,<br>↓HMCN1, ↓HMGB1, ↑↑HPGD, ↓IFT81,<br>↓↓JAKMIP2, ↑↑KAT6A, ↓↓KCNAB1,<br>↑↑KCNJ8, ↓KCTD1, ↓↓LHCGR,<br>↓↓LRRC49, ↑↑MAML2, ↓MAP2K6,<br>↑↑MAP4K4, ↓↓MCC, ↓mir-210, ↓↓MMP1,<br>↓↓MT-ND2, ↓↓MT-ND4L, ↑MT1X, ↓NIN,<br>↑↑NOV, ↓↓OLFM4, ↑↑PABPC1, ↓PARP11,<br>↓PDE7B, ↓↓PDZRN3, ↓↓PELP1, ↓↓PID1,<br>↑↑PKN2, ↓PON2, ↓POSTN, ↑↑PRICKLE1,<br>↓PROSC, ↓↓PTGIS, ↓RARS2, ↑RBFOX1,<br>↑↑RGS4, ↓↓RGS7, ↑↑RHOQ, ↓↓RHPN2,<br>↓↓RIF1, ↓RIMS2, ↓↓RIN2, ↓RNF144A,<br>↑↑RORA, ↓↓RYR2, ↑SEPT6, ↑SHC4,<br>↓↓SHISA2, ↓SKP2, ↓SLC12A2,<br>↓↓SLC26A2, ↓↓SLC2A1, ↓SMAD7,<br>↑↑SND1, ↓STON1, ↓STYXL1, ↑↑SYNE1, |
| Cell Death and Survival                                            | apoptosis     | apoptosis of kidney cell lines          | 8   | -0.726 | 5.81×10 <sup>-3</sup> | ↑↑FOXO1, ↓MAP2K6, ↑↑PKN2, ↓↓PTGIS,<br>↑↑RGS4, ↓SMAD7, ↓TMX1, ↓ZEB1                                                                                                                                                                                                                                                                                                                                                                                                                                                                                                                                                                                                                                                                                                                                                                                                                                                                                                                                                                                                                                                                                              |
| Tissue Development                                                 | tubulation    | tubulation of epithelial tissue         | 6   | -0.689 | 8.01×10 <sup>-4</sup> | ↑↑BTC, ↓CAV1, ↑↑COL4A3, ↑↑FOXO1,<br>↓MAP2K6, ↑↑RGS4                                                                                                                                                                                                                                                                                                                                                                                                                                                                                                                                                                                                                                                                                                                                                                                                                                                                                                                                                                                                                                                                                                             |
| Cardiovascular System Development and Function   Cellular Movement | cell movement | cell movement of endothelial cell lines | 5   | -0.687 | 3.14×10 <sup>-3</sup> | ↑↑ALCAM, ↓↓ANGPT2, ↓HMGB1,<br>↑↑RGS4, ↓VEGFC                                                                                                                                                                                                                                                                                                                                                                                                                                                                                                                                                                                                                                                                                                                                                                                                                                                                                                                                                                                                                                                                                                                    |

|                                                                                        |                   |                                |    |        |                       |                                                                                                                                                                                                                                                                                                                                                                                                                                                                                                                                                                                                                                                                                                                                                                                                                                                                                                                                                                                                                                                                                                                                                                                                                                                                                                                                                                                                                                                                                                                                                                                                                                                         |
|----------------------------------------------------------------------------------------|-------------------|--------------------------------|----|--------|-----------------------|---------------------------------------------------------------------------------------------------------------------------------------------------------------------------------------------------------------------------------------------------------------------------------------------------------------------------------------------------------------------------------------------------------------------------------------------------------------------------------------------------------------------------------------------------------------------------------------------------------------------------------------------------------------------------------------------------------------------------------------------------------------------------------------------------------------------------------------------------------------------------------------------------------------------------------------------------------------------------------------------------------------------------------------------------------------------------------------------------------------------------------------------------------------------------------------------------------------------------------------------------------------------------------------------------------------------------------------------------------------------------------------------------------------------------------------------------------------------------------------------------------------------------------------------------------------------------------------------------------------------------------------------------------|
| Neurological Disease                                                                   | movement disorder | Movement Disorders             | 25 | 0.685  | $4.33 \times 10^{-3}$ | <p> <math>\downarrow\downarrow</math>ACTN2, <math>\uparrow\uparrow</math>ANK3, <math>\downarrow\downarrow</math>ATP2B1, <math>\downarrow</math>CANX, <math>\downarrow</math>CAV1, <math>\uparrow\uparrow</math>COL4A3, <math>\downarrow\downarrow</math>CTSV, <math>\downarrow\downarrow</math>CYP19A1, <math>\uparrow\uparrow</math>DNAJC1, <math>\downarrow\downarrow</math>DYNC111, <math>\downarrow</math>EGLN1, <math>\downarrow\downarrow</math>ELAVL2, <math>\downarrow\downarrow</math>ENO2, <math>\downarrow</math>GUCY1B3, <math>\downarrow</math>H3F3A/H3F3B, <math>\downarrow\downarrow</math>KCNAB1, <math>\uparrow</math>MT1X, <math>\uparrow</math>RBFOX1, <math>\uparrow\uparrow</math>RGS4, <math>\uparrow\uparrow</math>RORA, <math>\uparrow</math>SEPT6, <math>\downarrow</math>SLC12A2, <math>\downarrow\downarrow</math>SLC2A1, <math>\downarrow\downarrow</math>ST3GAL5, <math>\uparrow\uparrow</math>SYNE1 </p>                                                                                                                                                                                                                                                                                                                                                                                                                                                                                                                                                                                                                                                                                                                  |
| Cancer   Cellular Development   Cellular Growth and Proliferation<br>Cellular Movement | metastasis        | metastasis of tumor cell lines | 8  | 0.684  | $3.05 \times 10^{-5}$ | <p> <math>\uparrow\uparrow</math>ADAMTS1, <math>\downarrow\downarrow</math>ANGPT2, <math>\uparrow\uparrow</math>ANGPTL1, <math>\downarrow</math>CAV1, <math>\uparrow</math>COL4A2, <math>\downarrow\downarrow</math>DAPK1, <math>\uparrow\uparrow</math>SND1, <math>\downarrow</math>ZNF350 </p>                                                                                                                                                                                                                                                                                                                                                                                                                                                                                                                                                                                                                                                                                                                                                                                                                                                                                                                                                                                                                                                                                                                                                                                                                                                                                                                                                        |
|                                                                                        | invasion          | invasion of tumor cell lines   | 20 | -0.677 | $2.52 \times 10^{-5}$ | <p> <math>\uparrow\uparrow</math>ADAMTS1, <math>\downarrow</math>ASAP1, <math>\uparrow\uparrow</math>BTC, <math>\downarrow</math>CAV1, <math>\uparrow\uparrow</math>DCN, <math>\downarrow</math>HMGB1, <math>\downarrow</math>MAP2K6, <math>\uparrow\uparrow</math>MAP4K4, <math>\downarrow</math>mir-210, <math>\downarrow\downarrow</math>MMP1, <math>\uparrow\uparrow</math>NOV, <math>\downarrow</math>POSTN, <math>\downarrow</math>RNF144A, <math>\uparrow\uparrow</math>RORA, <math>\downarrow</math>SKP2, <math>\downarrow</math>SLC12A2, <math>\downarrow\downarrow</math>SLC2A1, <math>\downarrow</math>SMAD7, <math>\downarrow</math>ZEB1, <math>\downarrow</math>ZNF350 </p>                                                                                                                                                                                                                                                                                                                                                                                                                                                                                                                                                                                                                                                                                                                                                                                                                                                                                                                                                                |
| Organismal Development                                                                 | size              | size of body                   | 21 | -0.660 | $4.26 \times 10^{-3}$ | <p> <math>\uparrow\uparrow</math>ADAMTS1, <math>\uparrow\uparrow</math>BTC, <math>\downarrow</math>CANX, <math>\downarrow</math>CAV1, <math>\downarrow\downarrow</math>COL12A1, <math>\uparrow\uparrow</math>COL4A3, <math>\uparrow\uparrow</math>DCN, <math>\downarrow</math>GLCE, <math>\uparrow\uparrow</math>GPR116, <math>\downarrow</math>GUCY1B3, <math>\uparrow\uparrow</math>HNRNPD, <math>\downarrow\downarrow</math>LHCGR, <math>\downarrow</math>POSTN, <math>\downarrow\downarrow</math>RGS7, <math>\downarrow</math>RIMS2, <math>\downarrow</math>SKP2, <math>\downarrow</math>SLC12A2, <math>\downarrow</math>SMAD7, <math>\downarrow\downarrow</math>STC2, <math>\uparrow\uparrow</math>SYNE1, <math>\uparrow\uparrow</math>TNFRSF11A </p>                                                                                                                                                                                                                                                                                                                                                                                                                                                                                                                                                                                                                                                                                                                                                                                                                                                                                              |
| Cellular Movement                                                                      | migration         | migration of cells             | 47 | -0.655 | $2.65 \times 10^{-6}$ | <p> <math>\uparrow\uparrow</math>ADAMTS1, <math>\downarrow</math>AJUBA, <math>\uparrow\uparrow</math>ALCAM, <math>\downarrow\downarrow</math>ANGPT2, <math>\uparrow\uparrow</math>ANGPTL1, <math>\uparrow\uparrow</math>ANKRD28, <math>\downarrow</math>ASAP1, <math>\downarrow</math>ASAP2, <math>\downarrow</math>BCAT1, <math>\uparrow\uparrow</math>BTC, <math>\downarrow</math>CAV1, <math>\downarrow</math>CES1, <math>\downarrow</math>CKLF, <math>\uparrow</math>COL4A2, <math>\uparrow\uparrow</math>COL4A3, <math>\downarrow\downarrow</math>CTSV, <math>\downarrow\downarrow</math>CYP19A1, <math>\downarrow\downarrow</math>DCLK1, <math>\uparrow\uparrow</math>DCN, <math>\downarrow</math>EGLN1, <math>\downarrow</math>ELK3, <math>\uparrow\uparrow</math>FOXO1, <math>\downarrow\downarrow</math>GUCY1A3, <math>\downarrow</math>GUCY1B3, <math>\downarrow</math>HMGB1, <math>\uparrow\uparrow</math>HPGD, <math>\downarrow</math>MAP2K6, <math>\uparrow\uparrow</math>MAP4K4, <math>\downarrow</math>mir-210, <math>\downarrow\downarrow</math>MMP1, <math>\uparrow\uparrow</math>NOV, <math>\downarrow\downarrow</math>OLFM4, <math>\downarrow</math>PON2, <math>\downarrow</math>POSTN, <math>\downarrow</math>RABEP1, <math>\uparrow\uparrow</math>RGS4, <math>\downarrow</math>RNF144A, <math>\uparrow</math>SHC4, <math>\downarrow</math>SKP2, <math>\downarrow</math>SLC12A2, <math>\downarrow\downarrow</math>SLC2A1, <math>\downarrow</math>SMAD7, <math>\uparrow\uparrow</math>TFPI, <math>\uparrow\uparrow</math>TNFRSF11A, <math>\downarrow</math>VEGFC, <math>\uparrow\uparrow</math>VWF, <math>\downarrow</math>ZEB1 </p> |

|                                                                                                |                |                                    |    |        |                       |                                                                                                                                                                                                                                                                                                                                                                                                                                                                 |
|------------------------------------------------------------------------------------------------|----------------|------------------------------------|----|--------|-----------------------|-----------------------------------------------------------------------------------------------------------------------------------------------------------------------------------------------------------------------------------------------------------------------------------------------------------------------------------------------------------------------------------------------------------------------------------------------------------------|
| Cell Death and Survival                                                                        | apoptosis      | apoptosis of epithelial cell lines | 8  | -0.647 | $3.60 \times 10^{-3}$ | ↓↓BNIP3, ↑↑FOXO1, ↓MAP2K6, ↑↑PKN2, ↓↓PTGIS, ↑↑RGS4, ↓TMX1, ↓ZEB1                                                                                                                                                                                                                                                                                                                                                                                                |
| Cancer   Cellular Movement   Tumor Morphology                                                  | invasion       | invasion of tumor cells            | 7  | -0.640 | $3.17 \times 10^{-3}$ | ↑↑ALCAM, ↓ASAP1, ↑↑BTC, ↓↓MMP1, ↑↑NOV, ↓POSTN, ↓VEGFC                                                                                                                                                                                                                                                                                                                                                                                                           |
| Cancer                                                                                         | metastasis     | metastasis of cells                | 9  | 0.602  | $1.04 \times 10^{-4}$ | ↑↑ADAMTS1, ↓↓ANGPT2, ↑↑ANGPTL1, ↓CAV1, ↑COL4A2, ↓↓DAPK1, ↑↑SND1, ↓ZEB1, ↓ZNF350                                                                                                                                                                                                                                                                                                                                                                                 |
| Cardiovascular System Development and Function   Hematological System Development and Function | blood pressure | blood pressure                     | 10 | 0.593  | $3.09 \times 10^{-3}$ | ↓↓ANGPT2, ↓CAV1, ↑↑COL4A3, ↓↓CYP19A1, ↓↓GUCY1A3, ↓GUCY1B3, ↓↓PTGIS, ↑↑RORA, ↓SLC12A2, ↓VEGFC                                                                                                                                                                                                                                                                                                                                                                    |
| Cell Morphology                                                                                | tubulation     | tubulation of cells                | 7  | -0.481 | $3.50 \times 10^{-4}$ | ↑↑ALCAM, ↑↑BTC, ↓CAV1, ↑↑COL4A3, ↑↑FOXO1, ↓MAP2K6, ↑↑RGS4                                                                                                                                                                                                                                                                                                                                                                                                       |
| Cardiovascular Disease   Developmental Disorder                                                | hypertrophy    | hypertrophy of heart               | 8  | 0.417  | $7.56 \times 10^{-3}$ | ↓↓ANGPT2, ↓CAV1, ↓↓CYP19A1, ↓↓GUCY1A3, ↓MAP2K6, ↓mir-210, ↓↓MMP1, ↓POSTN                                                                                                                                                                                                                                                                                                                                                                                        |
| Developmental Disorder                                                                         | hypertrophy    | Hypertrophy                        | 15 | -0.397 | $6.62 \times 10^{-4}$ | ↓↓ANGPT2, ↓CAV1, ↓↓CYP19A1, ↓↓GUCY1A3, ↓HMGB1, ↓↓LHCGR, ↓MAP2K6, ↓mir-210, ↓↓MMP1, ↓POSTN, ↓↓PTGIS, ↑↑RGS4, ↓↓RYR2, ↓SKP2, ↓SMAD7                                                                                                                                                                                                                                                                                                                               |
| Cell Death and Survival                                                                        | necrosis       | necrosis                           | 52 | 0.376  | $9.35 \times 10^{-4}$ | ↑↑ADAMTS1, ↓↓ANGPT2, ↑↑ANGPTL1, ↓↓ATP2B1, ↑↑BMP1B, ↓↓BNIP3, ↑↑BTC, ↓CAV1, ↓CCBL1, ↓CDK8, ↓CES1, ↑COL4A2, ↑↑COL4A3, ↓↓CTSV, ↓↓CYP19A1, ↓↓DAPK1, ↑↑DCN, ↓↓DDIT4, ↑↑DPP8, ↑↑DST, ↓↓DYNC111, ↓EGLN1, ↑↑FOXO1, ↓GGPS1, ↓GUCY1B3, ↓HMGB1, ↑↑MAML2, ↓MAP2K6, ↓mir-210, ↓↓MMP1, ↑MT1X, ↓↓PELP1, ↑↑PKN2, ↓PON2, ↓POSTN, ↓↓PTGIS, ↓RASD1, ↑↑RGS4, ↓↓RYR2, ↓↓SGMS2, ↓SKP2, ↑↑SLC20A1, ↓↓SLC2A1, ↓SMAD7, ↑↑SND1, ↓STYXL1, ↑↑SYNE1, ↓TMX1, ↑↑TNFRSF11A, ↓TYMS, ↓VEGFC, ↓ZEB1 |



|                                                                                      |               |                                           |    |        |                       |                                                                                                                                                                                                                                          |
|--------------------------------------------------------------------------------------|---------------|-------------------------------------------|----|--------|-----------------------|------------------------------------------------------------------------------------------------------------------------------------------------------------------------------------------------------------------------------------------|
| Organismal Injury and Abnormalities   Tissue Morphology                              | size          | size of lesion                            | 9  | 0.373  | $2.11 \times 10^{-3}$ | ↑↑BMPR1B, ↓↓BNIP3, ↓CAV1, ↓CES1, ↓↓CTSV, ↓EGLN1, ↑↑FOXO1, ↓HMGB1, ↑↑VWF                                                                                                                                                                  |
| Cancer                                                                               | hyperplasia   | hyperplasia                               | 14 | 0.365  | $8.23 \times 10^{-3}$ | ↑↑BTC, ↓CAV1, ↑↑COL4A3, ↓↓CTSV, ↓↓CYP19A1, ↑↑DCN, ↓↓MMP1, ↓POSTN, ↓RIMS2, ↑↑RORA, ↓SKP2, ↓SMAD7, ↑↑TNFRSF11A, ↓VEGFC                                                                                                                     |
| Organismal Development                                                               | morphology    | morphology of body cavity                 | 28 | 0.341  | $4.88 \times 10^{-4}$ | ↑↑ADAMTS1, ↓BHMT, ↑↑BMPR1B, ↑↑BTC, ↓CAV1, ↓CAV2, ↓↓CYP19A1, ↑↑DCN, ↓EGLN1, ↓ELK3, ↓GLCE, ↑↑GPR116, ↓GUCY1B3, ↑↑HPGD, ↑↑KAT6A, ↓↓LHCGR, ↓MAP2K6, ↑↑NOV, ↓POSTN, ↓↓RYR2, ↓SKP2, ↑↑SLC20A1, ↓SMAD7, ↑↑SYNE1, ↓TES, ↑↑TNFRSF11A, ↑TOX, ↓ZEB1 |
| Cancer                                                                               | hyperplasia   | hyperplasia of tissue                     | 5  | 0.339  | $1.04 \times 10^{-3}$ | ↑↑BTC, ↓CAV1, ↓↓CYP19A1, ↑↑DCN, ↓↓MMP1                                                                                                                                                                                                   |
| Cellular Development   Cellular Growth and Proliferation                             | proliferation | proliferation of breast cancer cell lines | 15 | -0.313 | $9.44 \times 10^{-5}$ | ↑↑ADAMTS1, ↑↑BTC, ↓CAV1, ↓↓CYP19A1, ↑↑DCN, ↑↑FOXO1, ↑↑HPGD, ↓MAP2K6, ↓↓PELP1, ↑↑RORA, ↓SKP2, ↑↑SND1, ↓TES, ↓TYMS, ↓ZEB1                                                                                                                  |
| Lipid Metabolism   Molecular Transport   Small Molecule Biochemistry                 | accumulation  | accumulation of lipid                     | 9  | -0.311 | $6.94 \times 10^{-3}$ | ↓BHMT, ↓CAV1, ↑↑COL14A1, ↑↑FOXO1, ↓HMGB1, ↓INSIG2, ↓PON2, ↑↑RGS4, ↓↓SGMS2                                                                                                                                                                |
| Cellular Growth and Proliferation                                                    | proliferation | proliferation of gonadal cells            | 4  | -0.308 | $1.01 \times 10^{-2}$ | ↑↑BTC, ↑↑FOXO1, ↓↓LHCGR, ↓↓TNFAIP6                                                                                                                                                                                                       |
| Organismal Injury and Abnormalities   Renal and Urological Disease                   | fibrosis      | fibrosis of kidney                        | 5  | -0.283 | $1.24 \times 10^{-3}$ | ↑↑COL4A3, ↑↑DCN, ↓↓PTGIS, ↓SKP2, ↓SMAD7                                                                                                                                                                                                  |
| Cardiovascular System Development and Function   Cellular Movement                   | migration     | migration of endothelial cell lines       | 4  | 0.254  | $8.11 \times 10^{-3}$ | ↑↑ALCAM, ↓HMGB1, ↑↑RGS4, ↓VEGFC                                                                                                                                                                                                          |
| Cancer   Cellular Development   Cellular Growth and Proliferation   Tumor Morphology | proliferation | proliferation of malignant tumor          | 11 | -0.243 | $3.37 \times 10^{-3}$ | ↑↑ANGPTL1, ↑↑ANK3, ↓BHMT, ↓CDCA7L, ↑↑DCN, ↓HMGB1, ↓↓MMP1, ↓↓RYR2, ↓TES, ↓VEGFC, ↓ZEB1                                                                                                                                                    |

|                                                                                               |                                   |                                       |    |        |                       |                                                                                                                                                                                                                                                                     |
|-----------------------------------------------------------------------------------------------|-----------------------------------|---------------------------------------|----|--------|-----------------------|---------------------------------------------------------------------------------------------------------------------------------------------------------------------------------------------------------------------------------------------------------------------|
| Cell Death and Survival                                                                       | survival                          | cell survival                         | 30 | -0.218 | $3.40 \times 10^{-3}$ | ↑↑ADAMTS1, ↑↑ALCAM, ↓↓ANGPT2, ↑↑ANGPTL1, ↓↓BNIP3, ↑↑BTC, ↓CAV1, ↓CDCA7L, ↓CDK8, ↑↑COL4A3, ↑↑DPP8, ↑↑DST, ↓↓DYNC1I1, ↑↑FOXO1, ↓↓GUCY1A3, ↓HMGB1, ↑↑INPP4A, ↓MAP2K6, ↓mir-210, ↓↓MMP1, ↑↑NOV, ↓↓OPN3, ↓POSTN, ↓↓RYR2, ↓↓SLC2A1, ↓SMAD7, ↑↑SND1, ↑↑TFPI, ↓TYMS, ↓VEGFC |
| Lipid Metabolism   Molecular Transport   Small Molecule Biochemistry                          | concentration                     | concentration of cholesterol          | 10 | -0.185 | $1.82 \times 10^{-3}$ | ↓BHMT, ↓CAV1, ↓CES1, ↑↑COL4A3, ↓↓CYP19A1, ↑↑FOXO1, ↑↑GPR116, ↑↑RORA, ↓↓ST3GAL5, ↑↑TFPI                                                                                                                                                                              |
| Cellular Growth and Proliferation                                                             | colony formation                  | colony formation of tumor cell lines  | 8  | 0.173  | $9.11 \times 10^{-3}$ | ↓CAV1, ↓CDCA7L, ↑↑HPGD, ↑MT1X, ↓RASD1, ↓SMAD7, ↓TES, ↓ZEB1                                                                                                                                                                                                          |
| Cellular Development                                                                          | epithelial-mesenchymal transition | epithelial-mesenchymal transition     | 6  | -0.172 | $8.78 \times 10^{-3}$ | ↓CAV1, ↑↑FOXO1, ↓POSTN, ↓SMAD7, ↑↑TNFRSF11A, ↓ZEB1                                                                                                                                                                                                                  |
| Cardiovascular System Development and Function   Organ Morphology                             | contraction                       | contraction of heart                  | 7  | 0.152  | $2.32 \times 10^{-3}$ | ↓↓ANGPT2, ↑↑ANK3, ↓↓CTSV, ↓MAP2K6, ↓↓MMP1, ↓↓RYR2, ↓SMAD7                                                                                                                                                                                                           |
| Cell-To-Cell Signaling and Interaction   Renal and Urological System Development and Function | binding                           | binding of kidney cell lines          | 4  | 0.147  | $2.39 \times 10^{-3}$ | ↑↑ALCAM, ↓CAV1, ↓↓DAPK1, ↓↓LHCGR                                                                                                                                                                                                                                    |
| Cardiovascular System Development and Function   Tissue Morphology                            | permeability                      | permeability of blood vessel          | 4  | -0.132 | $6.39 \times 10^{-3}$ | ↓↓ANGPT2, ↓CAV1, ↓VEGFC, ↑↑VWF                                                                                                                                                                                                                                      |
| Cellular Development   Cellular Growth and Proliferation                                      | proliferation                     | proliferation of carcinoma cell lines | 9  | -0.113 | $9.53 \times 10^{-3}$ | ↓CAV1, ↑↑FOXO1, ↓HMGB1, ↓↓MMP1, ↑↑NOV, ↓RASD1, ↓SKP2, ↓SMAD7, ↓ZEB1                                                                                                                                                                                                 |
| Cancer   Respiratory Disease                                                                  | lung cancer                       | lung cancer                           | 19 | 0.109  | $8.37 \times 10^{-3}$ | ↓↓ACTN2, ↑↑ADAMTS1, ↑↑ANGPTL1, ↓CAV1, ↓↓CYP19A1, ↓↓ENO2, ↓GGPS1, ↑↑HPGD, ↑↑MAP4K4, ↓↓MMP1, ↓↓OLFM4, ↓↓PTGIS, ↓↓RGS7, ↑↑SND1, ↑↑TNFRSF11A, ↓TYMS, ↓↓UGT1A9 (includes others), ↓VEGFC, ↑↑VWF                                                                          |

|                      |                 |                                     |    |        |                       |                                                                                                                                                                                                                                                                                                                                                                                                                                                         |
|----------------------|-----------------|-------------------------------------|----|--------|-----------------------|---------------------------------------------------------------------------------------------------------------------------------------------------------------------------------------------------------------------------------------------------------------------------------------------------------------------------------------------------------------------------------------------------------------------------------------------------------|
| Cellular Development | differentiation | differentiation of tumor cell lines | 13 | 0.101  | $7.34 \times 10^{-4}$ | <p>↓AJUBA, ↓BDH2, ↑↑BTC, ↓↓ELAVL2, ↓HMGB1, ↑↑KAT6A, ↓MAP2K6, ↓↓MCC, ↑↑NOV, ↓↓PELP1, ↑↑RHOQ, ↓SMAD7, ↑↑TNFRSF11A</p>                                                                                                                                                                                                                                                                                                                                     |
| Cellular Movement    | cell movement   | cell movement                       | 50 | -0.095 | $4.66 \times 10^{-6}$ | <p>↑↑ADAMTS1, ↓AJUBA, ↑↑AKAP4, ↑↑ALCAM, ↓↓ANGPT2, ↑↑ANGPTL1, ↑↑ANKRD28, ↓ASAP1, ↓ASAP2, ↓BCAT1, ↑↑BTC, ↓CAV1, ↓CES1, ↓CKLF, ↑COL4A2, ↑↑COL4A3, ↓↓CTSV, ↓↓CYP19A1, ↓↓DCLK1, ↑↑DCN, ↑↑DST, ↓EGLN1, ↓ELK3, ↑↑FOXO1, ↓↓GUCY1A3, ↓GUCY1B3, ↓HMGB1, ↑↑HPGD, ↓MAP2K6, ↑↑MAP4K4, ↓mir-210, ↓↓MMP1, ↑↑NOV, ↓↓OLFM4, ↓PON2, ↓POSTN, ↓RABEP1, ↑↑RGS4, ↓RNF144A, ↑SHC4, ↓SKP2, ↓SLC12A2, ↓↓SLC2A1, ↓SMAD7, ↓↓ST3GAL5, ↑↑TFPI, ↑↑TNFRSF11A, ↓VEGFC, ↑↑VWF, ↓ZEB1</p> |
| Cancer               | metastasis      | metastasis                          | 25 | -0.073 | $4.64 \times 10^{-7}$ | <p>↑↑ADAMTS1, ↑↑AKR1C1/AKR1C2, ↓↓ANGPT2, ↑↑ANGPTL1, ↑↑ANK3, ↓CAV1, ↓CDCA7L, ↑COL4A2, ↓↓CYP19A1, ↓↓DAPK1, ↓GGPS1, ↓HMGB1, ↓↓LHCGR, ↓↓MMP1, ↓↓PDZRN3, ↑↑RGS4, ↑↑SND1, ↓TES, ↑↑TFPI, ↑↑TNFRSF11A, ↓↓TRIM9, ↓TYMS, ↓VEGFC, ↓ZEB1, ↓ZNF350</p>                                                                                                                                                                                                               |

|                                                |                       |                       |    |        |                       |                                                                                                                                                                                                                                                                                                                                                                                                                                                                                                                                                                                                                                                                                                                                          |
|------------------------------------------------|-----------------------|-----------------------|----|--------|-----------------------|------------------------------------------------------------------------------------------------------------------------------------------------------------------------------------------------------------------------------------------------------------------------------------------------------------------------------------------------------------------------------------------------------------------------------------------------------------------------------------------------------------------------------------------------------------------------------------------------------------------------------------------------------------------------------------------------------------------------------------------|
| Cancer   Gastrointestinal Disease              | digestive organ tumor | digestive organ tumor | 79 | -0.068 | $1.64 \times 10^{-5}$ | <p> ↑ACPP, ↑↑ADAMTS1, ↑↑AKR1C1/AKR1C2, ↑↑ALCAM, ↓ALG9, ↓↓ANGPT2, ↑↑ANK3, ↑↑ANKRD28, ↑↑ANXA4, ↓ARV1, ↓ASAP1, ↓BHMT, ↑↑BMPR1B, ↓↓BNIP3, ↓CANX, ↓CAV1, ↓↓CBWD3/CBWD6, ↓CES1, ↓CKLF, ↓↓COL12A1, ↑↑COL14A1, ↑COL4A2, ↑↑CPEB4, ↓↓CRIP1, ↓↓CTSV, ↓↓DAPK1, ↓DCAF13, ↓↓DCLK1, ↑↑DCN, ↑↑DST, ↓↓ELAVL2, ↓ETAA1, ↓FANK1, ↑↑GPR116, ↓↓GUCY1A3, ↓HMCN1, ↓HMGB1, ↓IFT81, ↑↑KAT6A, ↑↑KCNJ8, ↓↓LHCGR, ↑↑MAP4K4, ↓↓MCC, ↓mir-210, ↓↓MT-ND4L, ↑MT1X, ↓NIN, ↑↑NOV, ↓↓OLFM4, ↓PARP11, ↓↓PDZRN3, ↓↓PELP1, ↓POSTN, ↓↓PTGIS, ↑↑RGS4, ↑↑RHOQ, ↓↓RHPN2, ↓↓RIF1, ↓RIMS2, ↓↓RIN2, ↑↑RORA, ↓↓RZR2, ↑SHC4, ↓SKP2, ↓SLC12A2, ↓↓SLC26A2, ↓↓SLC2A1, ↓SMAD7, ↑↑SYNE1, ↓TES, ↑↑TFPI, ↓↓TNFAIP6, ↑TOX, ↓↓TRIM9, ↓TYMS, ↓↓UGT1A9 (includes others), ↓↓UST, ↓VEGFC, ↑↑VWF </p> |
| Lipid Metabolism   Small Molecule Biochemistry | conversion            | conversion of lipid   | 6  | -0.059 | $6.80 \times 10^{-3}$ | <p> ↑↑AKR1C1/AKR1C2, ↓↓CYP19A1, ↑CYP2B6, ↑↑HPGD, ↓↓PTGIS, ↓↓SGMS2 </p>                                                                                                                                                                                                                                                                                                                                                                                                                                                                                                                                                                                                                                                                   |
| Cardiovascular Disease                         | heart disease         | Heart Disease         | 29 | -0.055 | $2.53 \times 10^{-5}$ | <p> ↓↓ACTN2, ↓↓ANGPT2, ↑↑BMPR1B, ↑↑BTC, ↓CAV1, ↓↓CYP19A1, ↓EGLN1, ↓↓ENO2, ↑↑FOXO1, ↓↓GUCY1A3, ↓GUCY1B3, ↓HMGB1, ↑↑HPGD, ↑↑KAT6A, ↑↑KCNJ8, ↓MAP2K6, ↓mir-210, ↓↓MMP1, ↑↑NOV, ↓PDE7B, ↓↓PELP1, ↓POSTN, ↑RBFOX1, ↑↑RGS4, ↓↓RZR2, ↑↑SLC20A1, ↓SMAD7, ↑↑TFPI, ↑↑VWF </p>                                                                                                                                                                                                                                                                                                                                                                                                                                                                      |

|                                                                                                    |                               |                                 |    |       |                       |                                                                                                                                                                                                                                                                                                                                                                                                                                                                                                                                                                                                                                                                                                                                                                                                                                                                             |
|----------------------------------------------------------------------------------------------------|-------------------------------|---------------------------------|----|-------|-----------------------|-----------------------------------------------------------------------------------------------------------------------------------------------------------------------------------------------------------------------------------------------------------------------------------------------------------------------------------------------------------------------------------------------------------------------------------------------------------------------------------------------------------------------------------------------------------------------------------------------------------------------------------------------------------------------------------------------------------------------------------------------------------------------------------------------------------------------------------------------------------------------------|
| Cellular Development   Cellular Growth and Proliferation   Nervous System Development and Function | proliferation                 | proliferation of neuronal cells | 7  | 0.000 | $4.73 \times 10^{-3}$ | ↑↑ANK3, ↑↑BTC, ↑↑FOXO1, ↓HMGB1, ↓IRX3, ↓SLC12A2, ↓VEGFC                                                                                                                                                                                                                                                                                                                                                                                                                                                                                                                                                                                                                                                                                                                                                                                                                     |
| Cardiovascular Disease                                                                             | infarction                    | Infarction                      | 9  | 0     | $8.70 \times 10^{-3}$ | ↓↓BNIP3, ↓CAV1, ↓EGLN1, ↓↓GUCY1A3, ↓GUCY1B3, ↓HMGB1, ↓POSTN, ↑↑TFPI, ↑↑VWF                                                                                                                                                                                                                                                                                                                                                                                                                                                                                                                                                                                                                                                                                                                                                                                                  |
| Cancer                                                                                             | malignant neoplasm of abdomen | malignant neoplasm of abdomen   | 94 |       | $9.66 \times 10^{-8}$ | ↓↓ABCA8, ↑ACPP, ↑↑ADAMTS1, ↑↑AKR1C1/AKR1C2, ↑↑ALCAM, ↓ALG9, ↓↓ANGPT2, ↑↑ANK3, ↑↑ANKRD28, ↑↑ANXA4, ↓ARV1, ↓ASAP1, ↓↓ATP2B1, ↓BHMT, ↑↑BMPR1B, ↓↓BNIP3, ↓CANX, ↓CAV1, ↓↓CBWD3/CBWD6, ↓CES1, ↓CKLF, ↓↓COL12A1, ↑↑COL14A1, ↑COL4A2, ↑↑CPEB4, ↓↓CRIP1, ↓↓CTSV, ↓↓CYP19A1, ↓↓DAPK1, ↓DCAF13, ↓↓DCLK1, ↑↑DCN, ↑↑DST, ↓↓DYNC111, ↓↓ELAVL2, ↓ETAA1, ↑↑FAM13A, ↓FANK1, ↑↑FOXO1, ↓GGPS1, ↑↑GPR116, ↓↓GUCY1A3, ↓HMCN1, ↓HMGB1, ↓IFT81, ↓↓JAKMIP2, ↑↑KAT6A, ↑↑KCNJ8, ↓KCTD1, ↓↓LHCGR, ↓MAP2K6, ↑↑MAP4K4, ↓↓MCC, ↓mir-210, ↓↓MMP1, ↓↓MT-ND4L, ↑MT1X, ↓NIN, ↑↑NOV, ↓↓OLFM4, ↓PARP11, ↓↓PDZRN3, ↓↓PELP1, ↓POSTN, ↓↓PTGIS, ↑↑RGS4, ↑↑RHOQ, ↓↓RHPN2, ↓↓RIF1, ↓RIMS2, ↓↓RIN2, ↓RNF144A, ↑↑RORA, ↓↓RYR2, ↑SHC4, ↓SKP2, ↓SLC12A2, ↓↓SLC26A2, ↓↓SLC2A1, ↓SMAD7, ↑↑SND1, ↓STON1, ↑↑SYNE1, ↑↑TFPI, ↓↓TNFAIP6, ↑TOX, ↓↓TRIM9, ↓TYMS, ↓↓UGT1A9 (includes others), ↓↓UST, ↓VEGFC, ↑↑VWF, ↓ZEB1, ↓ZNF350 |

Cancer

endometrioid  
carcinoma

endometrioid  
carcinoma

60

$2.61 \times 10^{-6}$  ↓↓ABCA8, ↑↑ADAMTS1,  
↑↑AKR1C1/AKR1C2, ↓↓ANGPT2, ↑↑ANK3,  
↑↑ANKRD28, ↓↓ATP2B1, ↓BCAT1,  
↓↓C8orf47, ↓CES1, ↓↓COL12A1,  
↑↑COL14A1, ↓↓COL5A1, ↓↓DAPK1,  
↓DCAF13, ↓↓DCLK1, ↑↑DCN, ↑↑DST,  
↓↓DYNC111, ↑↑FOXO1, ↓HMCN1, ↓IKBIP,  
↑↑INPP4A, ↓IRX3, ↓↓JAKMIP2, ↑↑KAT6A,  
↓↓KCNAB1, ↓LRRC27, ↑↑MAML2,  
↓MAP2K6, ↓↓MCC, ↓↓MMP1, ↓MRPL44,  
↑↑PABPC1, ↓↓PABPC4L, ↓PARP11,  
↓PDE7B, ↓RABEP1, ↓↓RFTN2, ↓↓RIF1,  
↓RIMS2, ↓↓RYR2, ↓↓SAP30, ↑SEPT6,  
↓SLC12A2, ↑↑SLC20A1, ↑↑SLC7A2,  
↓↓SORBS2, ↓SPATA7, ↓↓ST3GAL5,  
↑↑SYNE1, ↓↓TNFAIP6, ↑↑TNFRSF11A,  
↑TOX, ↓↓TRIM9, ↓↓VAT1L, ↑↑VWF,  
↓ZNF12, ↓↓ZNF879, ↓ZSCAN29

|        |                             |                             |    |                                                                                                                                                                                                                                                                                                                                                                                                                                                                                                                                                                                                                                                                                                                                                                                                                           |
|--------|-----------------------------|-----------------------------|----|---------------------------------------------------------------------------------------------------------------------------------------------------------------------------------------------------------------------------------------------------------------------------------------------------------------------------------------------------------------------------------------------------------------------------------------------------------------------------------------------------------------------------------------------------------------------------------------------------------------------------------------------------------------------------------------------------------------------------------------------------------------------------------------------------------------------------|
| Cancer | breast or colorectal cancer | breast or colorectal cancer | 85 | $2.96 \times 10^{-6}$<br>↓↓ABCA8, ↑ACPP, ↓↓ACTN2, ↑↑ADAMTS1, ↑↑AKR1C1/AKR1C2, ↑↑ALCAM, ↓ALG9, ↓↓ANGPT2, ↑↑ANK3, ↑↑ANKRD28, ↑↑ANXA4, ↓ARV1, ↓ASAP1, ↓BCAT1, ↑↑BMPR1B, ↓CAV1, ↓↓CBWD3/CBWD6, ↓CES1, ↓CHST7, ↓CKLF, ↓↓COL12A1, ↑↑COL14A1, ↑COL4A2, ↓↓COX4I1, ↑↑CPEB4, ↓↓CRIP1, ↓↓CYP19A1, ↑CYP2B6, ↓↓DAPK1, ↓↓DCLK1, ↑↑DCN, ↓↓DDIT4, ↑↑DST, ↓EGLN1, ↓↓ELAVL2, ↓ETAA1, ↓FANK1, ↓GGPS1, ↑↑GPR116, ↓↓GUCY1A3, ↓H3F3A/H3F3B, ↓HMCN1, ↑↑KAT6A, ↑↑KCNJ8, ↓↓LHCGR, ↑↑MAP4K4, ↓↓MCC, ↓mir-210, ↓↓MMP1, ↓↓MT-ND2, ↓↓MT-ND4L, ↑MT1X, ↓NIN, ↑↑NOV, ↓↓OLFM4, ↓PARP11, ↓↓PDZRN3, ↓↓PELP1, ↓↓PID1, ↓PROSC, ↑↑RGS4, ↑↑RHOQ, ↓↓RHPN2, ↓↓RIF1, ↓RIMS2, ↓↓RIN2, ↓↓RYP2, ↑SHC4, ↓SKP2, ↓SLC12A2, ↓↓SLC26A2, ↓↓SLC2A1, ↓SMAD7, ↓STYXL1, ↑↑SYNE1, ↓TES, ↑↑TFPI, ↓↓TNFAIP6, ↑TOX, ↓↓TRIM9, ↓TYMS, ↓↓UGT1A9 (includes others), ↓↓UST, ↓VEGFC, ↑↑VWF |
| Cancer | head and neck tumor         | head and neck tumor         | 28 | $6.98 \times 10^{-6}$<br>↓↓ABCA8, ↑↑ADAMTS1, ↑↑ALCAM, ↓↓ANGPT2, ↓BHMT, ↑↑BMPR1B, ↓CAV1, ↓CDCA7L, ↑COL4A2, ↓↓DAPK1, ↑↑DCN, ↑↑FOXO1, ↓H3F3A/H3F3B, ↓HMCN1, ↑↑KAT6A, ↓↓KCNAB1, ↑↑MAP4K4, ↓↓MMP1, ↓↓MT-ND2, ↓POSTN, ↓↓RIN2, ↓SLC12A2, ↓↓SLC2A1, ↓SMAD7, ↑↑SYNE1, ↑↑TFPI, ↓TYMS, ↓VEGFC                                                                                                                                                                                                                                                                                                                                                                                                                                                                                                                                        |

|                                        |                              |                              |    |                       |                                                                                                                                                                                                                                                                                                                                                                                                                                                                                                                                                                                                                                                                                |
|----------------------------------------|------------------------------|------------------------------|----|-----------------------|--------------------------------------------------------------------------------------------------------------------------------------------------------------------------------------------------------------------------------------------------------------------------------------------------------------------------------------------------------------------------------------------------------------------------------------------------------------------------------------------------------------------------------------------------------------------------------------------------------------------------------------------------------------------------------|
| Cancer                                 | head and neck cancer         | head and neck cancer         | 25 | 1.09×10 <sup>-5</sup> | ↓↓ABCA8, ↑↑ADAMTS1, ↑↑ALCAM, ↓↓ANGPT2, ↓BHMT, ↑↑BMPR1B, ↓CAV1, ↓CDCA7L, ↑COL4A2, ↑↑DCN, ↓H3F3A/H3F3B, ↓HMCN1, ↑↑KAT6A, ↓↓KCNAB1, ↑↑MAP4K4, ↓↓MMP1, ↓↓MT-ND2, ↓POSTN, ↓↓RIN2, ↓SLC12A2, ↓↓SLC2A1, ↓SMAD7, ↑↑SYNE1, ↓TYMS, ↓VEGFC                                                                                                                                                                                                                                                                                                                                                                                                                                                |
| Connective Tissue Disorders            | Dupuytren contracture        | Dupuytren contracture        | 7  | 1.28×10 <sup>-5</sup> | ↑↑ADAMTS1, ↓↓COL12A1, ↑↑COL14A1, ↑COL4A2, ↑↑COL4A3, ↓↓COL5A1, ↓↓MMP1                                                                                                                                                                                                                                                                                                                                                                                                                                                                                                                                                                                                           |
| Dermatological Diseases and Conditions | burn                         | burn                         | 6  | 3.66×10 <sup>-5</sup> | ↓↓COL12A1, ↑↑COL14A1, ↑COL4A2, ↑↑COL4A3, ↓↓COL5A1, ↓HMGB1                                                                                                                                                                                                                                                                                                                                                                                                                                                                                                                                                                                                                      |
| Cancer   Gastrointestinal Disease      | metastatic colorectal cancer | metastatic colorectal cancer | 10 | 4.17×10 <sup>-5</sup> | ↑↑AKR1C1/AKR1C2, ↑↑ANK3, ↓CAV1, ↑COL4A2, ↓↓PDZRN3, ↑↑RGS4, ↑↑TFPI, ↓↓TRIM9, ↓TYMS, ↓VEGFC                                                                                                                                                                                                                                                                                                                                                                                                                                                                                                                                                                                      |
| Cancer   Gastrointestinal Disease      | gastrointestinal tumor       | gastrointestinal tumor       | 73 | 4.94×10 <sup>-5</sup> | ↑ACPP, ↑↑ADAMTS1, ↑↑AKR1C1/AKR1C2, ↑↑ALCAM, ↓ALG9, ↓↓ANGPT2, ↑↑ANK3, ↑↑ANKRD28, ↑↑ANXA4, ↓ARV1, ↓ASAP1, ↓BHMT, ↑↑BMPR1B, ↓↓BNIP3, ↓CANX, ↓CAV1, ↓↓CBWD3/CBWD6, ↓CKLF, ↓↓COL12A1, ↑↑COL14A1, ↑COL4A2, ↑↑CPEB4, ↓↓CRIP1, ↓↓DAPK1, ↓DCAF13, ↓↓DCLK1, ↑↑DCN, ↑↑DST, ↓↓ELAVL2, ↓ETAA1, ↓FANK1, ↑↑GPR116, ↓↓GUCY1A3, ↓HMCN1, ↑↑KAT6A, ↑↑KCNJ8, ↓↓LHCGR, ↑↑MAP4K4, ↓↓MCC, ↓↓MT-ND4L, ↑MT1X, ↓NIN, ↑↑NOV, ↓↓OLFM4, ↓PARP11, ↓↓PDZRN3, ↓↓PELP1, ↓POSTN, ↓↓PTGIS, ↑↑RGS4, ↑↑RHOQ, ↓↓RHPN2, ↓↓RIF1, ↓RIMS2, ↓↓RIN2, ↓↓RYP2, ↑SHC4, ↓SKP2, ↓SLC12A2, ↓↓SLC26A2, ↓↓SLC2A1, ↓SMAD7, ↑↑SYNE1, ↓TES, ↑↑TFPI, ↓↓TNFAIP6, ↑TOX, ↓↓TRIM9, ↓TYMS, ↓↓UGT1A9 (includes others), ↓↓UST, ↓VEGFC, ↑↑VWF |



|                                   |               |                                          |    |                       |                                                                                                                                                                                                                                                                                                                                                                                                                                                                                                                                                                                                                                                                              |
|-----------------------------------|---------------|------------------------------------------|----|-----------------------|------------------------------------------------------------------------------------------------------------------------------------------------------------------------------------------------------------------------------------------------------------------------------------------------------------------------------------------------------------------------------------------------------------------------------------------------------------------------------------------------------------------------------------------------------------------------------------------------------------------------------------------------------------------------------|
| Cancer   Gastrointestinal Disease | neoplasia     | Gastrointestinal Tract Cancer and Tumors | 72 | 7.88×10 <sup>-5</sup> | <p>↑ACPP, ↑↑ADAMTS1, ↑↑AKR1C1/AKR1C2, ↑↑ALCAM, ↓ALG9, ↓↓ANGPT2, ↑↑ANK3, ↑↑ANKRD28, ↑↑ANXA4, ↓ARV1, ↓ASAP1, ↓BHMT, ↑↑BMPR1B, ↓↓BNIP3, ↓CANX, ↓CAV1, ↓↓CBWD3/CBWD6, ↓CKLF, ↓↓COL12A1, ↑↑COL14A1, ↑COL4A2, ↑↑CPEB4, ↓↓CRIP1, ↓↓DAPK1, ↓DCAF13, ↓↓DCLK1, ↑↑DCN, ↑↑DST, ↓↓ELAVL2, ↓ETAA1, ↓FANK1, ↑↑GPR116, ↓↓GUCY1A3, ↓HMCN1, ↑↑KAT6A, ↑↑KCNJ8, ↓↓LHCGR, ↑↑MAP4K4, ↓↓MCC, ↓↓MT-ND4L, ↑MT1X, ↓NIN, ↑↑NOV, ↓↓OLFM4, ↓PARP11, ↓↓PDZRN3, ↓↓PELP1, ↓POSTN, ↑↑RGS4, ↑↑RHOQ, ↓↓RHPN2, ↓↓RIF1, ↓RIMS2, ↓↓RIN2, ↓↓RYR2, ↑SHC4, ↓SKP2, ↓SLC12A2, ↓↓SLC26A2, ↓↓SLC2A1, ↓SMAD7, ↑↑SYNE1, ↓TES, ↑↑TFPI, ↓↓TNFAIP6, ↑TOX, ↓↓TRIM9, ↓TYMS, ↓↓UGT1A9 (includes others), ↓↓UST, ↓VEGFC, ↑↑VWF</p> |
| Tissue Morphology                 | contraction   | contraction of cardiovascular tissue     | 6  | 8.12×10 <sup>-5</sup> | <p>↓↓↓ANGPT2, ↓↓CTSV, ↓MAP2K6, ↓↓MMP1, ↓↓RYR2, ↓SMAD7</p>                                                                                                                                                                                                                                                                                                                                                                                                                                                                                                                                                                                                                    |
| Cancer                            | pelvic cancer | pelvic cancer                            | 34 | 8.81×10 <sup>-5</sup> | <p>↓↓ABCA8, ↑↑ALCAM, ↓↓ANGPT2, ↑↑BMPR1B, ↓CAV1, ↑↑COL14A1, ↓↓CTSV, ↓↓CYP19A1, ↑↑DST, ↓↓DYNC1I1, ↑↑FAM13A, ↑↑FOXO1, ↓GGPS1, ↓↓GUCY1A3, ↓↓JAKMIP2, ↓KCTD1, ↓↓LHCGR, ↓MAP2K6, ↓mir-210, ↓↓MMP1, ↓↓PDZRN3, ↓POSTN, ↓↓PTGIS, ↓RNF144A, ↓SKP2, ↓↓SLC2A1, ↑↑SND1, ↓STON1, ↓TES, ↑↑TFPI, ↓TYMS, ↓VEGFC, ↓ZEB1, ↓ZNF350</p>                                                                                                                                                                                                                                                                                                                                                           |

Cancer | Gastrointestinal  
Disease

gastrointestinal  
tract cancer

gastrointestinal  
tract cancer

71

$1.36 \times 10^{-4}$  ↑ACPP, ↑↑ADAMTS1,  
↑↑AKR1C1/AKR1C2, ↑↑ALCAM, ↓ALG9,  
↓↓ANGPT2, ↑↑ANK3, ↑↑ANKRD28,  
↑↑ANXA4, ↓ARV1, ↓ASAP1, ↓BHMT,  
↑↑BMPR1B, ↓↓BNIP3, ↓CANX, ↓CAV1,  
↓↓CBWD3/CBWD6, ↓CKLF, ↓↓COL12A1,  
↑↑COL14A1, ↑COL4A2, ↑↑CPEB4,  
↓↓CRIP1, ↓↓DAPK1, ↓DCAF13, ↓↓DCLK1,  
↑↑DCN, ↑↑DST, ↓↓ELAVL2, ↓ETAA1,  
↓FANK1, ↑↑GPR116, ↓↓GUCY1A3,  
↓HMCN1, ↑↑KAT6A, ↑↑KCNJ8, ↓↓LHCGR,  
↑↑MAP4K4, ↓↓MCC, ↓↓MT-ND4L, ↑MT1X,  
↓NIN, ↑↑NOV, ↓↓OLFM4, ↓PARP11,  
↓↓PDZRN3, ↓↓PELP1, ↓POSTN, ↑↑RGS4,  
↑↑RHOQ, ↓↓RHPN2, ↓↓RIF1, ↓RIMS2,  
↓↓RIN2, ↓↓RYR2, ↑SHC4, ↓SKP2,  
↓SLC12A2, ↓↓SLC26A2, ↓↓SLC2A1,  
↓SMAD7, ↑↑SYNE1, ↑↑TFPI, ↓↓TNFAIP6,  
↑TOX, ↓↓TRIM9, ↓TYMS, ↓↓UGT1A9  
(includes others), ↓↓UST, ↓VEGFC,  
↑↑VWF

|                                                                                                                                                                                                                                     |                  |                         |    |                       |                                                                                                                                                                                                                                                                                                                                                                                                                                                                                                                                                                                                                                          |
|-------------------------------------------------------------------------------------------------------------------------------------------------------------------------------------------------------------------------------------|------------------|-------------------------|----|-----------------------|------------------------------------------------------------------------------------------------------------------------------------------------------------------------------------------------------------------------------------------------------------------------------------------------------------------------------------------------------------------------------------------------------------------------------------------------------------------------------------------------------------------------------------------------------------------------------------------------------------------------------------------|
| Cancer   Gastrointestinal Disease                                                                                                                                                                                                   | colorectal tumor | colorectal tumor        | 67 | 1.66×10 <sup>-4</sup> | <p>↑ACPP, ↑↑ADAMTS1, ↑↑AKR1C1/AKR1C2, ↑↑ALCAM, ↓ALG9, ↓↓ANGPT2, ↑↑ANK3, ↑↑ANKRD28, ↑↑ANXA4, ↓ARV1, ↓ASAP1, ↑↑BMPR1B, ↓CAV1, ↓↓CBWD3/CBWD6, ↓CKLF, ↓↓COL12A1, ↑↑COL14A1, ↑COL4A2, ↑↑CPEB4, ↓↓CRIP1, ↓↓DAPK1, ↓↓DCLK1, ↑↑DCN, ↑↑DST, ↓↓ELAVL2, ↓ETAA1, ↓FANK1, ↑↑GPR116, ↓↓GUCY1A3, ↓HMCN1, ↑↑KAT6A, ↑↑KCNJ8, ↓↓LHCGR, ↑↑MAP4K4, ↓↓MCC, ↓↓MT-ND4L, ↑MT1X, ↓NIN, ↑↑NOV, ↓↓OLFM4, ↓PARP11, ↓↓PDZRN3, ↓↓PELP1, ↓↓PTGIS, ↑↑RGS4, ↑↑RHOQ, ↓↓RHPN2, ↓↓RIF1, ↓RIMS2, ↓↓RIN2, ↓↓RYSR2, ↑SHC4, ↓SKP2, ↓SLC12A2, ↓↓SLC26A2, ↓↓SLC2A1, ↓SMAD7, ↑↑SYNE1, ↑↑TFPI, ↓↓TNFAIP6, ↑TOX, ↓↓TRIM9, ↓TYMS, ↓↓UGT1A9 (includes others), ↓↓UST, ↓VEGFC, ↑↑VWF</p> |
| Cancer   Organismal Injury and Abnormalities   Reproductive System Disease                                                                                                                                                          | uterine cancer   | uterine cancer          | 18 | 2.10×10 <sup>-4</sup> | <p>↓↓ABCA8, ↓CAV1, ↑↑COL14A1, ↓↓CTSV, ↓↓CYP19A1, ↑↑DST, ↓↓DYNC111, ↓↓GUCY1A3, ↓↓LHCGR, ↓mir-210, ↓↓PDZRN3, ↓↓PTGIS, ↓STON1, ↑↑TFPI, ↓TYMS, ↓VEGFC, ↓ZEB1, ↓ZNF350</p>                                                                                                                                                                                                                                                                                                                                                                                                                                                                    |
| Connective Tissue Development and Function   Embryonic Development   Organ Development   Organ Morphology   Organismal Development   Skeletal and Muscular System Development and Function   Tissue Development   Tissue Morphology | morphology       | morphology of trabecula | 3  | 2.27×10 <sup>-4</sup> | <p>↓CAV1, ↓↓CYP19A1, ↓↓RYSR2</p>                                                                                                                                                                                                                                                                                                                                                                                                                                                                                                                                                                                                         |

|                                                                                                                                               |                   |                               |    |                       |                                                                                                                                                                                                                                                                                                                                                                                                                                                                                                                                                                                                                         |
|-----------------------------------------------------------------------------------------------------------------------------------------------|-------------------|-------------------------------|----|-----------------------|-------------------------------------------------------------------------------------------------------------------------------------------------------------------------------------------------------------------------------------------------------------------------------------------------------------------------------------------------------------------------------------------------------------------------------------------------------------------------------------------------------------------------------------------------------------------------------------------------------------------------|
| Dermatological Diseases and Conditions   Gastrointestinal Disease   Organismal Injury and Abnormalities                                       | ulcer             | ulcer                         | 6  | 2.42×10 <sup>-4</sup> | ↓↓COL12A1, ↑↑COL14A1, ↑COL4A2, ↑↑COL4A3, ↓↓COL5A1, ↑↑TFPI                                                                                                                                                                                                                                                                                                                                                                                                                                                                                                                                                               |
| Cancer   Gastrointestinal Disease                                                                                                             | colorectal cancer | colorectal cancer             | 66 | 2.67×10 <sup>-4</sup> | ↑ACPP, ↑↑ADAMTS1, ↑↑AKR1C1/AKR1C2, ↑↑ALCAM, ↓ALG9, ↓↓ANGPT2, ↑↑ANK3, ↑↑ANKRD28, ↑↑ANXA4, ↓ARV1, ↓ASAP1, ↑↑BMPR1B, ↓CAV1, ↓↓CBWD3/CBWD6, ↓CKLF, ↓↓COL12A1, ↑↑COL14A1, ↑COL4A2, ↑↑CPEB4, ↓↓CRIP1, ↓↓DAPK1, ↓↓DCLK1, ↑↑DCN, ↑↑DST, ↓↓ELAVL2, ↓ETAA1, ↓FANK1, ↑↑GPR116, ↓↓GUCY1A3, ↓HMCN1, ↑↑KAT6A, ↑↑KCNJ8, ↓↓LHCGR, ↑↑MAP4K4, ↓↓MCC, ↓↓MT-ND4L, ↑MT1X, ↓NIN, ↑↑NOV, ↓↓OLFM4, ↓PARP11, ↓↓PDZRN3, ↓↓PELP1, ↑↑RGS4, ↑↑RHOQ, ↓↓RHPN2, ↓↓RIF1, ↓RIMS2, ↓↓RIN2, ↓↓RYR2, ↑SHC4, ↓SKP2, ↓SLC12A2, ↓↓SLC26A2, ↓↓SLC2A1, ↓SMAD7, ↑↑SYNE1, ↑↑TFPI, ↓↓TNFAIP6, ↑TOX, ↓↓TRIM9, ↓TYMS, ↓↓UGT1A9 (includes others), ↓↓UST, ↓VEGFC, ↑↑VWF |
| Reproductive System Development and Function   Tissue Morphology                                                                              | quantity          | quantity of spermatids        | 3  | 2.93×10 <sup>-4</sup> | ↓↓CYP19A1, ↓↓LHCGR, ↓SLC12A2                                                                                                                                                                                                                                                                                                                                                                                                                                                                                                                                                                                            |
| Cardiovascular System Development and Function   Organ Morphology   Skeletal and Muscular System Development and Function   Tissue Morphology | contraction       | contraction of cardiac muscle | 5  | 3.11×10 <sup>-4</sup> | ↓↓CTSV, ↓MAP2K6, ↓↓MMP1, ↓↓RYR2, ↓SMAD7                                                                                                                                                                                                                                                                                                                                                                                                                                                                                                                                                                                 |
| Cellular Assembly and Organization                                                                                                            | alignment         | alignment of filaments        | 2  | 3.20×10 <sup>-4</sup> | ↓CAV1, ↑↑DST                                                                                                                                                                                                                                                                                                                                                                                                                                                                                                                                                                                                            |

|                                                                                                                                               |                     |                                             |   |                                                      |
|-----------------------------------------------------------------------------------------------------------------------------------------------|---------------------|---------------------------------------------|---|------------------------------------------------------|
| Lymphoid Tissue Structure and Development                                                                                                     | area                | area of lymphatic system component          | 2 | 3.20×10 <sup>-4</sup> ↑↑TNFRSF11A, ↓VEGFC            |
| Cardiovascular System Development and Function   Organ Morphology   Skeletal and Muscular System Development and Function   Tissue Morphology | contraction         | contraction of myocardium                   | 2 | 3.20×10 <sup>-4</sup> ↓↓CTSV, ↓↓MMP1                 |
| Respiratory System Development and Function                                                                                                   | elastance           | elastance of lung                           | 2 | 3.20×10 <sup>-4</sup> ↓CAV1, ↓↓TNFAIP6               |
| Cancer   Cellular Development   Cellular Growth and Proliferation   Organ Development   Reproductive System Disease   Respiratory Disease     | lung metastasis     | lung metastasis of breast cancer cell lines | 2 | 3.20×10 <sup>-4</sup> ↑↑ADAMTS1, ↑↑SND1              |
| Cell Morphology   Cellular Function and Maintenance                                                                                           | permeability        | permeability of podocytes                   | 2 | 3.20×10 <sup>-4</sup> ↓↓ANGPT2, ↓ZEB1                |
| Cardiovascular System Development and Function   Cell-To-Cell Signaling and Interaction   Tissue Development                                  | adhesion            | adhesion of endothelial cell lines          | 4 | 3.24×10 <sup>-4</sup> ↓↓ANGPT2, ↓CAV1, ↑↑DCN, ↓VEGFC |
| Organ Morphology   Organismal Development   Reproductive System Development and Function                                                      | abnormal morphology | abnormal morphology of endometrium          | 3 | 3.70×10 <sup>-4</sup> ↑↑BMP1B, ↓↓CYP19A1, ↓↓LHCGR    |
| Carbohydrate Metabolism   Cellular Function and Maintenance                                                                                   | glycolysis          | glycolysis of tumor cell lines              | 3 | 3.70×10 <sup>-4</sup> ↓CAV1, ↓mir-210, ↓SKP2         |
| Cancer   Cellular Development   Cellular Growth and Proliferation   Respiratory Disease                                                       | metastasis          | metastasis of lung cancer cell lines        | 3 | 3.70×10 <sup>-4</sup> ↓CAV1, ↑COL4A2, ↓↓DAPK1        |

|                                                                                        |                             |                                             |    |                       |                                                                                                                                                                                                                                                                                                       |
|----------------------------------------------------------------------------------------|-----------------------------|---------------------------------------------|----|-----------------------|-------------------------------------------------------------------------------------------------------------------------------------------------------------------------------------------------------------------------------------------------------------------------------------------------------|
| Cancer   Organismal Injury and Abnormalities   Reproductive System Disease             | breast cancer               | breast cancer                               | 33 | 4.31×10 <sup>-4</sup> | ↓↓ABCA8, ↑ACPP, ↓↓ACTN2, ↑↑ADAMTS1, ↑↑AKR1C1/AKR1C2, ↓BCAT1, ↓CAV1, ↓CES1, ↓CHST7, ↓↓COL12A1, ↓↓COX4I1, ↓↓CYP19A1, ↑CYP2B6, ↑↑DCN, ↓↓DDIT4, ↓EGLN1, ↓GGPS1, ↓H3F3A/H3F3B, ↓↓LHCGR, ↓mir-210, ↓↓MMP1, ↓↓MT-ND2, ↑MT1X, ↓↓PELP1, ↓↓PID1, ↓PROSC, ↓↓RHPN2, ↓SKP2, ↓STYXL1, ↑↑SYNE1, ↓TES, ↓↓TRIM9, ↓TYMS |
| Cardiovascular Disease   Organismal Injury and Abnormalities                           | failure                     | failure of heart                            | 10 | 4.42×10 <sup>-4</sup> | ↓CAV1, ↑↑FOXO1, ↓↓GUCY1A3, ↓GUCY1B3, ↓HMGB1, ↑↑HPGD, ↓mir-210, ↓PDE7B, ↓↓RYR2, ↑↑VWF                                                                                                                                                                                                                  |
| Skeletal and Muscular System Development and Function   Tissue Development             | development                 | cartilage development                       | 7  | 4.85×10 <sup>-4</sup> | ↑↑BMPR1B, ↑↑BTC, ↓CHST7, ↓↓COL12A1, ↓HMGB1, ↑↑NOV, ↓ZEB1                                                                                                                                                                                                                                              |
| Organismal Development                                                                 | abnormal morphology         | abnormal morphology of body cavity          | 27 | 5.11×10 <sup>-4</sup> | ↑↑ADAMTS1, ↓BHMT, ↑↑BMPR1B, ↑↑BTC, ↓CAV1, ↓CAV2, ↓↓CYP19A1, ↑↑DCN, ↓EGLN1, ↓ELK3, ↓GLCE, ↑↑GPR116, ↓GUCY1B3, ↑↑HPGD, ↑↑KAT6A, ↓↓LHCGR, ↑↑NOV, ↓POSTN, ↓↓RYR2, ↓SKP2, ↑↑SLC20A1, ↓SMAD7, ↑↑SYNE1, ↓TES, ↑↑TNFRSF11A, ↑TOX, ↓ZEB1                                                                       |
| Cancer   Organismal Injury and Abnormalities   Reproductive System Disease             | female genital tract cancer | female genital tract cancer                 | 23 | 5.47×10 <sup>-4</sup> | ↓↓ABCA8, ↑↑ALCAM, ↓↓ANGPT2, ↓CAV1, ↑↑COL14A1, ↓↓CTSV, ↓↓CYP19A1, ↑↑DST, ↓↓DYNC111, ↓↓GUCY1A3, ↓↓LHCGR, ↓mir-210, ↓↓MMP1, ↓↓PDZRN3, ↓POSTN, ↓↓PTGIS, ↓STON1, ↓TES, ↑↑TFPI, ↓TYMS, ↓VEGFC, ↓ZEB1, ↓ZNF350                                                                                               |
| Digestive System Development and Function   Organismal Development   Tissue Morphology | abnormal morphology         | abnormal morphology of periodontal ligament | 2  | 6.36×10 <sup>-4</sup> | ↑↑DCN, ↓POSTN                                                                                                                                                                                                                                                                                         |

|                                                                                                                                                                                                                 |                          |                                    |    |                       |                                                                                                                                                                                                                                                                                                                                  |
|-----------------------------------------------------------------------------------------------------------------------------------------------------------------------------------------------------------------|--------------------------|------------------------------------|----|-----------------------|----------------------------------------------------------------------------------------------------------------------------------------------------------------------------------------------------------------------------------------------------------------------------------------------------------------------------------|
| Developmental Disorder   Organismal Injury and Abnormalities   Reproductive System Disease                                                                                                                      | hypertrophy              | hypertrophy of Leydig cells        | 2  | 6.36×10 <sup>-4</sup> | ↓↓CYP19A1, ↓↓LHCGR                                                                                                                                                                                                                                                                                                               |
| Lipid Metabolism   Small Molecule Biochemistry                                                                                                                                                                  | modification             | modification of prostaglandin      | 3  | 6.75×10 <sup>-4</sup> | ↑CYP2B6, ↑↑HPGD, ↓↓PTGIS                                                                                                                                                                                                                                                                                                         |
| Cardiovascular Disease                                                                                                                                                                                          | hypertension             | Hypertension                       | 19 | 7.36×10 <sup>-4</sup> | ↓↓ANGPT2, ↓BCAT1, ↑↑BMPR1B, ↓CAV1, ↓↓COL12A1, ↓↓CYP19A1, ↑↑GPR116, ↓↓GUCY1A3, ↓GUCY1B3, ↓↓LHCGR, ↓PDE7B, ↓↓PTGIS, ↑RBFOX1, ↓↓RFTN2, ↑↑RORA, ↓SLC12A2, ↓TMX1, ↓VEGFC, ↑↑VWF                                                                                                                                                       |
| Cancer                                                                                                                                                                                                          | breast or ovarian cancer | breast or ovarian cancer           | 36 | 8.98×10 <sup>-4</sup> | ↓↓ABCA8, ↑ACPP, ↓↓ACTN2, ↑↑ADAMTS1, ↑↑AKR1C1/AKR1C2, ↑↑ALCAM, ↓↓ANGPT2, ↓BCAT1, ↓CAV1, ↓CES1, ↓CHST7, ↓↓COL12A1, ↓↓COX4I1, ↓↓CYP19A1, ↑CYP2B6, ↑↑DCN, ↓↓DDIT4, ↓EGLN1, ↓GGPS1, ↓H3F3A/H3F3B, ↓↓LHCGR, ↓mir-210, ↓↓MMP1, ↓↓MT-ND2, ↑MT1X, ↓↓PELP1, ↓↓PID1, ↓POSTN, ↓PROSC, ↓↓RHPN2, ↓SKP2, ↓STYXL1, ↑↑SYNE1, ↓TES, ↓↓TRIM9, ↓TYMS |
| Connective Tissue Development and Function   Embryonic Development   Organ Development   Organ Morphology   Organismal Development   Skeletal and Muscular System Development and Function   Tissue Development | abnormal morphology      | abnormal morphology of carpal bone | 3  | 9.48×10 <sup>-4</sup> | ↑↑BMPR1B, ↓LMBR1, ↑↑NOV                                                                                                                                                                                                                                                                                                          |
| Hair and Skin Development and Function                                                                                                                                                                          | tensile strength         | tensile strength of skin           | 3  | 9.48×10 <sup>-4</sup> | ↑↑COL14A1, ↓↓COL5A1, ↑↑DCN                                                                                                                                                                                                                                                                                                       |
| Cell Death and Survival   Embryonic Development                                                                                                                                                                 | apoptosis                | apoptosis of neural tube cells     | 2  | 1.05×10 <sup>-3</sup> | ↑↑BMPR1B, ↑↑FOXO1                                                                                                                                                                                                                                                                                                                |

|                                                                                            |                                      |                                            |    |                                                                                                                                                                                                        |
|--------------------------------------------------------------------------------------------|--------------------------------------|--------------------------------------------|----|--------------------------------------------------------------------------------------------------------------------------------------------------------------------------------------------------------|
| Cell Morphology   Cellular Compromise                                                      | binucleation                         | binucleation of cervical cancer cell lines | 2  | 1.05×10 <sup>-3</sup> ↓SEPT11, ↑SEPT6                                                                                                                                                                  |
| Cellular Assembly and Organization   Tissue Development                                    | formation                            | formation of collagen fibrils              | 2  | 1.05×10 <sup>-3</sup> ↓↓COL5A1, ↓POSTN                                                                                                                                                                 |
| Lipid Metabolism   Small Molecule Biochemistry                                             | synthesis                            | synthesis of oleic acid                    | 2  | 1.05×10 <sup>-3</sup> ↓CAV1, ↓CAV2                                                                                                                                                                     |
| Organ Morphology   Respiratory Disease   Respiratory System Development and Function       | thickness                            | thickness of interalveolar septa           | 2  | 1.05×10 <sup>-3</sup> ↓CAV1, ↓CAV2                                                                                                                                                                     |
| Cell Morphology   Tissue Development                                                       | tubulation                           | tubulation of epithelial cells             | 2  | 1.05×10 <sup>-3</sup> ↓MAP2K6, ↑↑RGS4                                                                                                                                                                  |
| Developmental Disorder   Organismal Injury and Abnormalities   Reproductive System Disease | congenital anomaly of genital system | congenital anomaly of genital system       | 4  | 1.11×10 <sup>-3</sup> ↑↑AKR1C1/AKR1C2, ↑↑BMPR1B, ↓↓CYP19A1, ↓↓LHCGR                                                                                                                                    |
| Cancer   Cellular Development   Cellular Growth and Proliferation                          | metastasis                           | metastasis of carcinoma cell lines         | 3  | 1.11×10 <sup>-3</sup> ↓CAV1, ↑COL4A2, ↓↓DAPK1                                                                                                                                                          |
| Cancer                                                                                     | uterine tumor                        | uterine tumor                              | 20 | 1.38×10 <sup>-3</sup> ↓↓ABCA8, ↓CAV1, ↑↑COL14A1, ↓↓CTSV, ↓↓CYP19A1, ↑↑DST, ↓↓DYNC1I1, ↓↓GUCY1A3, ↓↓LHCGR, ↓mir-210, ↓↓PDZRN3, ↓↓PTGIS, ↑↑RORA, ↓↓SORBS2, ↓STON1, ↑↑TFPI, ↓TYMS, ↓VEGFC, ↓ZEB1, ↓ZNF350 |
| Hematological System Development and Function                                              | circulation                          | circulation of blood                       | 5  | 1.39×10 <sup>-3</sup> ↑↑COL4A3, ↓↓GUCY1A3, ↓GUCY1B3, ↓SMAD7, ↑↑TFPI                                                                                                                                    |
| Cancer   Neurological Disease                                                              | central nervous system tumor         | central nervous system tumor               | 16 | 1.40×10 <sup>-3</sup> ↓↓ABCA8, ↑↑AKR1C1/AKR1C2, ↑↑ALCAM, ↓↓ANGPT2, ↓CAV1, ↓CDCA7L, ↓CDK8, ↑COL4A2, ↑↑FOXO1, ↓H3F3A/H3F3B, ↓↓KCNAB1, ↑↑MAP4K4, ↓↓RHPN2, ↓↓RZR2, ↓SLC12A2, ↑↑TFPI                        |



|                                                                                          |                     |                                        |    |                       |                                                                                                                                 |
|------------------------------------------------------------------------------------------|---------------------|----------------------------------------|----|-----------------------|---------------------------------------------------------------------------------------------------------------------------------|
| Cancer   Organismal Injury and Abnormalities   Reproductive System Disease               | endometrial cancer  | endometrial cancer                     | 13 | 1.41×10 <sup>-3</sup> | ↓↓ABCA8, ↓CAV1, ↑↑COL14A1, ↓↓CYP19A1, ↑↑DST, ↓↓DYNC1I1, ↓↓GUCY1A3, ↓↓LHCGR, ↓mir-210, ↓↓PDZRN3, ↓↓PTGIS, ↓STON1, ↓ZEB1          |
| Tissue Development                                                                       | development         | development of connective tissue       | 10 | 1.44×10 <sup>-3</sup> | ↑↑ADAMTS1, ↑↑BMPR1B, ↑↑BTC, ↓CAV1, ↓CHST7, ↓↓COL12A1, ↓HMGB1, ↑↑NOV, ↑↑TNFRSF11A, ↓ZEB1                                         |
| Lipid Metabolism   Molecular Transport   Small Molecule Biochemistry                     | accumulation        | accumulation of triacylglycerol        | 5  | 1.47×10 <sup>-3</sup> | ↑↑FOXO1, ↓INSIG2, ↓PON2, ↑↑RGS4, ↓↓SGMS2                                                                                        |
| Cancer   Neurological Disease                                                            | brain tumor         | brain tumor                            | 11 | 1.47×10 <sup>-3</sup> | ↓↓ABCA8, ↑↑ALCAM, ↓↓ANGPT2, ↓CAV1, ↓CDCA7L, ↑COL4A2, ↓H3F3A/H3F3B, ↓↓KCNAB1, ↑↑MAP4K4, ↓SLC12A2, ↑↑TFPI                         |
| Cancer                                                                                   | hyperplasia         | hyperplasia of epithelial tissue       | 4  | 1.54×10 <sup>-3</sup> | ↑↑BTC, ↓CAV1, ↓↓CYP19A1, ↑↑DCN                                                                                                  |
| Cancer   Neurological Disease                                                            | astrocytoma         | astrocytoma                            | 13 | 1.55×10 <sup>-3</sup> | ↓↓ABCA8, ↑↑AKR1C1/AKR1C2, ↑↑ALCAM, ↓↓ANGPT2, ↓CAV1, ↓CDK8, ↑COL4A2, ↓H3F3A/H3F3B, ↓↓KCNAB1, ↑↑MAP4K4, ↓↓RHPN2, ↓↓RZR2, ↓SLC12A2 |
| Organ Morphology   Organismal Development   Reproductive System Development and Function | abnormal morphology | abnormal morphology of thin myometrium | 2  | 1.57×10 <sup>-3</sup> | ↓↓CYP19A1, ↓↓LHCGR                                                                                                              |
| Cardiovascular Disease                                                                   | cardiomyopathy      | cardiomyopathy of heart ventricle      | 2  | 1.57×10 <sup>-3</sup> | ↓CAV1, ↑↑NOV                                                                                                                    |
| Cancer                                                                                   | entrance            | entrance of brain cancer cell lines    | 2  | 1.57×10 <sup>-3</sup> | ↓CAV1, ↓CAV2                                                                                                                    |
| Dermatological Diseases and Conditions   Inflammatory Disease   Inflammatory Response    | folliculitis        | folliculitis                           | 2  | 1.57×10 <sup>-3</sup> | ↓↓CTSV, ↓↓MMP1                                                                                                                  |

|                                                                                                                                                               |                                 |                                 |    |                       |                                                                                                                                           |
|---------------------------------------------------------------------------------------------------------------------------------------------------------------|---------------------------------|---------------------------------|----|-----------------------|-------------------------------------------------------------------------------------------------------------------------------------------|
| Organ Morphology   Organismal Development   Reproductive System Development and Function                                                                      | lack                            | lack of uterine gland           | 2  | 1.57×10 <sup>-3</sup> | ↑↑BMPR1B, ↓↓LHCGR                                                                                                                         |
| Skeletal and Muscular System Development and Function                                                                                                         | maintenance                     | maintenance of muscle           | 2  | 1.57×10 <sup>-3</sup> | ↓↓BNIP3, ↓↓DDIT4                                                                                                                          |
| Inflammatory Disease   Inflammatory Response   Organismal Injury and Abnormalities   Renal and Urological Disease                                             | tubular nephritis               | tubular nephritis               | 2  | 1.57×10 <sup>-3</sup> | ↑↑COL4A3, ↑↑DCN                                                                                                                           |
| Organismal Injury and Abnormalities   Reproductive System Disease                                                                                             | endometriosis                   | endometriosis                   | 13 | 1.64×10 <sup>-3</sup> | ↓↓ANGPT2, ↑↑ANK3, ↓BCAT1, ↓CAV2, ↓↓CYP19A1, ↑↑DCN, ↑↑FOXO1, ↓GUCY1B3, ↓↓LHCGR, ↓↓MMP1, ↑MT1X, ↓SMAD7, ↓VEGFC                              |
| Cell-To-Cell Signaling and Interaction   Hematological System Development and Function   Immune Cell Trafficking   Inflammatory Response   Tissue Development | adhesion                        | adhesion of monocytes           | 4  | 1.66×10 <sup>-3</sup> | ↓↓ANGPT2, ↑↑FOXO1, ↓HMGB1, ↑↑VWF                                                                                                          |
| Cancer   Neurological Disease                                                                                                                                 | glioma                          | glioma                          | 14 | 1.73×10 <sup>-3</sup> | ↓↓ABCA8, ↑↑AKR1C1/AKR1C2, ↑↑ALCAM, ↓↓ANGPT2, ↓CAV1, ↓CDK8, ↑COL4A2, ↑↑FOXO1, ↓H3F3A/H3F3B, ↓↓KCNAB1, ↑↑MAP4K4, ↓↓RHPN2, ↓↓RYSR2, ↓SLC12A2 |
| Cancer   Organismal Injury and Abnormalities   Reproductive System Disease                                                                                    | uterine serous papillary cancer | uterine serous papillary cancer | 9  | 2.01×10 <sup>-3</sup> | ↓↓ABCA8, ↑↑COL14A1, ↑↑DST, ↓↓DYNC111, ↓↓GUCY1A3, ↓↓PDZRN3, ↓↓PTGIS, ↓STON1, ↓ZEB1                                                         |

|                                                                                                                                                                                                                 |                     |                                                        |    |                       |                                                                                                                           |
|-----------------------------------------------------------------------------------------------------------------------------------------------------------------------------------------------------------------|---------------------|--------------------------------------------------------|----|-----------------------|---------------------------------------------------------------------------------------------------------------------------|
| Connective Tissue Development and Function   Embryonic Development   Organ Development   Organ Morphology   Organismal Development   Skeletal and Muscular System Development and Function   Tissue Development | morphology          | morphology of bone                                     | 14 | 2.04×10 <sup>-3</sup> | ↑↑BMPR1B, ↓CAV1, ↓↓COL12A1, ↓↓CTSV, ↓↓CYP19A1, ↓GLCE, ↑↑KAT6A, ↓LMBR1, ↓NME5, ↑↑NOV, ↓RIMS2, ↓↓RYSR2, ↑↑TFPI, ↑↑TNFRSF11A |
| Connective Tissue Development and Function   Embryonic Development   Organ Development   Organ Morphology   Organismal Development   Skeletal and Muscular System Development and Function   Tissue Development | abnormal morphology | abnormal morphology of compact bone                    | 3  | 2.15×10 <sup>-3</sup> | ↓CAV1, ↓↓COL12A1, ↓↓CYP19A1                                                                                               |
| Lipid Metabolism   Small Molecule Biochemistry                                                                                                                                                                  | conversion          | conversion of eicosanoid                               | 3  | 2.15×10 <sup>-3</sup> | ↑CYP2B6, ↑↑HPGD, ↓↓PTGIS                                                                                                  |
| Organismal Functions                                                                                                                                                                                            | endurance           | endurance                                              | 3  | 2.15×10 <sup>-3</sup> | ↓CAV1, ↓CAV2, ↑↑SYNE1                                                                                                     |
| Auditory and Vestibular System Development and Function   Cell Morphology   Organ Morphology                                                                                                                    | abnormal morphology | abnormal morphology of marginal stria vascularis cells | 2  | 2.18×10 <sup>-3</sup> | ↑↑COL4A3, ↓SLC12A2                                                                                                        |
| Cancer   Organismal Injury and Abnormalities   Reproductive System Disease                                                                                                                                      | hyperplasia         | hyperplasia of lactiferous duct                        | 2  | 2.18×10 <sup>-3</sup> | ↓CAV1, ↓↓CYP19A1                                                                                                          |
| Cellular Assembly and Organization   Cellular Function and Maintenance                                                                                                                                          | organization        | organization of membrane rafts                         | 2  | 2.18×10 <sup>-3</sup> | ↓CAV1, ↓CAV2                                                                                                              |
| Connective Tissue Disorders   Gastrointestinal Disease   Inflammatory Disease   Skeletal and Muscular Disorders                                                                                                 | periodontitis       | periodontitis                                          | 2  | 2.18×10 <sup>-3</sup> | ↓↓MMP1, ↓POSTN                                                                                                            |

|                                                                                                                                                                                               |                     |                                        |    |                                                                                                                                                |
|-----------------------------------------------------------------------------------------------------------------------------------------------------------------------------------------------|---------------------|----------------------------------------|----|------------------------------------------------------------------------------------------------------------------------------------------------|
| Organ Morphology   Organismal Development   Reproductive System Development and Function                                                                                                      | abnormal morphology | abnormal morphology of uterus          | 5  | 2.25×10 <sup>-3</sup> ↑↑ADAMTS1, ↑↑BMP1B, ↓CAV1, ↓↓CYP19A1, ↓↓LHCGR                                                                            |
| Endocrine System Disorders   Gastrointestinal Disease   Inflammatory Disease                                                                                                                  | pancreatitis        | Pancreatitis                           | 6  | 2.40×10 <sup>-3</sup> ↓↓ANGPT2, ↑↑ANXA4, ↓↓CTSV, ↓↓GUCY1A3, ↓GUCY1B3, ↓PDE7B                                                                   |
| Lipid Metabolism   Molecular Transport   Small Molecule Biochemistry                                                                                                                          | abnormal quantity   | abnormal quantity of fatty acid        | 3  | 2.41×10 <sup>-3</sup> ↓CAV1, ↑↑HPGD, ↓↓PTGIS                                                                                                   |
| Embryonic Development   Organ Development   Organismal Development   Renal and Urological System Development and Function   Reproductive System Development and Function   Tissue Development | development         | development of uterus                  | 3  | 2.69×10 <sup>-3</sup> ↑↑ADAMTS1, ↓↓CYP19A1, ↓↓LHCGR                                                                                            |
| Cardiovascular System Development and Function   Cell Death and Survival                                                                                                                      | survival            | survival of vascular endothelial cells | 3  | 2.69×10 <sup>-3</sup> ↓↓ANGPT2, ↑↑BTC, ↑↑FOXO1                                                                                                 |
| Cardiovascular Disease   Hematological Disease                                                                                                                                                | thrombosis          | thrombosis of vein                     | 4  | 2.73×10 <sup>-3</sup> ↓↓ANGPT2, ↑↑TFPI, ↓VEGFC, ↑↑VWF                                                                                          |
| Lipid Metabolism   Small Molecule Biochemistry                                                                                                                                                | metabolism          | metabolism of triacylglycerol          | 5  | 2.86×10 <sup>-3</sup> ↓BHMT, ↓CAV1, ↑↑FOXO1, ↓INSIG2, ↓PON2                                                                                    |
| Skeletal and Muscular Disorders                                                                                                                                                               | myopathy            | myopathy                               | 14 | 2.86×10 <sup>-3</sup> ↓↓ACTN2, ↓CANX, ↑↑FOXO1, ↓HMGB1, ↑↑KCNJ8, ↓mir-210, ↓↓MMP1, ↓↓MT-ND2, ↓↓MT-ND4L, ↑↑NOV, ↓PDE7B, ↓↓RYSR2, ↑↑SYNE1, ↑↑TFPI |
| Carbohydrate Metabolism   Drug Metabolism   Small Molecule Biochemistry                                                                                                                       | binding             | binding of heparan sulfate             | 2  | 2.89×10 <sup>-3</sup> ↓GLCE, ↓↓TNFAIP6                                                                                                         |
| Reproductive System Development and Function   Tissue Morphology                                                                                                                              | quantity            | quantity of Leydig cells               | 2  | 2.89×10 <sup>-3</sup> ↓↓CYP19A1, ↓↓LHCGR                                                                                                       |

|                                                                                                                      |                                     |                                         |    |                       |                                                                                                 |
|----------------------------------------------------------------------------------------------------------------------|-------------------------------------|-----------------------------------------|----|-----------------------|-------------------------------------------------------------------------------------------------|
| Lipid Metabolism   Molecular Transport   Small Molecule Biochemistry                                                 | release                             | release of oleic acid                   | 2  | 2.89×10 <sup>-3</sup> | ↓CAV1, ↓CAV2                                                                                    |
| Lipid Metabolism   Molecular Transport   Small Molecule Biochemistry                                                 | concentration                       | concentration of sphingomyelin          | 3  | 2.99×10 <sup>-3</sup> | ↓BHMT, ↓CAV1, ↓↓SGMS2                                                                           |
| Cell Morphology   Connective Tissue Development and Function   Skeletal and Muscular System Development and Function | mineralization                      | mineralization of osteoblasts           | 3  | 2.99×10 <sup>-3</sup> | ↓POSTN, ↑↑SLC20A1, ↓SMAD7                                                                       |
| Cancer                                                                                                               | upper aerodigestive tract carcinoma | upper aerodigestive tract carcinoma     | 6  | 3.00×10 <sup>-3</sup> | ↓BHMT, ↓CAV1, ↑↑KAT6A, ↓POSTN, ↑↑SYNE1, ↓TYMS                                                   |
| Cancer   Neurological Disease                                                                                        | brain cancer                        | brain cancer                            | 10 | 3.09×10 <sup>-3</sup> | ↓↓ABCA8, ↑↑ALCAM, ↓↓ANGPT2, ↓CAV1, ↓CDCA7L, ↑COL4A2, ↓H3F3A/H3F3B, ↓↓KCNAB1, ↑↑MAP4K4, ↓SLC12A2 |
| Molecular Transport                                                                                                  | transport                           | transport of metal ion                  | 10 | 3.09×10 <sup>-3</sup> | ↓↓ACTN2, ↑↑ANK3, ↓↓ATP2B1, ↓CAV1, ↓↓KCNAB1, ↑KCNNG3, ↑↑KCNJ8, ↓↓RYR2, ↓SLC12A2, ↑↑SLC20A1       |
| Cardiovascular System Development and Function   Cell Death and Survival                                             | cell viability                      | cell viability of endothelial cells     | 4  | 3.51×10 <sup>-3</sup> | ↓↓ANGPT2, ↑↑ANGPTL1, ↑↑BTC, ↑↑FOXO1                                                             |
| Cancer   Neurological Disease                                                                                        | glioblastoma cancer                 | glioblastoma cancer                     | 8  | 3.60×10 <sup>-3</sup> | ↓↓ABCA8, ↑↑ALCAM, ↓↓ANGPT2, ↓CAV1, ↑COL4A2, ↓↓KCNAB1, ↑↑MAP4K4, ↓SLC12A2                        |
| Cardiovascular System Development and Function   Organ Morphology   Organismal Development                           | abnormal morphology                 | abnormal morphology of trabeculae carne | 3  | 3.65×10 <sup>-3</sup> | ↓EGLN1, ↓↓RYR2, ↓SMAD7                                                                          |
| Connective Tissue Development and Function   Skeletal and Muscular System Development and Function                   | strength                            | strength of bone                        | 3  | 3.65×10 <sup>-3</sup> | ↓CAV1, ↓↓COL12A1, ↓POSTN                                                                        |

|                                                                                                              |                           |                                           |   |                       |                                |
|--------------------------------------------------------------------------------------------------------------|---------------------------|-------------------------------------------|---|-----------------------|--------------------------------|
| Digestive System Development and Function   Organ Morphology                                                 | abnormal morphology       | abnormal morphology of cecum              | 2 | 3.69×10 <sup>-3</sup> | ↓GUCY1B3, ↓SLC12A2             |
| Reproductive System Development and Function   Tissue Morphology                                             | abnormal morphology       | abnormal morphology of epigonadal fat pad | 2 | 3.69×10 <sup>-3</sup> | ↓CAV1, ↓↓CYP19A1               |
| Organismal Injury and Abnormalities   Renal and Urological Disease                                           | bleeding                  | bleeding of kidney                        | 2 | 3.69×10 <sup>-3</sup> | ↑↑COL4A3, ↑↑HNRNPD             |
| Connective Tissue Disorders   Developmental Disorder   Hereditary Disorder   Skeletal and Muscular Disorders | brachyphalangia           | brachyphalangia                           | 2 | 3.69×10 <sup>-3</sup> | ↑↑BMPR1B, ↓LMBR1               |
| Lipid Metabolism   Small Molecule Biochemistry                                                               | conversion                | conversion of prostaglandin h2            | 2 | 3.69×10 <sup>-3</sup> | ↑CYP2B6, ↓↓PTGIS               |
| Cellular Assembly and Organization   Cellular Function and Maintenance                                       | formation                 | formation of caveolae                     | 2 | 3.69×10 <sup>-3</sup> | ↓CAV1, ↓CAV2                   |
| Cellular Assembly and Organization                                                                           | induction                 | induction of actin stress fibers          | 2 | 3.69×10 <sup>-3</sup> | ↑↑DCN, ↓SMAD7                  |
| Cellular Assembly and Organization                                                                           | organization              | organization of vesicles                  | 2 | 3.69×10 <sup>-3</sup> | ↓CAV1, ↓CAV2                   |
| Reproductive System Development and Function   Tissue Morphology                                             | quantity                  | quantity of spermatocytes                 | 2 | 3.69×10 <sup>-3</sup> | ↓↓LHCGR, ↓SLC12A2              |
| Cancer   Gastrointestinal Disease                                                                            | esophageal adenocarcinoma | esophageal adenocarcinoma                 | 4 | 3.95×10 <sup>-3</sup> | ↓BHMT, ↓CAV1, ↑↑KAT6A, ↑↑SYNE1 |

|                                                                                                                                                                                                                 |                       |                                      |    |                       |                                                                                                                  |
|-----------------------------------------------------------------------------------------------------------------------------------------------------------------------------------------------------------------|-----------------------|--------------------------------------|----|-----------------------|------------------------------------------------------------------------------------------------------------------|
| Connective Tissue Development and Function   Embryonic Development   Organ Development   Organ Morphology   Organismal Development   Skeletal and Muscular System Development and Function   Tissue Development | abnormal morphology   | abnormal morphology of bone          | 13 | 4.08×10 <sup>-3</sup> | ↑↑BMPR1B, ↓CAV1, ↓↓COL12A1, ↓↓CTSV, ↓↓CYP19A1, ↓GLCE, ↑↑KAT6A, ↓LMBR1, ↓NME5, ↑↑NOV, ↓RIMS2, ↑↑TFPI, ↑↑TNFRSF11A |
| Cardiovascular System Development and Function   Lymphoid Tissue Structure and Development                                                                                                                      | formation             | formation of neointima               | 4  | 4.18×10 <sup>-3</sup> | ↓↓GUCY1A3, ↓GUCY1B3, ↓↓PTGIS, ↑↑TFPI                                                                             |
| Cancer   Cell Cycle                                                                                                                                                                                             | G1 phase              | arrest in G1 phase of tumor cells    | 2  | 4.58×10 <sup>-3</sup> | ↑↑DCN, ↓SKP2                                                                                                     |
| Developmental Disorder   Hereditary Disorder   Metabolic Disease   Neurological Disease   Ophthalmic Disease   Skeletal and Muscular Disorders                                                                  | Leber's optic atrophy | Leber's optic atrophy                | 2  | 4.58×10 <sup>-3</sup> | ↓↓MT-ND2, ↓↓MT-ND4L                                                                                              |
| Organ Morphology   Organismal Development   Reproductive System Development and Function                                                                                                                        | abnormal morphology   | abnormal morphology of uterine gland | 2  | 4.58×10 <sup>-3</sup> | ↑↑BMPR1B, ↓CAV1                                                                                                  |
| Cellular Movement                                                                                                                                                                                               | migration             | migration of prostate cancer cells   | 2  | 4.58×10 <sup>-3</sup> | ↓CAV1, ↑↑NOV                                                                                                     |
| Carbohydrate Metabolism   Small Molecule Biochemistry                                                                                                                                                           | sulfation             | sulfation of glycosaminoglycan       | 2  | 4.58×10 <sup>-3</sup> | ↓CHST7, ↓GLCE                                                                                                    |

|                                                                                                                                                                                                                                     |                      |                                              |    |                       |                                                                                                                                                                       |
|-------------------------------------------------------------------------------------------------------------------------------------------------------------------------------------------------------------------------------------|----------------------|----------------------------------------------|----|-----------------------|-----------------------------------------------------------------------------------------------------------------------------------------------------------------------|
| Connective Tissue Disorders   Immunological Disease   Inflammatory Disease   Skeletal and Muscular Disorders                                                                                                                        | rheumatoid arthritis | rheumatoid arthritis                         | 18 | 4.59×10 <sup>-3</sup> | ↓BHMT, ↑↑BTC, ↑COL4A2, ↓↓CYP19A1, ↑CYP2B6, ↑↑FOXO1, ↓H3F3A/H3F3B, ↓HMGB1, ↑↑MAP4K4, ↓↓MMP1, ↑NAA25, ↓↓PTGIS, ↑↑SLC7A2, ↑↑SND1, ↑↑SYNE1, ↓↓TNFAIP6, ↑↑TNFRSF11A, ↓TYMS |
| Molecular Transport                                                                                                                                                                                                                 | transport            | transport of K+                              | 5  | 4.81×10 <sup>-3</sup> | ↓↓ACTN2, ↓↓KCNAB1, ↑KCNG3, ↑↑KCNJ8, ↓SLC12A2                                                                                                                          |
| Cancer   Gastrointestinal Disease                                                                                                                                                                                                   | esophageal carcinoma | esophageal carcinoma                         | 5  | 5.01×10 <sup>-3</sup> | ↓BHMT, ↓CAV1, ↑↑KAT6A, ↓POSTN, ↑↑SYNE1                                                                                                                                |
| Cancer                                                                                                                                                                                                                              | hyperplasia          | hyperplasia of epithelial cells              | 4  | 5.21×10 <sup>-3</sup> | ↓CAV1, ↓↓CTSV, ↑↑RORA, ↓SMAD7                                                                                                                                         |
| Cardiovascular System Development and Function                                                                                                                                                                                      | abnormal morphology  | abnormal morphology of cardiovascular system | 16 | 5.50×10 <sup>-3</sup> | ↑↑BTC, ↓CAV1, ↑↑COL4A3, ↓↓COL5A1, ↓EGLN1, ↑↑FOXO1, ↓↓GUCY1A3, ↑↑HPGD, ↑↑KAT6A, ↑↑NOV, ↓POSTN, ↓↓PTGIS, ↓↓RYR2, ↓SMAD7, ↑↑VWF, ↓ZEB1                                   |
| Connective Tissue Disorders   Developmental Disorder   Metabolic Disease   Skeletal and Muscular Disorders                                                                                                                          | Paget's disease      | Paget's disease                              | 2  | 5.56×10 <sup>-3</sup> | ↓GGPS1, ↑↑TNFRSF11A                                                                                                                                                   |
| Connective Tissue Development and Function   Embryonic Development   Organ Development   Organ Morphology   Organismal Development   Skeletal and Muscular System Development and Function   Tissue Development   Tissue Morphology | abnormal morphology  | abnormal morphology of trabecula             | 2  | 5.56×10 <sup>-3</sup> | ↓CAV1, ↓↓CYP19A1                                                                                                                                                      |
| Organ Morphology   Organismal Development   Organismal Injury and Abnormalities   Renal and Urological System Development and Function                                                                                              | atrophy              | atrophy of renal cortex                      | 2  | 5.56×10 <sup>-3</sup> | ↑↑ADAMTS1, ↓↓PTGIS                                                                                                                                                    |



|                                                                                                                  |                                         |                                         |    |                                                                                                                                                                    |
|------------------------------------------------------------------------------------------------------------------|-----------------------------------------|-----------------------------------------|----|--------------------------------------------------------------------------------------------------------------------------------------------------------------------|
| Cell-To-Cell Signaling and Interaction   Nervous System Development and Function                                 | auditory evoked potential               | abnormal auditory evoked potential      | 2  | 5.56×10 <sup>-3</sup> ↓↓CYP19A1, ↓SLC12A2                                                                                                                          |
| Cellular Development   Cellular Growth and Proliferation   Reproductive System Development and Function          | expansion                               | expansion of cumulus cells              | 2  | 5.56×10 <sup>-3</sup> ↑↑BTC, ↓↓TNFAIP6                                                                                                                             |
| Cancer   Organismal Injury and Abnormalities   Reproductive System Disease                                       | hormone receptor positive breast cancer | hormone receptor positive breast cancer | 2  | 5.56×10 <sup>-3</sup> ↓↓CYP19A1, ↓↓LHCGR                                                                                                                           |
| Cancer   Gastrointestinal Disease   Hepatic System Disease                                                       | liver adenoma                           | liver adenoma                           | 2  | 5.56×10 <sup>-3</sup> ↓BHMT, ↓↓SLC2A1                                                                                                                              |
| Lipid Metabolism   Small Molecule Biochemistry                                                                   | synthesis                               | synthesis of sphingomyelin              | 2  | 5.56×10 <sup>-3</sup> ↓↓ABCA8, ↓↓SGMS2                                                                                                                             |
| Cardiovascular Disease   Hematological Disease                                                                   | thrombosis                              | thrombosis of carotid artery            | 2  | 5.56×10 <sup>-3</sup> ↓GUCY1B3, ↑↑TFPI                                                                                                                             |
| Cardiovascular System Development and Function                                                                   | morphology                              | morphology of cardiovascular system     | 17 | 5.61×10 <sup>-3</sup> ↑↑BTC, ↓CAV1, ↑↑COL4A3, ↓↓COL5A1, ↓EGLN1, ↑↑FOXO1, ↓↓GUCY1A3, ↑↑HPGD, ↑↑KAT6A, ↓MAP2K6, ↑↑NOV, ↓POSTN, ↓↓PTGIS, ↓↓RYR2, ↓SMAD7, ↑↑VWF, ↓ZEB1 |
| Cardiovascular System Development and Function   Cell Morphology   Cellular Development   Organismal Development | branching                               | branching of blood vessel               | 3  | 5.67×10 <sup>-3</sup> ↑↑ADAMTS1, ↓↓ANGPT2, ↓VEGFC                                                                                                                  |
| Cancer   Tumor Morphology                                                                                        | progression                             | progression of malignant tumor          | 4  | 5.78×10 <sup>-3</sup> ↑↑FOXO1, ↓HMGB1, ↓↓MMP1, ↓SKP2                                                                                                               |

|                                      |                    |                    |    |                                                                                                                                                                                                                                                                                                                                                                                                                                                                                                                                                                                                                                                                                                                                                                                                                                                                                                                                                                                                                                          |
|--------------------------------------|--------------------|--------------------|----|------------------------------------------------------------------------------------------------------------------------------------------------------------------------------------------------------------------------------------------------------------------------------------------------------------------------------------------------------------------------------------------------------------------------------------------------------------------------------------------------------------------------------------------------------------------------------------------------------------------------------------------------------------------------------------------------------------------------------------------------------------------------------------------------------------------------------------------------------------------------------------------------------------------------------------------------------------------------------------------------------------------------------------------|
| Cancer                               | adenocarcinom<br>a | adenocarcinom<br>a | 73 | $5.84 \times 10^{-3}$ <p>           ↓↓ABCA8, ↑ACPP, ↓↓ACTN2,<br/>           ↑↑ADAMTS1, ↓AJUBA,<br/>           ↑↑AKR1C1/AKR1C2, ↑↑ALCAM, ↓ALG9,<br/>           ↑↑ANK3, ↑↑ANKRD28, ↓ARV1, ↓ASAP1,<br/>           ↓BHMT, ↓CAV1, ↓↓CBWD3/CBWD6,<br/>           ↓CES1, ↓CKLF, ↓↓COL12A1, ↑↑COL14A1,<br/>           ↓↓COX4I1, ↓↓DAPK1, ↓DCAF13,<br/>           ↓↓DCLK1, ↑↑DCN, ↑↑DST, ↓↓ELAVL2,<br/>           ↓ETAA1, ↑↑FAM13A, ↓FANK1, ↑↑FOXO1,<br/>           ↓GGPS1, ↑↑GPR116, ↓↓GUCY1A3,<br/>           ↓HMCN1, ↓HMGB1, ↓IFT81, ↑↑KAT6A,<br/>           ↓↓LHCGR, ↑↑MAP4K4, ↓mir-210, ↓↓MT-<br/>           ND2, ↑MT1X, ↓NIN, ↑↑NOV, ↓↓OLFM4,<br/>           ↑↑PABPC1, ↓PARP11, ↓↓PELP1, ↓PON2,<br/>           ↓POSTN, ↑↑PRICKLE1, ↓PROSC,<br/>           ↓RARS2, ↓↓RGS7, ↑↑RHOQ, ↓↓RHPN2,<br/>           ↓↓RIF1, ↓RIMS2, ↓↓RIN2, ↓↓RZR2,<br/>           ↑SHC4, ↓SKP2, ↓SLC12A2, ↓SMAD7,<br/>           ↑↑SYNE1, ↓↓TNFAIP6, ↑TOX, ↓TYMS,<br/>           ↓↓UGT1A9 (includes others), ↓↓UST,<br/>           ↓VEGFC, ↑↑VWF, ↓ZEB1         </p> |
| Cancer   Gastrointestinal<br>Disease | colon cancer       | colon cancer       | 54 | $5.84 \times 10^{-3}$ <p>           ↑ACPP, ↑↑ADAMTS1,<br/>           ↑↑AKR1C1/AKR1C2, ↑↑ALCAM, ↓ALG9,<br/>           ↑↑ANK3, ↑↑ANKRD28, ↑↑ANXA4, ↓ARV1,<br/>           ↓ASAP1, ↓CAV1, ↓↓CBWD3/CBWD6,<br/>           ↓CKLF, ↓↓COL12A1, ↑↑COL14A1,<br/>           ↑↑CPEB4, ↓↓CRIP1, ↓↓DAPK1, ↓↓DCLK1,<br/>           ↑↑DCN, ↑↑DST, ↓↓ELAVL2, ↓ETAA1,<br/>           ↓FANK1, ↑↑GPR116, ↓↓GUCY1A3,<br/>           ↓HMCN1, ↑↑KAT6A, ↑↑KCNJ8, ↓↓LHCGR,<br/>           ↑↑MAP4K4, ↑MT1X, ↓NIN, ↑↑NOV,<br/>           ↓↓OLFM4, ↓PARP11, ↓↓PELP1, ↑↑RHOQ,<br/>           ↓↓RHPN2, ↓↓RIF1, ↓RIMS2, ↓↓RIN2,<br/>           ↓↓RZR2, ↑SHC4, ↓SKP2, ↓SLC12A2,<br/>           ↓↓SLC26A2, ↑↑SYNE1, ↓↓TNFAIP6, ↑TOX,<br/>           ↓TYMS, ↓↓UGT1A9 (includes others),<br/>           ↓↓UST, ↑↑VWF         </p>                                                                                                                                                                                                                                            |

|                                                                                      |                              |                                        |    |                       |                                                                                                                                                                                                                                                                                                                                                                                                                                                                                               |
|--------------------------------------------------------------------------------------|------------------------------|----------------------------------------|----|-----------------------|-----------------------------------------------------------------------------------------------------------------------------------------------------------------------------------------------------------------------------------------------------------------------------------------------------------------------------------------------------------------------------------------------------------------------------------------------------------------------------------------------|
| Organismal Development                                                               | abnormal morphology          | abnormal morphology of thoracic cavity | 15 | 5.89×10 <sup>-3</sup> | ↑↑BTC, ↓CAV1, ↓CAV2, ↑↑DCN, ↓EGLN1, ↓ELK3, ↓GLCE, ↑↑GPR116, ↑↑KAT6A, ↑↑NOV, ↓POSTN, ↓↓RYR2, ↓SMAD7, ↑↑SYNE1, ↓ZEB1                                                                                                                                                                                                                                                                                                                                                                            |
| Cancer   Organismal Injury and Abnormalities   Reproductive System Disease           | carcinoma                    | carcinoma in breast                    | 20 | 5.98×10 <sup>-3</sup> | ↓↓ABCA8, ↑ACPP, ↓↓ACTN2, ↑↑ADAMTS1, ↓BCAT1, ↓CAV1, ↓CES1, ↓CHST7, ↓↓COL12A1, ↓↓COX4I1, ↓↓CYP19A1, ↓↓LHCGR, ↓mir-210, ↓↓MT-ND2, ↑MT1X, ↓↓PID1, ↓PROSC, ↓↓RHPN2, ↑↑SYNE1, ↓TYMS                                                                                                                                                                                                                                                                                                                 |
| Cellular Function and Maintenance                                                    | function                     | function of connective tissue cells    | 5  | 6.07×10 <sup>-3</sup> | ↓CAV1, ↓↓COL12A1, ↓↓CTSV, ↓↓CYP19A1, ↑↑TNFRSF11A                                                                                                                                                                                                                                                                                                                                                                                                                                              |
| Cancer   Gastrointestinal Disease                                                    | gastrointestinal carcinoma   | gastrointestinal carcinoma             | 53 | 6.09×10 <sup>-3</sup> | ↑ACPP, ↑↑ADAMTS1, ↑↑AKR1C1/AKR1C2, ↑↑ALCAM, ↓ALG9, ↑↑ANK3, ↑↑ANKRD28, ↑↑ANXA4, ↓ARV1, ↓ASAP1, ↓BHMT, ↓CANX, ↓CAV1, ↓↓CBWD3/CBWD6, ↓CKLF, ↓↓COL12A1, ↑↑COL14A1, ↓↓DAPK1, ↓DCAF13, ↓↓DCLK1, ↑↑DCN, ↑↑DST, ↓↓ELAVL2, ↓ETAA1, ↓FANK1, ↑↑GPR116, ↓↓GUCY1A3, ↓HMCN1, ↑↑KAT6A, ↓↓LHCGR, ↑↑MAP4K4, ↓NIN, ↑↑NOV, ↓↓OLFM4, ↓PARP11, ↓↓PELP1, ↓POSTN, ↑↑RHOQ, ↓↓RHPN2, ↓↓RIF1, ↓RIMS2, ↓↓RIN2, ↓↓RYR2, ↑SHC4, ↓SKP2, ↓SLC12A2, ↑↑SYNE1, ↓↓TNFAIP6, ↑TOX, ↓TYMS, ↓↓UGT1A9 (includes others), ↓↓UST, ↑↑VWF |
| Cancer   Cellular Development   Cellular Growth and Proliferation   Tumor Morphology | metastasis                   | metastasis of malignant tumor          | 3  | 6.14×10 <sup>-3</sup> | ↑↑ANGPTL1, ↓CDCA7L, ↓VEGFC                                                                                                                                                                                                                                                                                                                                                                                                                                                                    |
| Cancer   Hematological Disease   Immunological Disease                               | T-cell non-Hodgkin's disease | T-cell non-Hodgkin's disease           | 7  | 6.32×10 <sup>-3</sup> | ↓↓COL12A1, ↑COL4A2, ↑↑DCN, ↓HMGB1, ↓SKP2, ↓TYMS, ↓ZEB1                                                                                                                                                                                                                                                                                                                                                                                                                                        |

|                                                                                                                                                 |                                |                                     |    |                       |                                                                                                                 |
|-------------------------------------------------------------------------------------------------------------------------------------------------|--------------------------------|-------------------------------------|----|-----------------------|-----------------------------------------------------------------------------------------------------------------|
| Tissue Morphology                                                                                                                               | morphology                     | morphology of connective tissue     | 13 | 6.38×10 <sup>-3</sup> | ↑↑BMPR1B, ↓CAV1, ↓↓COL12A1, ↓↓CTSV, ↓↓CYP19A1, ↑↑DCN, ↓↓LHCGR, ↑↑NOV, ↓POSTN, ↓↓PTGIS, ↓↓RYSR2, ↓SLC12A2, ↑↑VWF |
| Embryonic Development   Organ Development   Organismal Development   Skeletal and Muscular System Development and Function   Tissue Development | development                    | development of striated muscle      | 6  | 6.41×10 <sup>-3</sup> | ↓CAV1, ↓EGLN1, ↑↑FOXO1, ↓HMGB1, ↑↑RGS4, ↓SMAD7                                                                  |
| Lipid Metabolism   Molecular Transport   Small Molecule Biochemistry                                                                            | abnormal quantity              | abnormal quantity of lipid          | 6  | 6.61×10 <sup>-3</sup> | ↓BHMT, ↓CAV1, ↑↑GPR116, ↑↑HPGD, ↓↓PTGIS, ↓↓SGMS2                                                                |
| Tissue Morphology                                                                                                                               | diameter                       | diameter of long bones              | 2  | 6.63×10 <sup>-3</sup> | ↑↑DCN, ↑↑TNFRSF11A                                                                                              |
| Cellular Movement   Skeletal and Muscular System Development and Function                                                                       | migration                      | migration of muscle precursor cells | 2  | 6.63×10 <sup>-3</sup> | ↑↑FOXO1, ↓HMGB1                                                                                                 |
| Cardiovascular Disease   Hereditary Disorder   Respiratory Disease                                                                              | primary pulmonary hypertension | primary pulmonary hypertension      | 2  | 6.63×10 <sup>-3</sup> | ↑↑BMPR1B, ↓CAV1                                                                                                 |
| Cardiovascular System Development and Function   Cell Morphology   Cellular Development   Organismal Development                                | sprouting                      | sprouting of capillary vessel       | 2  | 6.63×10 <sup>-3</sup> | ↑↑ADAMTS1, ↓↓ANGPT2                                                                                             |
| Organismal Injury and Abnormalities                                                                                                             | wound                          | Wound                               | 7  | 6.81×10 <sup>-3</sup> | ↓AJUBA, ↓CAV1, ↓↓COL5A1, ↓ELK3, ↓HMGB1, ↓POSTN, ↓SKP2                                                           |
| Cardiovascular Disease   Hematological Disease                                                                                                  | thrombosis                     | Thrombosis                          | 6  | 7.01×10 <sup>-3</sup> | ↓↓ANGPT2, ↑↑BTC, ↓GUCY1B3, ↑↑TFPI, ↓VEGFC, ↑↑VWF                                                                |
| Cellular Growth and Proliferation                                                                                                               | proliferation                  | proliferation of ovarian cells      | 3  | 7.14×10 <sup>-3</sup> | ↑↑BTC, ↑↑FOXO1, ↓↓TNFAIP6                                                                                       |
| Cardiovascular System Development and Function   Tissue Morphology                                                                              | quantity                       | quantity of endothelial cells       | 3  | 7.14×10 <sup>-3</sup> | ↓↓ANGPT2, ↓CAV1, ↓CAV2                                                                                          |

|                                                                                                                                                                 |                                   |                                                              |   |                       |                                                             |
|-----------------------------------------------------------------------------------------------------------------------------------------------------------------|-----------------------------------|--------------------------------------------------------------|---|-----------------------|-------------------------------------------------------------|
| Carbohydrate Metabolism   Small Molecule Biochemistry                                                                                                           | synthesis                         | synthesis of glycosaminoglycan                               | 4 | 7.39×10 <sup>-3</sup> | ↓CHST7, ↓GLCE, ↓↓TNFAIP6, ↓VEGFC                            |
| Organismal Injury and Abnormalities   Renal and Urological Disease                                                                                              | failure                           | failure of kidney                                            | 7 | 7.52×10 <sup>-3</sup> | ↑↑COL4A3, ↑↑DCN, ↓↓GUCY1A3, ↓GUCY1B3, ↓PDE7B, ↓SKP2, ↑↑TFPI |
| Cancer   Gastrointestinal Disease                                                                                                                               | esophageal cancer                 | esophageal cancer                                            | 6 | 7.64×10 <sup>-3</sup> | ↓BHMT, ↓CAV1, ↑↑KAT6A, ↓POSTN, ↑↑SYNE1, ↓TYMS               |
| Cellular Movement   Connective Tissue Development and Function                                                                                                  | chemotaxis                        | chemotaxis of fibroblasts                                    | 3 | 7.68×10 <sup>-3</sup> | ↓↓ANGPT2, ↓HMGB1, ↑↑NOV                                     |
| Cancer   Cellular Development   Cellular Growth and Proliferation   Reproductive System Disease                                                                 | metastasis                        | metastasis of breast cancer cell lines                       | 3 | 7.68×10 <sup>-3</sup> | ↑↑ADAMTS1, ↑↑ANGPTL1, ↑↑SND1                                |
| Lipid Metabolism   Molecular Transport   Small Molecule Biochemistry                                                                                            | abnormal quantity                 | abnormal quantity of prostaglandin                           | 2 | 7.78×10 <sup>-3</sup> | ↑↑HPGD, ↓↓PTGIS                                             |
| Organismal Injury and Abnormalities   Reproductive System Disease                                                                                               | anovulation                       | anovulation                                                  | 2 | 7.78×10 <sup>-3</sup> | ↓↓CYP19A1, ↓↓LHCGR                                          |
| Cellular Development                                                                                                                                            | epithelial-mesenchymal transition | epithelial-mesenchymal transition of colon cancer cell lines | 2 | 7.78×10 <sup>-3</sup> | ↓CAV1, ↓ZEB1                                                |
| Cardiovascular System Development and Function   Embryonic Development   Lymphoid Tissue Structure and Development   Organ Development   Organismal Development | formation                         | formation of lymph vessel                                    | 2 | 7.78×10 <sup>-3</sup> | ↓↓ANGPT2, ↓VEGFC                                            |
| Carbohydrate Metabolism   Energy Production   Small Molecule Biochemistry                                                                                       | oxidation                         | oxidation of D-glucose                                       | 3 | 8.24×10 <sup>-3</sup> | ↓BHMT, ↑↑NOV, ↓↓SLC2A1                                      |

|                                                                                        |                                 |                                          |    |                       |                                                                                                                                                                                                                                                                                                                                                                                                                                                                       |
|----------------------------------------------------------------------------------------|---------------------------------|------------------------------------------|----|-----------------------|-----------------------------------------------------------------------------------------------------------------------------------------------------------------------------------------------------------------------------------------------------------------------------------------------------------------------------------------------------------------------------------------------------------------------------------------------------------------------|
| Cancer   Hematological Disease   Immunological Disease                                 | peripheral T-cell lymphoma      | peripheral T-cell lymphoma               | 3  | 8.24×10 <sup>-3</sup> | ↓↓COL12A1, ↑COL4A2, ↓TYMS                                                                                                                                                                                                                                                                                                                                                                                                                                             |
| Cancer   Gastrointestinal Disease                                                      | gastrointestinal adenocarcinoma | gastrointestinal adenocarcinoma          | 50 | 8.49×10 <sup>-3</sup> | ↑ACPP, ↑↑ADAMTS1, ↑↑AKR1C1/AKR1C2, ↑↑ALCAM, ↓ALG9, ↑↑ANK3, ↑↑ANKRD28, ↓ARV1, ↓ASAP1, ↓BHMT, ↓CAV1, ↓↓CBWD3/CBWD6, ↓CKLF, ↓↓COL12A1, ↑↑COL14A1, ↓↓DAPK1, ↓DCAF13, ↓↓DCLK1, ↑↑DCN, ↑↑DST, ↓↓ELAVL2, ↓ETAA1, ↓FANK1, ↑↑GPR116, ↓↓GUCY1A3, ↓HMCN1, ↑↑KAT6A, ↓↓LHCGR, ↑↑MAP4K4, ↓NIN, ↑↑NOV, ↓↓OLFM4, ↓PARP11, ↓↓PELP1, ↑↑RHOQ, ↓↓RHPN2, ↓↓RIF1, ↓RIMS2, ↓↓RIN2, ↓↓RYR2, ↑SHC4, ↓SKP2, ↓SLC12A2, ↑↑SYNE1, ↓↓TNFAIP6, ↑TOX, ↓TYMS, ↓↓UGT1A9 (includes others), ↓↓UST, ↑↑VWF |
| Tissue Morphology                                                                      | abnormal morphology             | abnormal morphology of epithelial tissue | 11 | 8.59×10 <sup>-3</sup> | ↓CAV1, ↓CAV2, ↑↑COL4A3, ↓↓CYP19A1, ↑↑DCN, ↑↑GPR116, ↓↓LHCGR, ↓POSTN, ↓SLC12A2, ↑↑TNFRSF11A, ↓ZEB1                                                                                                                                                                                                                                                                                                                                                                     |
| Drug Metabolism   Lipid Metabolism   Molecular Transport   Small Molecule Biochemistry | concentration                   | concentration of prostaglandin E2        | 3  | 8.82×10 <sup>-3</sup> | ↑↑HPGD, ↓↓LHCGR, ↓↓PTGIS                                                                                                                                                                                                                                                                                                                                                                                                                                              |
| Cancer   Cellular Movement   Tumor Morphology                                          | invasion                        | invasion of mammary tumor cells          | 3  | 8.82×10 <sup>-3</sup> | ↓ASAP1, ↓↓MMP1, ↓VEGFC                                                                                                                                                                                                                                                                                                                                                                                                                                                |
| Organ Morphology   Reproductive System Development and Function                        | size                            | size of gonad                            | 3  | 8.82×10 <sup>-3</sup> | ↓↓CYP19A1, ↓↓LHCGR, ↓SLC12A2                                                                                                                                                                                                                                                                                                                                                                                                                                          |
| Cell Morphology   Cellular Assembly and Organization                                   | abnormal morphology             | abnormal morphology of collagen fibrils  | 2  | 9.01×10 <sup>-3</sup> | ↓↓COL5A1, ↑↑DCN                                                                                                                                                                                                                                                                                                                                                                                                                                                       |
| Cellular Development   Hematopoiesis                                                   | commitment                      | commitment of leukocytes                 | 2  | 9.01×10 <sup>-3</sup> | ↑↑TNFRSF11A, ↑TOX                                                                                                                                                                                                                                                                                                                                                                                                                                                     |

|                                                                                                    |                           |                                                      |    |                       |                                                                                                                                                                                                          |
|----------------------------------------------------------------------------------------------------|---------------------------|------------------------------------------------------|----|-----------------------|----------------------------------------------------------------------------------------------------------------------------------------------------------------------------------------------------------|
| Cell Cycle   Cell-To-Cell Signaling and Interaction   Cellular Growth and Proliferation            | contact growth inhibition | contact growth inhibition of connective tissue cells | 2  | 9.01×10 <sup>-3</sup> | ↓SMAD7, ↓ZEB1                                                                                                                                                                                            |
| Ophthalmic Disease                                                                                 | corneal dystrophy         | corneal dystrophy                                    | 2  | 9.01×10 <sup>-3</sup> | ↓POSTN, ↓ZEB1                                                                                                                                                                                            |
| Cellular Development   Cellular Growth and Proliferation   Nervous System Development and Function | expansion                 | expansion of neurons                                 | 2  | 9.01×10 <sup>-3</sup> | ↑↑BTC, ↓IRX3                                                                                                                                                                                             |
| Cancer                                                                                             | hyperplasia               | hyperplasia of connective tissue cells               | 2  | 9.01×10 <sup>-3</sup> | ↓CAV1, ↑↑TNFRSF11A                                                                                                                                                                                       |
| Cancer   Cellular Movement   Tumor Morphology                                                      | invasion                  | invasion of melanoma cells                           | 2  | 9.01×10 <sup>-3</sup> | ↑↑ALCAM, ↑↑NOV                                                                                                                                                                                           |
| Cellular Movement                                                                                  | migration                 | migration of smooth muscle cell lines                | 2  | 9.01×10 <sup>-3</sup> | ↓↓GUCY1A3, ↓GUCY1B3                                                                                                                                                                                      |
| Hematological System Development and Function   Inflammatory Response   Tissue Morphology          | quantity                  | quantity of foam cells                               | 2  | 9.01×10 <sup>-3</sup> | ↓CES1, ↑↑GPR116                                                                                                                                                                                          |
| Organismal Injury and Abnormalities                                                                | shock response            | Shock Response                                       | 6  | 9.03×10 <sup>-3</sup> | ↓CAV1, ↑CYP2B6, ↓↓GUCY1A3, ↓GUCY1B3, ↓HMGB1, ↓PDE7B                                                                                                                                                      |
| Cancer   Hematological Disease   Immunological Disease                                             | non-Hodgkin's disease     | non-Hodgkin's disease                                | 12 | 9.09×10 <sup>-3</sup> | ↓↓COL12A1, ↑COL4A2, ↑↑DCN, ↓↓DYNC111, ↑↑FOXO1, ↓HMGB1, ↓↓JAKMIP2, ↑↑MAP4K4, ↓↓PDZRN3, ↓SKP2, ↓TYMS, ↓ZEB1                                                                                                |
| Connective Tissue Disorders   Skeletal and Muscular Disorders                                      | arthropathy               | arthropathy                                          | 22 | 9.33×10 <sup>-3</sup> | ↑↑ADAMTS1, ↓BHMT, ↑↑BTC, ↑COL4A2, ↓↓CYP19A1, ↑CYP2B6, ↓EGLN1, ↑↑FOXO1, ↓GGPS1, ↓H3F3A/H3F3B, ↓HMGB1, ↑↑HPGD, ↑↑MAP4K4, ↓↓MMP1, ↑NAA25, ↓↓PTGIS, ↑↑SLC7A2, ↑↑SND1, ↑↑SYNE1, ↓↓TNFAIP6, ↑↑TNFRSF11A, ↓TYMS |

|                                                                                          |                        |                                                         |   |                                                                     |
|------------------------------------------------------------------------------------------|------------------------|---------------------------------------------------------|---|---------------------------------------------------------------------|
| Organ Morphology   Organismal Development   Reproductive System Development and Function | abnormal morphology    | abnormal morphology of corpus luteum                    | 3 | 9.43×10 <sup>-3</sup> ↓↓CYP19A1, ↑↑HPGD, ↓↓LHCGR                    |
| Cell Death and Survival                                                                  | cell viability         | cell viability of bone cancer cell lines                | 3 | 9.43×10 <sup>-3</sup> ↓↓BNIP3, ↑↑DPP8, ↓MAP2K6                      |
| Cellular Function and Maintenance                                                        | function               | function of gonadal cells                               | 3 | 9.43×10 <sup>-3</sup> ↑↑AKAP4, ↓↓CYP19A1, ↓↓LHCGR                   |
| Cellular Movement                                                                        | cell movement          | cell movement of ovarian cancer cell lines              | 3 | 1.01×10 <sup>-2</sup> ↓CAV1, ↑↑MAP4K4, ↓↓ST3GAL5                    |
| Cardiovascular System Development and Function   Organ Morphology                        | dilation               | dilation of left ventricle                              | 3 | 1.01×10 <sup>-2</sup> ↓↓BNIP3, ↓CAV1, ↓↓SLC2A1                      |
| Embryonic Development   Organ Development   Organismal Development   Tissue Development  | formation              | formation of muscle                                     | 4 | 1.01×10 <sup>-2</sup> ↑↑FOXO1, ↓HMGB1, ↑↑NOV, ↑↑RGS4                |
| Cell Cycle                                                                               | cell cycle progression | arrest in cell cycle progression of lymphoma cell lines | 2 | 1.03×10 <sup>-2</sup> ↑↑FOXO1, ↓ZEB1                                |
| Organismal Functions   Organismal Injury and Abnormalities   Tissue Morphology           | healing                | healing of wound                                        | 6 | 1.03×10 <sup>-2</sup> ↓AJUBA, ↓CAV1, ↓↓COL5A1, ↓ELK3, ↓POSTN, ↓SKP2 |
| Cellular Movement                                                                        | migration              | migration of bladder cancer cell lines                  | 2 | 1.03×10 <sup>-2</sup> ↓CAV1, ↑↑DCN                                  |

---

Symbols for genes with increased (or decreased) expression and fold-change≥2 are preceded with ↑↑ (or ↓↓). Symbols for genes with increased (or decreased) expression and fold-change<2 are preceded with ↑ (or ↓).

---
