# Supplementary material
Source: PubMed Central journal article supplement (PMC4385968)
Supplement: tableS7.pdf [file tableS7.pdf]

Table S7. IPA Networks identified for genes affected in summer cumulus cells

| ID | Molecules in Network                                                                                                                                                                                                                                                                                                                                                                                                                                                                                                                                                                                                                                                          | Score | Focus     |                                                                                                                                                                               | Upstream regulators                                                                                                                                                                                                                                                       |
|----|-------------------------------------------------------------------------------------------------------------------------------------------------------------------------------------------------------------------------------------------------------------------------------------------------------------------------------------------------------------------------------------------------------------------------------------------------------------------------------------------------------------------------------------------------------------------------------------------------------------------------------------------------------------------------------|-------|-----------|-------------------------------------------------------------------------------------------------------------------------------------------------------------------------------|---------------------------------------------------------------------------------------------------------------------------------------------------------------------------------------------------------------------------------------------------------------------------|
|    |                                                                                                                                                                                                                                                                                                                                                                                                                                                                                                                                                                                                                                                                               |       | Molecules | Top Functions                                                                                                                                                                 |                                                                                                                                                                                                                                                                           |
| N1 | <p>↑ACPP, ↑↑ADAMTS1,<br/>           ↑↑AKR1C1/AKR1C2, ↑↑ALCAM,<br/>           ↓ALG9, Alpha catenin, ↓↓ATP2B1,<br/>           ↓BCAT1, ↓BHMT, ↑↑BTC, Cg,<br/>           ↓↓CTSV, Dynamin, ↓↓ELAVL2,<br/>           ↓ELK3, ERK1/2, FSH, ↓GGPS1,<br/>           Lh, ↑↑MAP4K4, ↑MT1X,<br/>           ↓PFKFB4, PI3K (family), Rab5,<br/>           ↓RABEP1, ↓RASD1, ↑↑RGS4,<br/>           ↓↓RGS7, ↑SEPT6, ↓SEPT11,<br/>           ↑SHC4, ↓SLC12A2, ↑↑SLC20A1,<br/>           ↓↓TNFAIP6, ↓VEGFC</p>                                                                                                                                                                                   | 49    | 27        | <p>Cellular Movement, Cell<br/>           Morphology, Cellular<br/>           Compromise</p>                                                                                  | <p>Cg(M/12), FSH(M/10),<br/>           Lh(M/9), ERK1/2(M/3),<br/>           Alpha catenin(M/4),<br/>           TGFB1(7), beta-<br/>           estradiol(5), IL1B(5),<br/>           TNF(9), OSM(5),<br/>           SB203580(5),<br/>           tretinoin(5), HNF4A(6)</p> |
| N2 | <p>Akt, ↑↑ANGPTL1, ↓CDCA7L,<br/>           ↓↓COL12A1, ↑↑COL14A1,<br/>           ↑COL4A2, ↑↑COL4A3,<br/>           ↓↓COL5A1, collagen, Collagen<br/>           Alpha1, Collagen type I, Collagen<br/>           type IV, Collagen(s), ↓↓COX4I1,<br/>           ↑↑DCN, ↓↓DDIT4, ↑↑HPGD,<br/>           Hsp27, ↑↑INPP4A, Integrin alpha<br/>           V beta 3, Laminin, ↓↓LHFP, ↓mir-<br/>           210, Mitochondrial complex 1,<br/>           ↓↓MMP1, ↓↓MT-ND2, ↓↓MT-<br/>           ND4L, MTORC1, ↑↑NOV, Pdgf<br/>           (complex), ↓↓PID1, ↓SMAD7,<br/>           ↓↓SORBS2, Tgf beta, ↑↑VWF</p>                                                                      | 37    | 22        | <p>Connective Tissue Disorders,<br/>           Dermatological Diseases and<br/>           Conditions, Gastrointestinal<br/>           Disease</p>                             | <p>Tgf beta(M/3), ↓mir-<br/>           210(M/3), Integrin alpha<br/>           V beta 3(M/1), Akt(M/2),<br/>           ↓SMAD7(M/3),<br/>           TGFB1(9), AHR(5),<br/>           TNF(6), tretinoin(6),<br/>           IL6(5), TP53(5)</p>                              |
| N3 | <p>alcohol group acceptor<br/>           phosphotransferase, ↓↓ANGPT2,<br/>           ↑↑ANXA4, Calcineurin protein(s),<br/>           calpain, ↓CDK8, ↓CPNE4, Cyclin<br/>           A, Cyclin E, ↓↓DCLK1, E2f,<br/>           ↓EGLN1, ↓↓GUCY1A3,<br/>           ↓GUCY1B3, Hdac, HISTONE,<br/>           Histone h3, Histone h4, Hsp70,<br/>           Hsp90, ↓IRX3, NFkB (complex),<br/>           Notch, ↓↓OLFM4, ↓↓PELP1, Pro-<br/>           inflammatory Cytokine, ↓↓PTGIS,<br/>           PXR ligand-PXR-Retinoic acid-<br/>           RXRα, ↓↓SAP30, ↓SMYD3,<br/>           SYK/ZAP, ↑↑TFPI, ↓TYMS,<br/>           ↓↓UGT1A9 (includes others),<br/>           ↓ZEB1</p> | 27    | 18        | <p>Cardiovascular System<br/>           Development and Function,<br/>           Lymphoid Tissue Structure<br/>           and Development, Cell<br/>           Morphology</p> | <p>Notch(M/3),<br/>           HISTONE(M/1), beta-<br/>           estradiol(7), MYC(4)</p>                                                                                                                                                                                 |

|    |                                                                                                                                                                                                                                                                                                                                   |    |    |                                                                                                |                                                                                                                                                                                               |
|----|-----------------------------------------------------------------------------------------------------------------------------------------------------------------------------------------------------------------------------------------------------------------------------------------------------------------------------------|----|----|------------------------------------------------------------------------------------------------|-----------------------------------------------------------------------------------------------------------------------------------------------------------------------------------------------|
| N4 | ADCY, Alpha Actinin, ↑↑ANK3, Ap1, ↑↑BMPR1B, Calmodulin, CaMKII, ↓CANX, ↓CAV1, ↓CAV2, Caveolin, ↓CES1, Creb, ERK, estrogen receptor, G protein alphas, Immunoglobulin, Integrin, ↑↑KCTD12, LDL, ↓MAP2K6, Mek, NMDA Receptor, PDGF BB, ↓PON2, ↓POSTN, Ras, ↑↑RHOQ, ↓↓RYR2, ↓↓SGMS2, ↓↓SLC2A1, ↑↑SLC7A2, Sos, ↑↑SYNE1, ↑↑TNFRSF11A   | 26 | 17 | Organismal Functions, Cancer, Organ Morphology                                                 | ↓CAV1(M/3), estrogen receptor(M/2), ↓CAV2(M/1), ERK(M/2), ↑↑BMPR1B(M/1), Ras(M/1), PDGF BB(M/3), TGFB1(5), beta-estradiol(7), D-glucose(4), TNF(5), AGT(4), PD98059(4), tretinoin(5), TP53(4) |
| N5 | ↑ACPL2, ↓↓ANKRD37, ↓BDH2, ↓DCAF13, DHCR24, ↑↑FAM13A, FEM1B, ↓GLCE, ↓KIAA1430, ↓↓KLHL23/PHOSPHO2-KLHL23, LONP1, ↓MRPL30, ↓MRPS10, ↓↓MT-ATP8, ↓NSG1, PACSIN1, POLG, ↑↑PRICKLE1, RAB34, RAPGEF2, ↓RARS2, ↓↓SLC26A2, TCF7L1, UBC, ZNF43, ZNF85, ZNF91, ZNF100, ZNF254, ↓ZNF350, ZNF429, ZNF431, ZNF528, ZNF665, ZNF708                | 24 | 16 | Cell Death and Survival, Cellular Assembly and Organization, Cellular Function and Maintenance | ZNF100(M/1), ZNF85(M/1), ZNF254(M/1), ZNF431(M/1), ZNF708(M/1), ZNF665(M/1), ZNF528(M/1), ZNF43(M/1), ZNF429(M/1), ZNF91(M/1), LONP1(M/1), WNT3A(2), PD98059(2), FGF1(2), HNF4A(2)            |
| N6 | AQP8, CDC42, cholesterol, CSHL1, ↑↑DNAJC1, E2F1, ↓↓ENO2, ↑↑FAM110B, GNAQ, HNF4A, IL17B, ↓INSIG2, ↑↑KCNJ8, LTA4H, ↑↑MAML2, MRPS12, NDUFS4, ↓NME5, NME7, NOTCH1, ↓↓OPN3, phosphatidylinositol 4, 5-diphosphate, PIP4K2A, ↑RBMS3, RELA, ↓↓RHPN2, ↓↓RIF1, ↓RNF144A, ↓SH3D19, SPIDR, ↓STYXL1, ↓TCEA3, TGFB1, thyroid hormone, ↓TRMT61B | 23 | 16 | Cellular Assembly and Organization, Cell Death and Survival, Cell Cycle                        | TGFB1(M/3), E2F1(M/1), HNF4A(M/3)                                                                                                                                                             |

|     |                                                                                                                                                                                                                                                                                                                        |    |    |                                                                                           |                                                                                                                                                                                                                                            |
|-----|------------------------------------------------------------------------------------------------------------------------------------------------------------------------------------------------------------------------------------------------------------------------------------------------------------------------|----|----|-------------------------------------------------------------------------------------------|--------------------------------------------------------------------------------------------------------------------------------------------------------------------------------------------------------------------------------------------|
| N7  | 14-3-3, Alp, AMPK, ↑AUTS2, ↓↓BNIP3, caspase, CD3, ↓↓CYP19A1, ↑CYP2B6, cytochrome C, ↓↓DAPK1, F Actin, ↑↑FOXO1, Gsk3, ↓H3F3A/H3F3B, ↓HMCN1, ↓HMGB1, IL1, Insulin, Interferon alpha, Jnk, P38 MAPK, p70 S6k, PI3K (complex), Pkc(s), ↑↑PKN2, PP2A, Proinsulin, ↓↓PYGL, ↓RIMS2, ↑↑RORA, ↓SKP2, ↓↓STC2, Tnf (family), ↑TOX | 23 | 16 | Cancer, Tumor Morphology, Cellular Movement                                               | IL1(M/3), P38 MAPK(M/2), ↓SKP2(M/1), ↑↑FOXO1(M/2), ↑↑TOX(M/1), ↑↑RORA(M/3), ↓HMGB1(M/1), Proinsulin(M/1), PI3K (complex)(M/2), TGFB1(4), beta-estradiol(5), CEBPA(4), progesterone(4), IL1B(5), OSM(4), butyric acid(5), HNF4A(8), TP53(4) |
| N8  | AP2M1, ↓ARV1, ↓↓C8orf47, ↓↓CBWD3/CBWD6, CCT3, EPS15, Epsin, ↓ETAA1, ↓IFT81, IFT88, KRT4, KRT6A, LAPTM5, ↓LMBR1, ↓↓LRRC49, MOB4, OPTN, ↓↓PABPC4L, RABGEF1, ↓RIMKLB, RNF11, ↓↓SLC22A23, STAM, ↓STON1, SYNJ1, UBC, UBE2E1, UBE2H, UBQLN2, VPRBP, ↓ZNF12, ZNF473, ↓ZNF627, ↓↓ZNF879, ↓ZSCAN29                              | 22 | 15 | Cellular Function and Maintenance, Infectious Disease, Developmental Disorder             |                                                                                                                                                                                                                                            |
| N9  | ABCF2, AGPAT2, ↑↑ALDH9A1, ANKRD26, ↑↑ANKRD28, ANKRD52, ↓CHST7, ↓CKLF, ↓↓CRIP1, CTTNBP2NL, EID2, ↑↑EID3, GOLGA4, MAGEB1, MAGED4/MAGED4B, ↓MRPL44, NDN, ↓NIN, ↓PARP11, PCBP4, PPP6R1, ↓PROSC, ↑RBFOX1, RBM24, ↓↓RIN2, RNF114, SCN8A, SMC6, TGS1, TNKS, TNKS2, ↓↓TRIM9, UBC, ↓↓UST, ZNF235                                | 20 | 14 | Cardiovascular System Development and Function, Organismal Development, Tissue Morphology | TGFB1(2), HNF4A(2), TP53(2)                                                                                                                                                                                                                |
| N10 | APP, ARF5, ↓ARL5A, CAPN1, ↓CCBL1, CGB (includes others), COX6A2, CRHR2, ↓↓DCLK1, DHCR24, HABP2, KCNA1, KCNA4, ↓↓KCNA1, KCNB1, KCNB2, KCND2, ↑KCNG3, KISS1R, ↓LARP6, MAK, MSTN, MT-CO3, MT-ND5, ↑NAA25, ↑↑NMRK1, SCN1A, ↓SERTM1, ↓↓SH3BGR, SLC40A1, ↓SPATA7, ↓↓ST3GAL5, testosterone, ↑TMEM144, ↓↓VAT1L                 | 19 | 14 | Molecular Transport, Inflammatory Disease, Neurological Disease                           | KISS1R(M/1), testosterone(M/1), TGFB1(2), beta-estradiol(2)                                                                                                                                                                                |

|     |                                                                                                                                                                                                                                                                                                                           |    |    |                                                                                        |                                                                              |
|-----|---------------------------------------------------------------------------------------------------------------------------------------------------------------------------------------------------------------------------------------------------------------------------------------------------------------------------|----|----|----------------------------------------------------------------------------------------|------------------------------------------------------------------------------|
| N11 | ABCA1, ↓↓ABCA8, ACOT13, ↑↑ALG6, ↓↓CCM2L, CDH1, CUTA, DLG4, ↓↓DYNC111, DYNLRB2, ↓↓DYNLT3, ↓FANK1, ↓↓FRMD5, GLOD4, IL2, IL12 (complex), ↓↓JAKMIP2, JUN, LNX1, ↓↓MCC, MLEC, MYPN, NAPSA, ↑↑NEAT1, ↓↓PDZRN3, PKD1, POLG, PUS7, RASAL2, REXO2, TMA16, ↓TMX1, TSFM, UBC, ↓ZBTB8A                                                | 18 | 13 | Cancer, Organismal Injury and Abnormalities, Tissue Morphology                         | PKD1(M/2), IL13(2)                                                           |
| N12 | AKAP3, ↑↑AKAP4, ASPM, ↓C9orf91, ↑↑CPEB4, CYB5B, ↑↑DPP8, DRG1, ↑↑DST, DTX3L, ELAVL1, ETV6, GLIPR2, IER2, IFNG, ↓IKBIP, ↑↑KAT6A, ↓KCTD1, MEAF6, MGST3, ↓MSANTD3, ↑↑NOV, NUPR1, ↓PDE7B, PFDN1, PUS7, RAB38, RANBP6, RAVER1, RERE, ↓↓RFTN2, SNX3, SUMO2, ↓SYNDIG1, TOB1                                                       | 18 | 13 | Cell Signaling, Organ Morphology, Organismal Development                               | SUMO2(M/1), NUPR1(M/3)                                                       |
| N13 | 26s Proteasome, Actin, ↓↓ACTN2, ↓AJUBA, ↓ASAP1, ↓ASAP2, ↓CDR2, CIT, Ck2, CLIC5, EGFR ligand, Focal adhesion kinase, ↑↑GPR116, ↑↑HNRNPD, ↓↓LHCGR, LPAR1, Mapk, Mmp, p85 (pik3r), ↑↑PABPC1, PAIP2, PALLD, Pka, PLC, Rac, Ras homolog, RNA polymerase II, ↓↓SHISA2, ↑↑SND1, SRC (family), SSTR4, ↓TES, TRHR, Ubiquitin, Vegf | 16 | 12 | Organ Morphology, Reproductive System Development and Function, Developmental Disorder | ↓↓LHCGR(M/1), Vegf(M/2), beta-estradiol(2), TNF(2), PRL(2), MYC(2), GATA4(2) |
| N14 | FIGLA, ↓LRRC27                                                                                                                                                                                                                                                                                                            | 2  | 1  | Cell Cycle, Cell Death and Survival, Endocrine System Disorders                        |                                                                              |

---

The numbers in parenthesis next to regulators' gene IDs in the last column signify how many molecules in those networks the regulators are affecting (e.g. Vegf regulates five molecules in Network 1). Letter (M/...) signifies that the regulators are also member of those networks, e.g. Vegf is also a member of network 1. Symbols for regulators with increased (or decreased) expression and fold-change $\geq$ 2 are preceded with ↑↑ (or ↓↓). Symbols for genes with increased (or decreased) expression and fold-change $<$ 2 are preceded with ↑ (or ↓).

---
