# Supplementary material
Source: PubMed Central journal article supplement (PMC4385968)
Supplement: tableS8.pdf [file tableS8.pdf]

Table S8. Upstream regulators and their potential targets in summer cumulus cells

| Upstream Regulator                                                                                                                                           | Molecule Type                     | Predicted<br>Activation /<br>Inhibition<br>State | Activation<br>z-score | p-value of<br>overlap | Target molecules in dataset                                                                                                  |
|--------------------------------------------------------------------------------------------------------------------------------------------------------------|-----------------------------------|--------------------------------------------------|-----------------------|-----------------------|------------------------------------------------------------------------------------------------------------------------------|
| <b>Upstream regulators showing significantly different expression in summer cumulus cells</b>                                                                |                                   |                                                  |                       |                       |                                                                                                                              |
| ↑↑FOXO1                                                                                                                                                      | transcription regulator           |                                                  | -0.600                | 2.30×10 <sup>-2</sup> | ↓↓ANGPT2, ↓↓CTSV, ↓↓DAPK1, ↓↓DDIT4, ↑↑FOXO1, ↓↓LHCGR, ↓↓MMP1                                                                 |
| ↓↓LHCGR                                                                                                                                                      | G-protein coupled receptor        |                                                  |                       | 3.06×10 <sup>-5</sup> | ↑↑ADAMTS1, ↓↓CTSV, ↓↓CYP19A1, ↓↓LHCGR, ↓↓TNFAIP6                                                                             |
| ↓CAV1                                                                                                                                                        | transmembrane receptor            |                                                  |                       | 1.20×10 <sup>-4</sup> | ↓CAV1, ↓CAV2, ↓↓MMP1, ↓SLC12A2, ↑↑SLC20A1, ↑↑SLC7A2, ↑↑TFPI                                                                  |
| ↓mir-210                                                                                                                                                     | microRNA                          |                                                  |                       | 8.49×10 <sup>-3</sup> | ↓CDCA7L, ↑COL4A2, ↓ELK3, ↓↓LHFP                                                                                              |
| ↓CAV2                                                                                                                                                        | other                             |                                                  |                       | 9.63×10 <sup>-3</sup> | ↓CAV1                                                                                                                        |
| ↓SKP2                                                                                                                                                        | other                             |                                                  |                       | 1.28×10 <sup>-2</sup> | ↓SKP2, ↓↓SLC2A1                                                                                                              |
| ↓↓SAP30                                                                                                                                                      | transcription regulator           |                                                  |                       | 1.92×10 <sup>-2</sup> | ↓↓LHCGR                                                                                                                      |
| ↑↑BMPR1B                                                                                                                                                     | kinase                            |                                                  |                       | 2.22×10 <sup>-2</sup> | ↓↓CYP19A1, ↓POSTN                                                                                                            |
| ↑TOX                                                                                                                                                         | other                             |                                                  |                       | 2.86×10 <sup>-2</sup> | ↑↑FOXO1                                                                                                                      |
| ↑↑HPGD                                                                                                                                                       | enzyme                            |                                                  |                       | 2.86×10 <sup>-2</sup> | ↓↓CYP19A1                                                                                                                    |
| ↑↑RORA                                                                                                                                                       | ligand-dependent nuclear receptor |                                                  |                       | 2.92×10 <sup>-2</sup> | ↓BHMT, ↓↓CYP19A1, ↑CYP2B6, ↑↑HPGD, ↑↑RORA                                                                                    |
| ↓SMAD7                                                                                                                                                       | transcription regulator           |                                                  |                       | 3.21×10 <sup>-2</sup> | ↑↑BMPR1B, ↑↑DCN, ↓↓MMP1, ↓SMAD7                                                                                              |
| ↓HMGB1                                                                                                                                                       | transcription regulator           |                                                  |                       | 3.23×10 <sup>-2</sup> | ↓HMGB1, ↓↓MMP1, ↓SMAD7                                                                                                       |
| <b>Upstream regulators (not showing significantly different expression in summer cumulus cells) with predicted activation/inhibition state ( z &gt;1.96)</b> |                                   |                                                  |                       |                       |                                                                                                                              |
| AGT                                                                                                                                                          | growth factor                     | Inhibited                                        | -2.757                | 9.37×10 <sup>-4</sup> | ↓↓ANGPT2, ↑↑ANK3, ↓↓ATP2B1, ↓CAV1, ↓↓COX4I1, ↓↓CYP19A1, ↓POSTN, ↓↓SLC2A1, ↓SMAD7, ↑↑TFPI, ↓VEGFC, ↓ZEB1                      |
| ERBB2                                                                                                                                                        | kinase                            | Inhibited                                        | -2.754                | 2.50×10 <sup>-3</sup> | ↓↓BNIP3, ↓↓COL5A1, ↓↓CRIP1, ↓ELK3, ↑↑FOXO1, ↓IRX3, ↓↓MMP1, ↓SKP2, ↓↓SLC2A1, ↓SMAD7, ↓TYMS, ↓VEGFC, ↑↑VWF, ↓ZEB1              |
| OSM                                                                                                                                                          | cytokine                          | Inhibited                                        | -2.402                | 1.67×10 <sup>-3</sup> | ↑↑ADAMTS1, ↑↑AKR1C1/AKR1C2, ↓↓ANGPT2, ↑↑BTC, ↓↓CTSV, ↓↓CYP19A1, ↓↓DAPK1, ↓↓MMP1, ↑MT1X, ↓↓PYGL, ↑↑RORA, ↑↑SYNE1, ↑↑TNFRSF11A |
| testosterone                                                                                                                                                 | chemical - endogenous mammalian   | Inhibited                                        | -2.361                | 9.50×10 <sup>-2</sup> | ↓↓ATP2B1, ↓CAV1, ↓↓CYP19A1, ↓↓LHCGR, ↓RIMS2, ↑TMEM144                                                                        |
| HIF1A                                                                                                                                                        | transcription regulator           | Inhibited                                        | -2.271                | 1.17×10 <sup>-5</sup> | ↑↑ADAMTS1, ↓↓BNIP3, ↓CAV1, ↓EGLN1, ↓↓ENO2, ↑↑FAM13A, ↓↓MMP1, ↑↑NOV, ↓PFKFB4, ↓↓SLC2A1, ↓SMAD7, ↓↓STC2, ↓VEGFC                |

|          |                             |           |        |                       |                                                                                                  |
|----------|-----------------------------|-----------|--------|-----------------------|--------------------------------------------------------------------------------------------------|
| STAT5B   | transcription regulator     | Inhibited | -2.236 | $4.48 \times 10^{-3}$ | ↑↑AKR1C1/AKR1C2, ↓ASAP1, ↑CYP2B6, ↓RASD1, ↑↑TNFRSF11A, ↑TOX                                      |
| ARNT2    | transcription regulator     | Inhibited | -2.236 | $4.95 \times 10^{-2}$ | ↓↓ANGPT2, ↓COL12A1, ↓POSTN, ↓↓RYR2, ↓↓SLC2A1                                                     |
| P38 MAPK | group                       | Inhibited | -2.229 | $1.24 \times 10^{-2}$ | ↓↓BNIP3, ↓CAV1, ↓↓CYP19A1, ↑↑MAP4K4, ↓↓MMP1, ↓POSTN, ↑↑RGS4, ↓VEGFC                              |
| CD38     | enzyme                      | Inhibited | -2.219 | $1.73 \times 10^{-2}$ | ↓↓BNIP3, ↓↓CRIP1, ↓EGLN1, ↓↓SAP30, ↓↓SLC2A1                                                      |
| FGF1     | growth factor               | Inhibited | -2.156 | $5.15 \times 10^{-3}$ | ↑ACPL2, ↓POSTN, ↑↑PRICKLE1, ↑↑SLC7A2, ↓VEGFC                                                     |
| WNT3A    | cytokine                    | Activated | 2.132  | $7.87 \times 10^{-4}$ | ↑ACPL2, ↑↑DCN, ↓↓DDIT4, ↓IRX3, ↑↑KCTD12, ↑MT1X, ↑↑PRICKLE1, ↑↑SLC7A2                             |
| LY294002 | chemical - kinase inhibitor | Activated | 2.045  | $1.83 \times 10^{-2}$ | ↑↑ADAMTS1, ↑↑AKR1C1/AKR1C2, ↓↓ATP2B1, ↓↓CYP19A1, ↓↓LHCGR, ↓POSTN, ↓↓SLC2A1, ↓TYMS, ↓VEGFC, ↓ZEB1 |
| ERK1/2   | group                       | Inhibited | -2.025 | $2.62 \times 10^{-4}$ | ↓↓ANGPT2, ↓BHMT, ↓CAV1, ↓↓CTSV, ↓↓CYP19A1, ↓↓DAPK1, ↓↓MMP1, ↓PFKFB4, ↓POSTN, ↓ZEB1               |
| COMMD1   | transporter                 | Activated | 2.000  | $3.59 \times 10^{-5}$ | ↓↓BNIP3, ↓↓DDIT4, ↓EGLN1, ↓↓STC2                                                                 |
| NEDD9    | other                       | Inhibited | -2.000 | $3.87 \times 10^{-4}$ | ↓↓ANKRD37, ↓↓BNIP3, ↓↓DDIT4, ↓↓SLC2A1                                                            |
| Ras      | group                       | Inhibited | -2.000 | $2.97 \times 10^{-2}$ | ↓↓BNIP3, ↓CAV1, ↓↓MMP1, ↓ZEB1                                                                    |
| VHL      | transcription regulator     | Activated | 1.987  | $2.44 \times 10^{-5}$ | ↓↓BNIP3, ↓CAV1, ↓↓ENO2, ↓GLCE, ↓SKP2, ↓↓SLC2A1, ↓TYMS, ↓VEGFC                                    |
| PTGS2    | enzyme                      | Inhibited | -1.985 | $4.17 \times 10^{-2}$ | ↓↓ANGPT2, ↓↓CYP19A1, ↓↓TNFAIP6, ↓VEGFC                                                           |
| H89      | chemical - kinase inhibitor | Activated | 1.964  | $3.37 \times 10^{-2}$ | ↓↓CYP19A1, ↓↓LHCGR, ↓↓MMP1, ↓↓TNFAIP6                                                            |

---

**Upstream regulators (not showing significantly different expression in summer cumulus cells) with uncharacterized activation/inhibition state ( $|z| < 1.96$ )**

---

|                   |                                   |  |        |                       |                                                                                                                                                                      |
|-------------------|-----------------------------------|--|--------|-----------------------|----------------------------------------------------------------------------------------------------------------------------------------------------------------------|
| Other             |                                   |  |        |                       |                                                                                                                                                                      |
| INHBA             | growth factor                     |  | -1.958 | $7.96 \times 10^{-2}$ | ↓↓CYP19A1, ↓HMGB1, ↓↓LHCGR, ↓SMAD7                                                                                                                                   |
| PPARG             | ligand-dependent nuclear receptor |  | -1.858 | $3.48 \times 10^{-2}$ | ↑↑ALDH9A1, ↓CAV1, ↓CAV2, ↓↓CYP19A1, ↓↓ENO2, ↓↓PYGL, ↓↓SLC2A1, ↓↓UGT1A9 (includes others)                                                                             |
| estrogen receptor | group                             |  | 1.803  | $3.47 \times 10^{-4}$ | ↓CAV1, ↓CAV2, ↓↓COL12A1, ↑COL4A2, ↓↓COL5A1, ↑CYP2B6, ↓↓MMP1, ↓VEGFC, ↓ZEB1                                                                                           |
| E2F1              | transcription regulator           |  | -1.718 | $9.62 \times 10^{-3}$ | ↓↓ANGPT2, ↓↓BNIP3, ↓CAV1, ↓↓COX4I1, ↓↓ENO2, ↑↑FOXO1, ↓HMGB1, ↓↓MMP1, ↓TYMS                                                                                           |
| EGFR              | kinase                            |  | -1.698 | $1.09 \times 10^{-3}$ | ↓↓ANGPT2, ↑↑BTC, ↓CAV1, ↓↓CYP19A1, ↓↓MMP1, ↓POSTN, ↓↓PTGIS, ↓↓TNFAIP6, ↓ZEB1                                                                                         |
| IL1B              | cytokine                          |  | -1.697 | $7.01 \times 10^{-4}$ | ↑ACPP, ↑↑ADAMTS1, ↓↓CYP19A1, ↑CYP2B6, ↑↑DCN, ↓↓DDIT4, ↑↑FOXO1, ↓HMGB1, ↓MAP2K6, ↓↓MMP1, ↓↓PTGIS, ↑↑RORA, ↑↑SLC20A1, ↓↓SLC2A1, ↓SMAD7, ↓↓TNFAIP6, ↑↑TNFRSF11A, ↓VEGFC |

|                     |                                   |        |                       |                                                                                                                                                       |
|---------------------|-----------------------------------|--------|-----------------------|-------------------------------------------------------------------------------------------------------------------------------------------------------|
| ESR2                | ligand-dependent nuclear receptor | -1.680 | 8.13x10 <sup>-4</sup> | ↓CAV1, ↓↓CYP19A1, ↓↓ELAVL2, ↑↑HPGD, ↓↓LHCGR, ↓↓MMP1, ↓↓PTGIS, ↓SKP2                                                                                   |
| NKX2-3              | transcription regulator           | -1.633 | 1.56x10 <sup>-2</sup> | ↓↓ANGPT2, ↓↓ANKRD37, ↓CHST7, ↓↓DCLK1, ↓POSTN, ↓SMAD7                                                                                                  |
| EDN1                | cytokine                          | -1.542 | 9.66x10 <sup>-3</sup> | ↑↑ANXA4, ↓↓COL5A1, ↓↓MMP1, ↓↓SLC2A1, ↓VEGFC, ↑↑VWF                                                                                                    |
| GATA4               | transcription regulator           | -1.485 | 4.27x10 <sup>-3</sup> | ↓↓ACTN2, ↓↓CYP19A1, ↓↓LHCGR, ↓POSTN, ↓↓RYR2                                                                                                           |
| IGF1                | growth factor                     | -1.453 | 4.44x10 <sup>-4</sup> | ↑↑AKR1C1/AKR1C2, ↓↓ANGPT2, ↓↓CYP19A1, ↓↓DCLK1, ↓↓DDIT4, ↑↑FOXO1, ↓HMGB1, ↓↓LHCGR, ↓↓MMP1, ↑↑SLC20A1, ↓↓SLC2A1, ↓VEGFC                                 |
| androgen            | chemical - other                  | 1.408  | 3.96x10 <sup>-3</sup> | ↓↓COL12A1, ↑COL4A2, ↓↓CTSV, ↓↓ENO2, ↓SKP2, ↓VEGFC                                                                                                     |
| EP300               | transcription regulator           | -1.387 | 3.93x10 <sup>-2</sup> | ↓↓CYP19A1, ↑↑FOXO1, ↓↓MMP1, ↓SKP2, ↓SMAD7                                                                                                             |
| AHR                 | ligand-dependent nuclear receptor | -1.381 | 2.75x10 <sup>-4</sup> | ↓↓ATP2B1, ↓↓COL12A1, ↑↑COL14A1, ↑COL4A2, ↓↓COL5A1, ↓↓CYP19A1, ↑CYP2B6, ↑↑DCN, ↓HMGB1, ↓INSIG2, ↓VEGFC                                                 |
| FSH                 | complex                           | -1.365 | 2.27x10 <sup>-7</sup> | ↑ACPP, ↑↑ADAMTS1, ↓↓ATP2B1, ↑↑BMPR1B, ↑↑BTC, ↓↓CYP19A1, ↓↓DAPK1, ↓↓LHCGR, ↑↑MAP4K4, ↑MT1X, ↑↑RGS4, ↓↓RGS7, ↓↓SLC2A1, ↓SMAD7, ↓↓TNFAIP6, ↓VEGFC, ↓ZEB1 |
| SB203580            | chemical - kinase inhibitor       | 1.287  | 5.88x10 <sup>-3</sup> | ↑↑ADAMTS1, ↓MAP2K6, ↓↓MMP1, ↓POSTN, ↓↓RGS7, ↑↑SLC20A1, ↓↓STC2, ↓↓TNFAIP6, ↓VEGFC                                                                      |
| FGF2                | growth factor                     | -1.283 | 2.78x10 <sup>-5</sup> | ↓↓ANGPT2, ↓CAV1, ↑↑DCN, ↑↑FOXO1, ↓HMGB1, ↓↓MMP1, ↑↑NOV, ↑↑SLC20A1, ↓↓SLC2A1, ↑↑TFPI, ↓VEGFC, ↑↑VWF, ↓ZEB1                                             |
| dihydrotestosterone | chemical - endogenous mammalian   | 1.246  | 4.38x10 <sup>-3</sup> | ↑ACPP, ↑↑ADAMTS1, ↓ASAP2, ↓CANX, ↓↓CYP19A1, ↑↑FOXO1, ↑↑HPGD, ↓↓MMP1, ↓POSTN, ↓↓SLC2A1, ↑↑TFPI, ↓ZEB1                                                  |
| heparin             | chemical - endogenous mammalian   | 1.209  | 4.08x10 <sup>-4</sup> | ↓↓LHCGR, ↓↓MMP1, ↓↓SLC2A1, ↑↑TFPI, ↓↓TNFAIP6                                                                                                          |
| PI3K (complex)      | complex                           | -1.195 | 4.99x10 <sup>-2</sup> | ↑↑FOXO1, ↓↓LHCGR, ↓↓MMP1, ↓POSTN, ↓SKP2, ↑↑TNFRSF11A                                                                                                  |
| progesterone        | chemical - endogenous mammalian   | 1.192  | 4.18x10 <sup>-4</sup> | ↑ACPP, ↑↑ADAMTS1, ↓BCAT1, ↓CAV1, ↓↓CTSV, ↓↓CYP19A1, ↑CYP2B6, ↑↑FOXO1, ↓↓KCNA1, ↓↓LHCGR, ↓↓MMP1, ↓POSTN, ↓SKP2, ↓ZEB1                                  |
| HGF                 | growth factor                     | -1.149 | 9.12x10 <sup>-4</sup> | ↑↑ADAMTS1, ↓↓ANGPT2, ↑↑ANK3, ↓CAV1, ↑CYP2B6, ↑↑GPR116, ↓GUCY1B3, ↓↓MMP1, ↓SKP2, ↑↑SLC20A1, ↓↓TNFAIP6, ↓VEGFC, ↓ZEB1                                   |
| CEBPB               | transcription regulator           | -1.129 | 3.32x10 <sup>-3</sup> | ↓BHMT, ↓↓CYP19A1, ↓↓DAPK1, ↑↑DCN, ↓↓LHCGR, ↓↓MMP1, ↑↑RGS4, ↑↑RORA, ↓SLC12A2, ↓↓TNFAIP6                                                                |

|                                        |                               |        |                       |                                                                                                                                                                                                                                                                                                                                  |
|----------------------------------------|-------------------------------|--------|-----------------------|----------------------------------------------------------------------------------------------------------------------------------------------------------------------------------------------------------------------------------------------------------------------------------------------------------------------------------|
| PDGF BB                                | complex                       | -1.124 | $3.44 \times 10^{-2}$ | ↓↓ATP2B1, ↓CAV2, ↑↑DCN, ↓GUCY1B3, ↓↓MMP1, ↓POSTN, ↑↑SYNE1                                                                                                                                                                                                                                                                        |
| TGFB3                                  | growth factor                 | -1.109 | $1.97 \times 10^{-3}$ | ↓↓COL5A1, ↓↓CYP19A1, ↓↓MMP1, ↑↑NOV, ↓SMAD7                                                                                                                                                                                                                                                                                       |
| ERG                                    | transcription regulator       | -1.067 | $5.84 \times 10^{-3}$ | ↓↓DYNC11I1, ↓↓GUCY1A3, ↓GUCY1B3, ↓HMGB1, ↓↓MMP1, ↑↑VWF                                                                                                                                                                                                                                                                           |
| TP63                                   | transcription regulator       | 1.042  | $7.21 \times 10^{-4}$ | ↑↑ADAMTS1, ↑↑COL4A3, ↓↓COL5A1, ↓↓DDIT4, ↑↑DST, ↓↓PELP1, ↓POSTN, ↓↓UGT1A9 (includes others), ↓ZEB1                                                                                                                                                                                                                                |
| BMP15                                  | growth factor                 | 1.000  | $1.80 \times 10^{-5}$ | ↑↑BTC, ↓↓CYP19A1, ↓↓LHCGR, ↓↓TNFAIP6                                                                                                                                                                                                                                                                                             |
| CTGF                                   | growth factor                 | 1.000  | $2.22 \times 10^{-4}$ | ↑↑ADAMTS1, ↑COL4A2, ↑↑DCN, ↓↓LHCGR, ↓↓MMP1, ↑↑NOV                                                                                                                                                                                                                                                                                |
| SFTPA1                                 | transporter                   | -1.000 | $5.69 \times 10^{-3}$ | ↑↑AKR1C1/AKR1C2, ↓↓GUCY1A3, ↓RASD1, ↓TCEA3                                                                                                                                                                                                                                                                                       |
| COL18A1                                | other                         | 1.000  | $1.16 \times 10^{-2}$ | ↓↓DDIT4, ↓EGLN1, ↓↓MMP1, ↑↑VWF                                                                                                                                                                                                                                                                                                   |
| IKZF1                                  | transcription regulator       | 1.000  | $2.74 \times 10^{-2}$ | ↓AJUBA, ↑↑FOXO1, ↓↓LHFP, ↑↑VWF                                                                                                                                                                                                                                                                                                   |
| SMAD4                                  | transcription regulator       | -0.985 | $3.64 \times 10^{-2}$ | ↓↓ANGPT2, ↓↓DAPK1, ↓↓MMP1, ↓SMAD7, ↓↓TNFAIP6                                                                                                                                                                                                                                                                                     |
| TGFB1                                  | growth factor                 | -0.982 | $5.80 \times 10^{-7}$ | ↑ACPP, ↑↑AKR1C1/AKR1C2, ↓CAV1, ↓CAV2, ↑COL4A2, ↓↓COL5A1, ↓↓DAPK1, ↑↑DCN, ↓↓DDIT4, ↓EGLN1, ↓ELK3, ↑↑FAM110B, ↑↑FOXO1, ↓GGPS1, ↓GLCE, ↑↑HPGD, ↓↓LHCGR, ↓↓MMP1, ↑↑NOV, ↓↓OPN3, ↓POSTN, ↑RBMS3, ↑↑RORA, ↑↑SLC20A1, ↓↓SLC2A1, ↓SMAD7, ↓↓ST3GAL5, ↓↓STC2, ↓↓TNFAIP6, ↑↑TNFRSF11A, ↓↓TRIM9, ↓TYMS, ↓↓UST, ↓↓VAT1L, ↓VEGFC, ↑↑VWF, ↓ZEB1 |
| IL1                                    | group                         | -0.941 | $1.16 \times 10^{-3}$ | ↑↑ADAMTS1, ↑↑AKR1C1/AKR1C2, ↑CYP2B6, ↑↑DCN, ↓HMGB1, ↓MAP2K6, ↓↓MMP1, ↑↑RORA, ↓↓SLC2A1, ↓↓TNFAIP6                                                                                                                                                                                                                                 |
| IL17A                                  | cytokine                      | -0.930 | $7.28 \times 10^{-3}$ | ↓HMGB1, ↓↓MMP1, ↓↓SLC2A1, ↑↑TNFRSF11A, ↓VEGFC, ↑↑VWF                                                                                                                                                                                                                                                                             |
| TNF                                    | cytokine                      | -0.915 | $7.52 \times 10^{-4}$ | ↑↑ALCAM, ↓↓ANGPT2, ↓↓ATP2B1, ↓CAV1, ↑↑COL4A3, ↓↓CYP19A1, ↑↑DCN, ↓ELK3, ↓HMGB1, ↑↑HPGD, ↓↓LHCGR, ↓MAP2K6, ↓↓MMP1, ↑↑NOV, ↓NSG1, ↓POSTN, ↓RASD1, ↑↑RGS4, ↓↓RGS7, ↑↑SLC20A1, ↓↓SLC2A1, ↓SMAD7, ↑↑SND1, ↓↓ST3GAL5, ↑↑TFPI, ↓↓TNFAIP6, ↑↑TNFRSF11A, ↓VEGFC                                                                            |
| SMAD3                                  | transcription regulator       | -0.876 | $3.71 \times 10^{-2}$ | ↓↓CYP19A1, ↓↓DAPK1, ↓↓MMP1, ↑↑NOV, ↓SMAD7                                                                                                                                                                                                                                                                                        |
| benzyloxycarbonyl-Leu-Leu-Leu aldehyde | chemical - protease inhibitor | 0.859  | $1.54 \times 10^{-2}$ | ↑↑AKR1C1/AKR1C2, ↑↑DCN, ↑↑FOXO1, ↓↓MMP1, ↑↑RGS4, ↓↓RGS7, ↓SKP2                                                                                                                                                                                                                                                                   |

|                  |                                   |        |                       |                                                                                                                                                                                                                                                                                                     |
|------------------|-----------------------------------|--------|-----------------------|-----------------------------------------------------------------------------------------------------------------------------------------------------------------------------------------------------------------------------------------------------------------------------------------------------|
| PD98059          | chemical - kinase inhibitor       | 0.858  | $2.07 \times 10^{-3}$ | <p>↓↓ANGPT2, ↓↓BNIP3, ↓CAV1, ↓↓ENO2, ↑↑FAM13A, ↑↑HPGD, ↓↓MMP1, ↑↑PABPC1, ↓POSTN, ↓↓SLC26A2, ↓↓SLC2A1, ↑↑TNFRSF11A, ↓VEGFC</p>                                                                                                                                                                       |
| MYC              | transcription regulator           | -0.850 | $1.88 \times 10^{-3}$ | <p>↑↑ADAMTS1, ↑↑ALCAM, ↓↓ANGPT2, ↑↑ANXA4, ↓BCAT1, ↓CANX, ↓CAV1, ↑↑COL14A1, ↑COL4A2, ↓↓COL5A1, ↓↓CRIP1, ↓↓CTSV, ↓EGLN1, ↑↑HNRNPD, ↓SKP2, ↓↓SLC2A1, ↓TES, ↓TYMS</p>                                                                                                                                   |
| prostaglandin E2 | chemical - endogenous mammalian   | -0.844 | $6.84 \times 10^{-3}$ | <p>↑↑ADAMTS1, ↓↓ANGPT2, ↓↓CYP19A1, ↑↑DCN, ↑↑FOXO1, ↓↓MMP1, ↓↓TNFAIP6, ↓VEGFC</p>                                                                                                                                                                                                                    |
| dinoprost        | chemical - endogenous mammalian   | 0.822  | $7.89 \times 10^{-4}$ | <p>↑↑AKR1C1/AKR1C2, ↑↑ANXA4, ↓↓CYP19A1, ↓↓LHCGR, ↓↓MMP1</p>                                                                                                                                                                                                                                         |
| CGA              | other                             | -0.790 | $1.23 \times 10^{-4}$ | <p>↑↑ADAMTS1, ↓↓CTSV, ↓↓LHCGR, ↓SKP2</p>                                                                                                                                                                                                                                                            |
| ESR1             | ligand-dependent nuclear receptor | 0.760  | $3.13 \times 10^{-4}$ | <p>↓CAV1, ↓CAV2, ↓↓CYP19A1, ↓↓DDIT4, ↓↓GUCY1A3, ↓GUCY1B3, ↓↓LHCGR, ↓↓MMP1, ↑↑SLC7A2, ↓↓STC2, ↓↓TNFAIP6, ↓VEGFC</p>                                                                                                                                                                                  |
| D-glucose        | chemical - endogenous mammalian   | -0.758 | $6.98 \times 10^{-4}$ | <p>↓↓ANGPT2, ↓↓ATP2B1, ↓BCAT1, ↓CANX, ↓CAV1, ↓↓CTSV, ↑↑DCN, ↓↓DDIT4, ↓HMGB1, ↓↓MMP1, ↓PON2, ↓↓PTGIS, ↓↓SLC2A1</p>                                                                                                                                                                                   |
| PGR              | ligand-dependent nuclear receptor | 0.732  | $2.85 \times 10^{-3}$ | <p>↑↑ADAMTS1, ↓↓CYP19A1, ↑↑DST, ↑↑HPGD, ↓POSTN, ↓ZEB1</p>                                                                                                                                                                                                                                           |
| NUPR1            | transcription regulator           | -0.677 | $8.78 \times 10^{-3}$ | <p>↑↑ANK3, ↓↓BNIP3, ↓C9orf91, ↓EGLN1, ↓↓ENO2, ↓MSANTD3, ↑MT1X, ↓PFKFB4, ↓↓RFTN2, ↓SKP2, ↓↓SLC2A1</p>                                                                                                                                                                                                |
| Lh               | complex                           | -0.669 | $5.08 \times 10^{-6}$ | <p>↑ACPP, ↑↑ADAMTS1, ↓↓ATP2B1, ↑↑BTC, ↓↓CYP19A1, ↓↓DAPK1, ↓↓LHCGR, ↑↑MAP4K4, ↑↑RGS4, ↓↓RGS7, ↓↓TNFAIP6, ↓VEGFC</p>                                                                                                                                                                                  |
| Alpha catenin    | group                             | 0.647  | $7.62 \times 10^{-4}$ | <p>↑↑ADAMTS1, ↓↓COL5A1, ↓↓CTSV, ↓ELK3, ↑↑NOV, ↓↓TNFAIP6</p>                                                                                                                                                                                                                                         |
| IL6              | cytokine                          | -0.623 | $1.29 \times 10^{-2}$ | <p>↑↑ADAMTS1, ↓CES1, ↓↓COX4I1, ↓↓CYP19A1, ↑CYP2B6, ↑↑DCN, ↓↓ENO2, ↑↑HPGD, ↓↓MMP1, ↑↑RORA, ↓SLC12A2, ↓SMAD7, ↑↑TNFRSF11A</p>                                                                                                                                                                         |
| SIRT1            | transcription regulator           | -0.600 | $5.94 \times 10^{-3}$ | <p>↓↓BNIP3, ↓↓CYP19A1, ↓↓MMP1, ↑↑TFPI, ↓ZEB1</p>                                                                                                                                                                                                                                                    |
| beta-estradiol   | chemical - endogenous mammalian   | 0.584  | $6.30 \times 10^{-5}$ | <p>↑ACPP, ↓↓ATP2B1, ↑↑BMPR1B, ↓CAV1, ↓CAV2, ↓↓CYP19A1, ↑CYP2B6, ↓↓DCLK1, ↑↑DCN, ↓↓DDIT4, ↑↑FOXO1, ↓↓GUCY1A3, ↓GUCY1B3, ↑↑HNRNPD, ↑↑HPGD, ↓INSIG2, ↓↓KCNAB1, ↓↓LHCGR, ↓MAP2K6, ↓↓MMP1, ↓PON2, ↓↓PTGIS, ↓↓SAP30, ↓SKP2, ↓SLC12A2, ↑↑SLC20A1, ↓↓SLC2A1, ↑↑SLC7A2, ↓↓STC2, ↑↑TFPI, ↓↓TNFAIP6, ↓ZEB1</p> |

|              |                                 |        |                       |                                                                                                                                                                                                                                                          |
|--------------|---------------------------------|--------|-----------------------|----------------------------------------------------------------------------------------------------------------------------------------------------------------------------------------------------------------------------------------------------------|
| butyric acid | chemical - endogenous mammalian | 0.579  | $2.14 \times 10^{-3}$ | ↑COL4A2, ↓↓COL5A1, ↑CYP2B6, ↓↓DAPK1, ↓ELK3, ↓HMGB1, ↓↓PYGL, ↓SKP2, ↓↓SLC26A2, ↓↓SLC2A1, ↓TYMS                                                                                                                                                            |
| BMP2         | growth factor                   | -0.570 | $2.73 \times 10^{-3}$ | ↑↑BTC, ↓↓CYP19A1, ↑↑FOXO1, ↓↓LHCGR, ↓POSTN, ↓↓SLC26A2, ↓SMAD7                                                                                                                                                                                            |
| TP53         | transcription regulator         | 0.558  | $4.38 \times 10^{-2}$ | ↑↑ALDH9A1, ↑↑ANXA4, ↓↓BNIP3, ↓CAV1, ↑↑COL14A1, ↓↓DAPK1, ↓↓DDIT4, ↑↑FOXO1, ↓HMGB1, ↓IKBIP, ↑↑INPP4A, ↓MAP2K6, ↓↓MMP1, ↓POSTN, ↓PROSC, ↓↓SLC2A1, ↓SMAD7, ↓TYMS, ↓ZEB1                                                                                      |
| phosphate    | chemical - endogenous mammalian | 0.447  | $1.79 \times 10^{-3}$ | ↓↓COL5A1, ↑↑DCN, ↓POSTN, ↑↑SLC20A1, ↓↓STC2                                                                                                                                                                                                               |
| ERK          | group                           | -0.422 | $1.93 \times 10^{-2}$ | ↓CAV1, ↑↑FOXO1, ↑↑MAP4K4, ↓↓MMP1, ↑↑RGS4, ↓↓SLC2A1                                                                                                                                                                                                       |
| Tgf beta     | group                           | -0.410 | $6.00 \times 10^{-3}$ | ↑↑DCN, ↓↓MMP1, ↓POSTN, ↑↑RORA, ↓↓RYR2, ↓SMAD7, ↑↑TNFRSF11A                                                                                                                                                                                               |
| MYOD1        | transcription regulator         | -0.391 | $2.80 \times 10^{-2}$ | ↓POSTN, ↓SLC12A2, ↓↓SLC2A1, ↓SMAD7, ↓ZEB1                                                                                                                                                                                                                |
| SRC          | kinase                          | 0.314  | $6.93 \times 10^{-4}$ | ↓CAV1, ↓↓CTSV, ↓↓MMP1, ↓POSTN, ↑↑TNFRSF11A, ↓VEGFC                                                                                                                                                                                                       |
| tretinoin    | chemical - endogenous mammalian | -0.303 | $6.34 \times 10^{-3}$ | ↑↑ALDH9A1, ↓BHMT, ↑↑BMPR1B, ↓↓BNIP3, ↑↑BTC, ↓CES1, ↑COL4A2, ↑CYP2B6, ↑↑DCN, ↑↑HNRNPD, ↓↓MMP1, ↑↑NOV, ↓↓OLFM4, ↓POSTN, ↓↓PTGIS, ↓SKP2, ↓SLC12A2, ↑↑SLC7A2, ↓SMAD7, ↓↓TNFAIP6, ↑↑TNFRSF11A, ↓VEGFC, ↑↑VWF                                                  |
| IL13         | cytokine                        | 0.284  | $2.95 \times 10^{-3}$ | ↓↓CTSV, ↓↓DYNLT3, ↓↓JAKMIP2, ↓↓MMP1, ↑MT1X, ↓↓PID1, ↓↓RIN2, ↓SEPT11, ↑↑SLC7A2, ↑↑TNFRSF11A                                                                                                                                                               |
| IGFBP2       | other                           | 0.283  | $9.94 \times 10^{-4}$ | ↑↑COL14A1, ↓MRPL30, ↓POSTN, ↑RBMS3                                                                                                                                                                                                                       |
| CEBPA        | transcription regulator         | -0.274 | $6.44 \times 10^{-5}$ | ↑↑AKR1C1/AKR1C2, ↓BHMT, ↓↓COX4I1, ↓↓CYP19A1, ↑CYP2B6, ↓↓DYNLT3, ↑↑FOXO1, ↑↑HPGD, ↓↓LHCGR, ↓RNF144A, ↑↑RORA, ↓↓TNFAIP6, ↑↑TNFRSF11A                                                                                                                       |
| HNF4A        | transcription regulator         | 0.264  | $3.84 \times 10^{-2}$ | ↓AJUBA, ↑↑AKR1C1/AKR1C2, ↓BHMT, ↓CAV1, ↓CDCA7L, ↓CDK8, ↓↓CRIP1, ↑CYP2B6, ↓DCAF13, ↑↑FOXO1, ↓GLCE, ↓HMGB1, ↓MRPL44, ↑MT1X, ↓PFKFB4, ↑↑PKN2, ↓↓PYGL, ↓↓RHPN2, ↑↑RORA, ↓SKP2, ↓STYXL1, ↓↓TNFAIP6, ↑TOX, ↓TRMT61B, ↓TYMS, ↓↓UGT1A9 (includes others), ↓VEGFC |
| FOXO3        | transcription regulator         | -0.246 | $1.44 \times 10^{-2}$ | ↓↓BNIP3, ↓↓CTSV, ↓↓DDIT4, ↑↑FOXO1, ↓SKP2                                                                                                                                                                                                                 |
| CTNNB1       | transcription regulator         | -0.191 | $1.87 \times 10^{-2}$ | ↑↑ALCAM, ↑COL4A2, ↓↓CRIP1, ↓↓CYP19A1, ↓↓ENO2, ↓↓LHCGR, ↓↓MMP1, ↓SLC12A2, ↓↓SLC26A2, ↓SMAD7, ↓ZEB1                                                                                                                                                        |

|                        |                                 |        |                       |                                                                                                                                                   |
|------------------------|---------------------------------|--------|-----------------------|---------------------------------------------------------------------------------------------------------------------------------------------------|
| U0126                  | chemical - kinase inhibitor     | 0.187  | $3.35 \times 10^{-2}$ | ↓CAV1, ↓↓CYP19A1, ↑CYP2B6, ↑↑HPGD, ↑↑INPP4A, ↓↓MMP1, ↑↑PABPC1, ↓POSTN, ↓↓STC2                                                                     |
| Cg                     | complex                         | 0.169  | $4.02 \times 10^{-8}$ | ↑ACPP, ↑↑ADAMTS1, ↓BCAT1, ↓BHMT, ↑↑BTC, ↓↓CTSV, ↓↓CYP19A1, ↓↓ELAVL2, ↓ELK3, ↑↑HPGD, ↓↓LHCGR, ↓↓MMP1, ↑↑RGS4, ↑↑RORA, ↑↑SLC20A1, ↓↓TNFAIP6, ↓VEGFC |
| Vegf                   | group                           | -0.133 | $5.92 \times 10^{-4}$ | ↑↑ADAMTS1, ↓↓ANGPT2, ↑↑COL4A3, ↑↑GPR116, ↓GUCY1B3, ↓↓SHISA2, ↓SKP2, ↑↑SLC20A1, ↑↑TNFRSF11A, ↓VEGFC, ↑↑VWF, ↓ZEB1                                  |
| tyrphostin AG 1478     | chemical - kinase inhibitor     | -0.132 | $3.78 \times 10^{-3}$ | ↑↑BTC, ↓CAV1, ↓↓MMP1, ↓↓SLC2A1                                                                                                                    |
| F2                     | peptidase                       | 0.128  | $3.62 \times 10^{-2}$ | ↓↓ANGPT2, ↑CYP2B6, ↑↑DST, ↓SKP2, ↑↑TFPI, ↑↑VWF                                                                                                    |
| INHA                   | growth factor                   | 0.116  | $1.65 \times 10^{-2}$ | ↑↑ADAMTS1, ↓↓CYP19A1, ↓↓LHCGR, ↓SMAD7                                                                                                             |
| PTH                    | other                           | 0.076  | $1.56 \times 10^{-2}$ | ↑↑ADAMTS1, ↑↑ANK3, ↓↓MMP1, ↓POSTN, ↓SMAD7                                                                                                         |
| PRL                    | cytokine                        | 0.060  | $8.66 \times 10^{-4}$ | ↓CAV1, ↓↓COL5A1, ↓↓COX4I1, ↓↓CTSV, ↑↑DCN, ↓↓LHCGR, ↓RASD1, ↑↑SND1                                                                                 |
| PKD1                   | ion channel                     | 0.000  | $6.35 \times 10^{-3}$ | ↑↑ALG6, ↓BCAT1, ↑↑FOXO1, ↓↓JAKMIP2, ↑↑SYNE1, ↑↑VWF                                                                                                |
| Akt                    | group                           | 0.000  | $1.89 \times 10^{-2}$ | ↓↓COX4I1, ↓↓CYP19A1, ↑↑HPGD, ↓↓LHCGR, ↓SKP2, ↑↑TNFRSF11A                                                                                          |
| SYVN1                  | transporter                     | 0.000  | $3.99 \times 10^{-2}$ | ↓BCAT1, ↑↑SLC20A1, ↓↓SLC2A1, ↑↑SLC7A2                                                                                                             |
| 5'-methylthioadenosine | chemical - endogenous mammalian |        | $1.82 \times 10^{-4}$ | ↓↓GUCY1A3, ↓GUCY1B3, ↓↓MMP1                                                                                                                       |
| TAZ                    | enzyme                          |        | $2.81 \times 10^{-4}$ | ↑↑ADAMTS1, ↓CAV1, ↓CAV2, ↑↑RGS4, ↓↓SORBS2                                                                                                         |
| leupeptin              | chemical - protease inhibitor   |        | $3.68 \times 10^{-4}$ | ↓CAV1, ↑↑FOXO1, ↑↑RGS4                                                                                                                            |
| phenylacetate          | chemical - endogenous mammalian |        | $5.47 \times 10^{-4}$ | ↓CAV1, ↓CAV2                                                                                                                                      |
| CTSS                   | peptidase                       |        | $6.46 \times 10^{-4}$ | ↑COL4A2, ↑↑COL4A3, ↓↓CTSV                                                                                                                         |
| EPAS1                  | transcription regulator         |        | $8.07 \times 10^{-4}$ | ↓↓ANGPT2, ↓↓BNIP3, ↓CAV1, ↓↓ENO2, ↑↑FAM13A, ↓↓SLC2A1, ↓↓STC2                                                                                      |
| VAV3                   | cytokine                        |        | $1.35 \times 10^{-3}$ | ↑↑BTC, ↓CAV1, ↓CAV2                                                                                                                               |
| GJA1                   | transporter                     |        | $1.53 \times 10^{-3}$ | ↑↑FOXO1, ↑↑NOV, ↓SKP2                                                                                                                             |
| TERT                   | enzyme                          |        | $1.58 \times 10^{-3}$ | ↓ASAP1, ↓↓BNIP3, ↓CAV1, ↓ELK3, ↓HMGB1, ↓↓MMP1                                                                                                     |
| ZNF100                 | other                           |        | $1.88 \times 10^{-3}$ | ↓MRPL30, ↓POSTN                                                                                                                                   |
| ZNF85                  | transcription regulator         |        | $1.88 \times 10^{-3}$ | ↓MRPL30, ↓POSTN                                                                                                                                   |
| ZNF254                 | other                           |        | $1.88 \times 10^{-3}$ | ↓MRPL30, ↓POSTN                                                                                                                                   |
| RASSF8                 | other                           |        | $1.88 \times 10^{-3}$ | ↓MRPL30, ↓POSTN                                                                                                                                   |

|                |                                 |                       |                                                                          |
|----------------|---------------------------------|-----------------------|--------------------------------------------------------------------------|
| ZNF431         | other                           | $1.88 \times 10^{-3}$ | ↓MRPL30, ↓POSTN                                                          |
| ZNF708         | other                           | $1.88 \times 10^{-3}$ | ↓MRPL30, ↓POSTN                                                          |
| ZNF665         | other                           | $1.88 \times 10^{-3}$ | ↓MRPL30, ↓POSTN                                                          |
| ZNF528         | other                           | $1.88 \times 10^{-3}$ | ↓MRPL30, ↓POSTN                                                          |
| ZNF43          | other                           | $1.88 \times 10^{-3}$ | ↓MRPL30, ↓POSTN                                                          |
| ZNF429         | other                           | $1.88 \times 10^{-3}$ | ↓MRPL30, ↓POSTN                                                          |
| GNA11          | enzyme                          | $1.88 \times 10^{-3}$ | ↑↑ADAMTS1, ↓↓CTSV                                                        |
| NPR1           | enzyme                          | $1.94 \times 10^{-3}$ | ↓↓GUCY1A3, ↓GUCY1B3, ↑↑RGS4                                              |
| TRG            | other                           | $2.49 \times 10^{-3}$ | ↓CAV1, ↓CAV2                                                             |
| ZNF91          | other                           | $2.49 \times 10^{-3}$ | ↓MRPL30, ↓POSTN                                                          |
| HOXB5          | transcription regulator         | $2.49 \times 10^{-3}$ | ↓↓ANGPT2, ↓↓MMP1                                                         |
| pepstatin      | chemical - protease inhibitor   | $2.49 \times 10^{-3}$ | ↓CAV1, ↓↓STC2                                                            |
| GDF9           | growth factor                   | $2.67 \times 10^{-3}$ | ↓↓CYP19A1, ↓↓LHCGR, ↓↓TNFAIP6                                            |
| IGF2R          | transmembrane receptor          | $3.18 \times 10^{-3}$ | ↓MRPL30, ↓POSTN                                                          |
| LONP1          | peptidase                       | $3.95 \times 10^{-3}$ | ↓↓MT-ATP8, ↓↓MT-ND4L                                                     |
| RBL1           | transcription regulator         | $4.21 \times 10^{-3}$ | ↓↓LHCGR, ↓SKP2, ↓TYMS, ↓ZEB1                                             |
| RET            | kinase                          | $4.27 \times 10^{-3}$ | ↑↑ANXA4, ↓↓CTSV, ↑↑DCN, ↓↓MMP1, ↑↑NOV                                    |
| SUMO3          | other                           | $4.59 \times 10^{-3}$ | ↓CAV1, ↓CAV2, ↑↑NOV                                                      |
| SMARCB1        | transcription regulator         | $4.62 \times 10^{-3}$ | ↓↓BNIP3, ↑↑COL14A1, ↓↓DAPK1, ↓↓MMP1, ↓POSTN, ↓SKP2                       |
| L-histidine    | chemical - endogenous mammalian | $4.79 \times 10^{-3}$ | ↓↓DDIT4, ↑↑HNRNPD                                                        |
| SYK/ZAP        | group                           | $4.79 \times 10^{-3}$ | ↓↓MMP1, ↓VEGFC                                                           |
| mevalonic acid | chemical - endogenous mammalian | $4.97 \times 10^{-3}$ | ↑CYP2B6, ↓↓LHCGR, ↓↓MMP1                                                 |
| PRKAG3         | kinase                          | $5.36 \times 10^{-3}$ | ↓IRX3, ↓MAP2K6, ↓↓SHISA2, ↓↓SLC2A1, ↑↑SLC7A2, ↓↓UGT1A9 (includes others) |
| ACVR1          | kinase                          | $5.37 \times 10^{-3}$ | ↑AUTS2, ↑↑DCN, ↑↑NOV                                                     |
| SUMO2          | enzyme                          | $5.37 \times 10^{-3}$ | ↓CAV1, ↓CAV2, ↑↑NOV                                                      |
| TCF3           | transcription regulator         | $5.58 \times 10^{-3}$ | ↓↓CTSV, ↑↑FOXO1, ↓↓LHCGR, ↑↑RORA, ↓SLC12A2, ↑TOX, ↓TYMS                  |
| NPPC           | other                           | $5.72 \times 10^{-3}$ | ↓↓GUCY1A3, ↓GUCY1B3                                                      |
| GPI            | enzyme                          | $6.71 \times 10^{-3}$ | ↓CAV1, ↓SKP2                                                             |
| ADAM10         | peptidase                       | $8.14 \times 10^{-3}$ | ↓↓DCLK1, ↓RABEP1, ↑↑RGS4, ↓↓TRIM9                                        |
| APOA1          | transporter                     | $8.18 \times 10^{-3}$ | ↓CAV1, ↓↓PTGIS, ↓↓SLC2A1                                                 |



|                                              |                                    |                                                                  |
|----------------------------------------------|------------------------------------|------------------------------------------------------------------|
| epoprostenol                                 | chemical - endogenous<br>mammalian | 8.92x10 <sup>-3</sup> ↓↓MMP1, ↓↓PTGIS                            |
| SBDS                                         | other                              | 9.22x10 <sup>-3</sup> ↑↑AKR1C1/AKR1C2, ↑↑COL14A1, ↓↓OPN3, ↑↑RGS4 |
| L-alpha-lysophosphatidylcholine, stearoyl    | chemical - endogenous<br>mammalian | 9.63x10 <sup>-3</sup> ↓HMGB1                                     |
| Integrin alpha V beta 3                      | complex                            | 9.63x10 <sup>-3</sup> ↓↓MMP1                                     |
| ADTRP                                        | other                              | 9.63x10 <sup>-3</sup> ↑↑TFPI                                     |
| LMF1                                         | other                              | 9.63x10 <sup>-3</sup> ↓CANX                                      |
| PCGF5                                        | other                              | 9.63x10 <sup>-3</sup> ↓↓MCC                                      |
| ATXN2                                        | other                              | 9.63x10 <sup>-3</sup> ↑↑PABPC1                                   |
| APBB3                                        | other                              | 9.63x10 <sup>-3</sup> ↓TYMS                                      |
| MED25                                        | other                              | 9.63x10 <sup>-3</sup> ↓↓MMP1                                     |
| NDP                                          | growth factor                      | 9.63x10 <sup>-3</sup> ↓↓ANGPT2                                   |
| GBP1                                         | enzyme                             | 9.63x10 <sup>-3</sup> ↓↓MMP1                                     |
| CCL20                                        | cytokine                           | 9.63x10 <sup>-3</sup> ↓POSTN                                     |
| SCO2                                         | other                              | 9.63x10 <sup>-3</sup> ↓↓COX4I1                                   |
| SPTBN4                                       | other                              | 9.63x10 <sup>-3</sup> ↑↑ANK3                                     |
| MYT1L                                        | transcription regulator            | 9.63x10 <sup>-3</sup> ↑RBFOX1                                    |
| B4GALNT2                                     | enzyme                             | 9.63x10 <sup>-3</sup> ↑↑VWF                                      |
| ARR3                                         | other                              | 9.63x10 <sup>-3</sup> ↓↓LHCGR                                    |
| CDK3                                         | kinase                             | 9.63x10 <sup>-3</sup> ↓TYMS                                      |
| Mvk                                          | kinase                             | 9.63x10 <sup>-3</sup> ↓↓LHCGR                                    |
| S100A2                                       | other                              | 9.63x10 <sup>-3</sup> ↓↓BNIP3                                    |
| TNFAIP8                                      | other                              | 9.63x10 <sup>-3</sup> ↓↓MMP1                                     |
| SMARCD1                                      | transcription regulator            | 9.63x10 <sup>-3</sup> ↓↓MMP1                                     |
| CGB (includes others)                        | other                              | 1.01x10 <sup>-2</sup> ↓↓LHCGR, ↓↓TNFAIP6                         |
| GNAS                                         | enzyme                             | 1.01x10 <sup>-2</sup> ↓↓CYP19A1, ↓↓LHCGR                         |
| KISS1R                                       | G-protein coupled receptor         | 1.01x10 <sup>-2</sup> ↓↓LHCGR, ↑TMEM144                          |
| BMP6                                         | growth factor                      | 1.04x10 <sup>-2</sup> ↑↑ADAMTS1, ↓↓SAP30, ↑↑SLC20A1, ↓ZEB1       |
| KLF2                                         | transcription regulator            | 1.06x10 <sup>-2</sup> ↓↓ANGPT2, ↓↓PTGIS, ↓↓SLC2A1, ↑↑TFPI, ↑↑VWF |
| miR-141-3p (and other miRNAs w/seed AACACUG) | mature microRNA                    | 1.14x10 <sup>-2</sup> ↑↑AKR1C1/AKR1C2, ↓ZEB1                     |
| CEACAM1                                      | other                              | 1.14x10 <sup>-2</sup> ↓↓ANGPT2, ↓VEGFC                           |
| MTM1                                         | phosphatase                        | 1.28x10 <sup>-2</sup> ↓↓BNIP3, ↓↓CTSV                            |

|                                              |                                   |                                                                |
|----------------------------------------------|-----------------------------------|----------------------------------------------------------------|
| ITGA2                                        | transmembrane receptor            | 1.28×10 <sup>-2</sup> ↑↑DCN, ↓↓MMP1                            |
| ADRB1                                        | G-protein coupled receptor        | 1.28×10 <sup>-2</sup> ↑↑ANXA4, ↓↓RYR2                          |
| FSHR                                         | G-protein coupled receptor        | 1.31×10 <sup>-2</sup> ↑ACPP, ↓↓CYP19A1, ↓↓LHCGR                |
| miR-29b-3p (and other miRNAs w/seed AGCACCA) | mature microRNA                   | 1.31×10 <sup>-2</sup> ↓CAV2, ↑COL4A2, ↓↓TRIM9                  |
| SNAI1                                        | transcription regulator           | 1.31×10 <sup>-2</sup> ↓↓CYP19A1, ↑↑HPGD, ↓ZEB1                 |
| RORC                                         | ligand-dependent nuclear receptor | 1.37×10 <sup>-2</sup> ↓BHMT, ↑CYP2B6, ↑↑HPGD, ↑↑RORA, ↑↑SLC7A2 |
| IGF2BP1                                      | translation regulator             | 1.42×10 <sup>-2</sup> ↑↑COL14A1, ↓↓COL5A1                      |
| FBN1                                         | other                             | 1.42×10 <sup>-2</sup> ↑COL4A2, ↓↓MMP1                          |
| GABPB1                                       | transcription regulator           | 1.42×10 <sup>-2</sup> ↓↓COX4I1, ↓SKP2                          |
| NFKBIB                                       | transcription regulator           | 1.45×10 <sup>-2</sup> ↓↓CTSV, ↓↓DAPK1, ↓SMAD7                  |
| MAP3K1                                       | kinase                            | 1.52×10 <sup>-2</sup> ↑↑NOV, ↑↑RGS4, ↓↓RGS7                    |
| ELOVL5                                       | enzyme                            | 1.56×10 <sup>-2</sup> ↑↑FOXO1, ↓INSIG2                         |
| GATA6                                        | transcription regulator           | 1.60×10 <sup>-2</sup> ↓CAV1, ↓↓CYP19A1, ↓↓LHCGR                |
| hemin                                        | chemical - endogenous mammalian   | 1.60×10 <sup>-2</sup> ↑↑AKR1C1/AKR1C2, ↓↓GUCY1A3, ↓GUCY1B3     |
| PIK3R1                                       | kinase                            | 1.68×10 <sup>-2</sup> ↑↑FOXO1, ↓↓SLC2A1, ↓VEGFC                |
| NAMPT                                        | cytokine                          | 1.72×10 <sup>-2</sup> ↓↓MMP1, ↑↑TFPI                           |
| FASN                                         | enzyme                            | 1.72×10 <sup>-2</sup> ↑↑FOXO1, ↓SKP2                           |
| Gh                                           | cytokine                          | 1.84×10 <sup>-2</sup> ↑CYP2B6, ↓↓SLC2A1, ↑TOX                  |
| FAM3B                                        | cytokine                          | 1.88×10 <sup>-2</sup> ↓CAV1, ↑↑DCN                             |
| LTBP1                                        | other                             | 1.88×10 <sup>-2</sup> ↓SMAD7, ↑↑VWF                            |
| CASR                                         | G-protein coupled receptor        | 1.88×10 <sup>-2</sup> ↑CYP2B6, ↓TYMS                           |
| glucose oxidase                              | group                             | 1.92×10 <sup>-2</sup> ↓↓SLC2A1                                 |
| Gα12/13                                      | group                             | 1.92×10 <sup>-2</sup> ↓↓MMP1                                   |
| APBB2                                        | other                             | 1.92×10 <sup>-2</sup> ↓TYMS                                    |
| TOX4                                         | other                             | 1.92×10 <sup>-2</sup> ↓ZEB1                                    |
| GFRA1                                        | transmembrane receptor            | 1.92×10 <sup>-2</sup> ↑ACPP                                    |
| CCNC                                         | other                             | 1.92×10 <sup>-2</sup> ↓TYMS                                    |
| LAMA3                                        | other                             | 1.92×10 <sup>-2</sup> ↓↓MMP1                                   |
| PPP1R3C                                      | phosphatase                       | 1.92×10 <sup>-2</sup> ↓↓SLC2A1                                 |
| UTS2                                         | other                             | 1.92×10 <sup>-2</sup> ↑↑HPGD                                   |

|                                                               |                                   |                                                                                                 |
|---------------------------------------------------------------|-----------------------------------|-------------------------------------------------------------------------------------------------|
| VRK1                                                          | kinase                            | 1.92x10 <sup>-2</sup> ↓↓MMP1                                                                    |
| ZNF410                                                        | other                             | 1.92x10 <sup>-2</sup> ↓↓MMP1                                                                    |
| ATP9A                                                         | other                             | 1.92x10 <sup>-2</sup> ↓VEGFC                                                                    |
| FKBP1B                                                        | enzyme                            | 1.92x10 <sup>-2</sup> ↓↓RYR2                                                                    |
| DUSP2                                                         | phosphatase                       | 1.92x10 <sup>-2</sup> ↓↓MMP1                                                                    |
| PNRC1                                                         | other                             | 1.92x10 <sup>-2</sup> ↓↓CYP19A1                                                                 |
| NR2F6                                                         | ligand-dependent nuclear receptor | 1.92x10 <sup>-2</sup> ↓↓LHCGR                                                                   |
| 4-[(4'-chloro-2'-fluoro)phenylamino]-6,7-dimethoxyquinazoline | chemical - kinase inhibitor       | 1.92x10 <sup>-2</sup> ↓↓ANGPT2                                                                  |
| SOX2-OCT4-NANOG                                               | complex                           | 2.04x10 <sup>-2</sup> ↑↑KAT6A, ↓↓RIF1                                                           |
| TWIST2                                                        | transcription regulator           | 2.04x10 <sup>-2</sup> ↓POSTN, ↓ZEB1                                                             |
| ITGA1                                                         | other                             | 2.04x10 <sup>-2</sup> ↓CAV1, ↑↑DCN                                                              |
| PROX1                                                         | transcription regulator           | 2.04x10 <sup>-2</sup> ↓↓ANGPT2, ↑↑RGS4                                                          |
| SHH                                                           | peptidase                         | 2.10x10 <sup>-2</sup> ↑↑ADAMTS1, ↓↓ANGPT2, ↑↑BMPR1B, ↓CAV1, ↓TYMS                               |
| TWIST1                                                        | transcription regulator           | 2.10x10 <sup>-2</sup> ↑↑DCN, ↑↑FOXO1, ↓ZEB1                                                     |
| TBX5                                                          | transcription regulator           | 2.10x10 <sup>-2</sup> ↓↓ACTN2, ↓POSTN, ↓↓RYR2                                                   |
| AREG/AREGB                                                    | growth factor                     | 2.22x10 <sup>-2</sup> ↓↓MMP1, ↓↓TNFAIP6                                                         |
| TRIB3                                                         | kinase                            | 2.22x10 <sup>-2</sup> ↓↓DDIT4, ↓↓STC2                                                           |
| NFIC                                                          | transcription regulator           | 2.22x10 <sup>-2</sup> ↓HMGB1, ↓↓LHCGR                                                           |
| JUND                                                          | transcription regulator           | 2.29x10 <sup>-2</sup> ↓↓CYP19A1, ↓↓LHCGR, ↓↓MMP1                                                |
| FOXA1                                                         | transcription regulator           | 2.32x10 <sup>-2</sup> ↓ELK3, ↓↓LHFP, ↑↑RORA, ↓SLC12A2                                           |
| FAS                                                           | transmembrane receptor            | 2.34x10 <sup>-2</sup> ↑COL4A2, ↓↓COL5A1, ↑↑FOXO1, ↑↑INPP4A, ↑↑MAP4K4, ↓↓MMP1, ↑↑PKN2, ↓↓TNFAIP6 |
| Notch                                                         | group                             | 2.39x10 <sup>-2</sup> ↓↓GUCY1A3, ↓GUCY1B3, ↓ZEB1                                                |
| Smad                                                          | complex                           | 2.39x10 <sup>-2</sup> ↓EGLN1, ↓SMAD7                                                            |
| NR1D1                                                         | ligand-dependent nuclear receptor | 2.39x10 <sup>-2</sup> ↓↓BNIP3, ↓↓CTSV                                                           |
| SAA                                                           | group                             | 2.58x10 <sup>-2</sup> ↓↓MMP1, ↑↑TFPI                                                            |
| AMH                                                           | growth factor                     | 2.58x10 <sup>-2</sup> ↓↓CYP19A1, ↓↓LHCGR                                                        |
| CR1L                                                          | other                             | 2.58x10 <sup>-2</sup> ↑COL4A2, ↓↓COL5A1                                                         |
| CCR1                                                          | G-protein coupled receptor        | 2.58x10 <sup>-2</sup> ↓↓CTSV, ↑↑TNFRSF11A                                                       |
| ATF4                                                          | transcription regulator           | 2.67x10 <sup>-2</sup> ↓BCAT1, ↓↓DDIT4, ↓↓STC2, ↑↑TNFRSF11A                                      |
| POU2F1                                                        | transcription regulator           | 2.74x10 <sup>-2</sup> ↑CYP2B6, ↓↓DDIT4, ↓ELK3, ↑↑VWF                                            |

|                                                         |                                 |                                                               |
|---------------------------------------------------------|---------------------------------|---------------------------------------------------------------|
| kynurenine                                              | chemical - endogenous mammalian | 2.86x10 <sup>-2</sup> ↓↓MMP1                                  |
| Beta Arrestin                                           | group                           | 2.86x10 <sup>-2</sup> ↓↓LHCGR                                 |
| RNF31                                                   | enzyme                          | 2.86x10 <sup>-2</sup> ↓↓CYP19A1                               |
| CHD5                                                    | enzyme                          | 2.86x10 <sup>-2</sup> ↓ZEB1                                   |
| EPM2A                                                   | phosphatase                     | 2.86x10 <sup>-2</sup> ↓↓SLC2A1                                |
| CACNA1D                                                 | ion channel                     | 2.86x10 <sup>-2</sup> ↓↓RYR2                                  |
| Hspg                                                    | group                           | 2.86x10 <sup>-2</sup> ↓↓MMP1                                  |
| WISP1                                                   | other                           | 2.86x10 <sup>-2</sup> ↓↓MMP1                                  |
| EMP2                                                    | other                           | 2.86x10 <sup>-2</sup> ↓CAV1                                   |
| PTPRA                                                   | phosphatase                     | 2.86x10 <sup>-2</sup> ↓↓ENO2                                  |
| mir-96                                                  | microRNA                        | 2.86x10 <sup>-2</sup> ↑↑FOXO1                                 |
| SDHA                                                    | enzyme                          | 2.86x10 <sup>-2</sup> ↓↓SLC2A1                                |
| SDC4                                                    | other                           | 2.86x10 <sup>-2</sup> ↓↓ANGPT2                                |
| PPP1R13L                                                | transcription regulator         | 2.86x10 <sup>-2</sup> ↓↓SLC2A1                                |
| CCL25                                                   | cytokine                        | 2.86x10 <sup>-2</sup> ↓↓MMP1                                  |
| HTR6                                                    | G-protein coupled receptor      | 2.86x10 <sup>-2</sup> ↓↓DYNC11I                               |
| CTSK                                                    | peptidase                       | 2.86x10 <sup>-2</sup> ↓↓CTSV                                  |
| MLF1                                                    | other                           | 2.86x10 <sup>-2</sup> ↓SKP2                                   |
| CD99                                                    | other                           | 2.86x10 <sup>-2</sup> ↓CAV1                                   |
| HES6                                                    | transcription regulator         | 2.86x10 <sup>-2</sup> ↓↓MMP1                                  |
| GPX4                                                    | enzyme                          | 2.86x10 <sup>-2</sup> ↓↓MMP1                                  |
| CBFA2T3                                                 | transcription regulator         | 2.86x10 <sup>-2</sup> ↓PFKFB4                                 |
| SERPINH1                                                | other                           | 2.86x10 <sup>-2</sup> ↑COL4A2                                 |
| myristoylated PKCzeta pseudosubstrate peptide inhibitor | chemical - kinase inhibitor     | 2.86x10 <sup>-2</sup> ↓↓LHCGR                                 |
| (Ala9)-autocamtide-2                                    | chemical - kinase inhibitor     | 2.86x10 <sup>-2</sup> ↓↓MMP1                                  |
| SPDEF                                                   | transcription regulator         | 2.90x10 <sup>-2</sup> ↑COL4A2, ↓↓COL5A1, ↓ZEB1                |
| PRKG1                                                   | kinase                          | 2.96x10 <sup>-2</sup> ↓↓GUCY1A3, ↓GUCY1B3                     |
| ABL1                                                    | kinase                          | 2.96x10 <sup>-2</sup> ↓CAV1, ↓↓MMP1                           |
| PAK1                                                    | kinase                          | 2.96x10 <sup>-2</sup> ↓↓CYP19A1, ↑↑TFPI                       |
| LIPE                                                    | enzyme                          | 2.97x10 <sup>-2</sup> ↓H3F3A/H3F3B, ↓POSTN, ↓SMAD7, ↓↓ST3GAL5 |
| TNFRSF1B                                                | transmembrane receptor          | 3.01x10 <sup>-2</sup> ↓↓ANGPT2, ↓↓MMP1, ↑↑TNFRSF11A           |
| TCOF1                                                   | transporter                     | 3.12x10 <sup>-2</sup> ↓ASAP1, ↓↓BNIP3, ↓↓SLC2A1               |

|             |                                 |                                                                       |
|-------------|---------------------------------|-----------------------------------------------------------------------|
| HISTONE     | group                           | $3.16 \times 10^{-2}$ ↑↑HPGD, ↓↓PTGIS                                 |
| ETV4        | transcription regulator         | $3.16 \times 10^{-2}$ ↓CAV1, ↑↑HPGD                                   |
| AGTR2       | G-protein coupled receptor      | $3.16 \times 10^{-2}$ ↓↓ANGPT2, ↓ZEB1                                 |
| S100A6      | transporter                     | $3.16 \times 10^{-2}$ ↑↑ADAMTS1, ↓TYMS                                |
| PRKD1       | kinase                          | $3.16 \times 10^{-2}$ ↓AJUBA, ↓↓MMP1                                  |
| IDH1        | enzyme                          | $3.36 \times 10^{-2}$ ↓↓SLC2A1, ↓ZEB1                                 |
| NPPB        | other                           | $3.36 \times 10^{-2}$ ↓↓CYP19A1, ↓SMAD7                               |
| GAB2        | other                           | $3.57 \times 10^{-2}$ ↓SMAD7, ↓ZEB1                                   |
| PTGER2      | G-protein coupled receptor      | $3.57 \times 10^{-2}$ ↓↓CYP19A1, ↓↓TNFAIP6                            |
| PLG         | peptidase                       | $3.57 \times 10^{-2}$ ↓CAV1, ↓↓MMP1                                   |
| GNAQ        | enzyme                          | $3.57 \times 10^{-2}$ ↑↑ADAMTS1, ↓↓CTSV                               |
| RB1         | transcription regulator         | $3.74 \times 10^{-2}$ ↓↓ANGPT2, ↓↓BNIP3, ↓CDCA7L, ↓SKP2, ↓TYMS, ↓ZEB1 |
| ACVRL1      | kinase                          | $3.79 \times 10^{-2}$ ↓↓ANGPT2, ↓SMAD7                                |
| UXT         | other                           | $3.79 \times 10^{-2}$ ↓↓ENO2, ↑↑HPGD                                  |
| FEZF1       | other                           | $3.80 \times 10^{-2}$ ↓↓MMP1                                          |
| GJB6        | transporter                     | $3.80 \times 10^{-2}$ ↓BHMT                                           |
| VLDL        | complex                         | $3.80 \times 10^{-2}$ ↓PON2                                           |
| LAMTOR5     | other                           | $3.80 \times 10^{-2}$ ↓SKP2                                           |
| ABL2        | kinase                          | $3.80 \times 10^{-2}$ ↓↓MMP1                                          |
| HIF1AN      | enzyme                          | $3.80 \times 10^{-2}$ ↓↓SLC2A1                                        |
| GNB5        | enzyme                          | $3.80 \times 10^{-2}$ ↓↓RGS7                                          |
| CUL3        | enzyme                          | $3.80 \times 10^{-2}$ ↓↓MMP1                                          |
| PODXL       | kinase                          | $3.80 \times 10^{-2}$ ↓↓MMP1                                          |
| PSIP1       | other                           | $3.80 \times 10^{-2}$ ↓VEGFC                                          |
| SULT1E1     | enzyme                          | $3.80 \times 10^{-2}$ ↓↓TNFAIP6                                       |
| PLAGL2      | transcription regulator         | $3.80 \times 10^{-2}$ ↓↓BNIP3                                         |
| AQP4        | transporter                     | $3.80 \times 10^{-2}$ ↓↓SLC2A1                                        |
| FIGF        | growth factor                   | $3.80 \times 10^{-2}$ ↓VEGFC                                          |
| BATF3       | transcription regulator         | $3.80 \times 10^{-2}$ ↓↓MMP1                                          |
| SSTR3       | G-protein coupled receptor      | $3.80 \times 10^{-2}$ ↓↓DYNC111                                       |
| RECK        | other                           | $3.80 \times 10^{-2}$ ↓SKP2                                           |
| methylamine | chemical - endogenous mammalian | $3.80 \times 10^{-2}$ ↓↓SLC2A1                                        |

|                                              |                                 |                                                            |
|----------------------------------------------|---------------------------------|------------------------------------------------------------|
| miR-182-5p (and other miRNAs w/seed UUGGCAA) | mature microRNA                 | 4.01×10 <sup>-2</sup> ↑↑FOXO1, ↑↑VWF                       |
| mir-182                                      | microRNA                        | 4.01×10 <sup>-2</sup> ↑↑FOXO1, ↑↑VWF                       |
| CEBPD                                        | transcription regulator         | 4.21×10 <sup>-2</sup> ↓↓CYP19A1, ↓↓TNFAIP6, ↓VEGFC         |
| WT1                                          | transcription regulator         | 4.56×10 <sup>-2</sup> ↓↓CTSV, ↓↓CYP19A1, ↓↓ENO2, ↑↑SLC20A1 |
| GDF2                                         | growth factor                   | 4.61×10 <sup>-2</sup> ↓CAV1, ↓POSTN, ↓SMAD7                |
| ARNT                                         | transcription regulator         | 4.61×10 <sup>-2</sup> ↓↓BNIP3, ↓CAV1, ↓↓SLC2A1             |
| ETS1                                         | transcription regulator         | 4.62×10 <sup>-2</sup> ↓CAV1, ↑↑HPGD, ↓↓MMP1, ↓TYMS, ↓ZEB1  |
| HNRNPA2B1                                    | other                           | 4.66×10 <sup>-2</sup> ↓↓CRIP1, ↓↓DCLK1, ↑↑KCTD12, ↓RIMKLB  |
| STAT                                         | group                           | 4.69×10 <sup>-2</sup> ↓↓MMP1, ↓SMAD7                       |
| IFNE                                         | cytokine                        | 4.69×10 <sup>-2</sup> ↓↓SLC2A1, ↑↑SLC7A2                   |
| phosphatidylinositol                         | chemical - endogenous mammalian | 4.72×10 <sup>-2</sup> ↓↓MMP1                               |
| lactosylceramide                             | chemical - endogenous mammalian | 4.72×10 <sup>-2</sup> ↑↑TNFRSF11A                          |
| alpha-estradiol                              | chemical - endogenous mammalian | 4.72×10 <sup>-2</sup> ↑CYP2B6                              |
| chondroitin sulfate E                        | chemical - endogenous mammalian | 4.72×10 <sup>-2</sup> ↑↑PRICKLE1                           |
| Erm                                          | group                           | 4.72×10 <sup>-2</sup> ↓CAV1                                |
| RNU7-1                                       | other                           | 4.72×10 <sup>-2</sup> ↓H3F3A/H3F3B                         |
| ZNF521                                       | other                           | 4.72×10 <sup>-2</sup> ↑↑TNFRSF11A                          |
| Proinsulin                                   | group                           | 4.72×10 <sup>-2</sup> ↑↑FOXO1                              |
| LGI1                                         | other                           | 4.72×10 <sup>-2</sup> ↓↓MMP1                               |
| RBBP4                                        | enzyme                          | 4.72×10 <sup>-2</sup> ↓↓LHCGR                              |
| CRK                                          | other                           | 4.72×10 <sup>-2</sup> ↓CAV1                                |
| CLDN1                                        | other                           | 4.72×10 <sup>-2</sup> ↓ZEB1                                |
| ZBTB46                                       | other                           | 4.72×10 <sup>-2</sup> ↓VEGFC                               |
| miR-192-5p (and other miRNAs w/seed UGACCUA) | mature microRNA                 | 4.72×10 <sup>-2</sup> ↓ZEB1                                |
| mir-183                                      | microRNA                        | 4.72×10 <sup>-2</sup> ↑↑FOXO1                              |
| ITIH2                                        | other                           | 4.72×10 <sup>-2</sup> ↓↓TNFAIP6                            |
| HSPA2                                        | other                           | 4.72×10 <sup>-2</sup> ↑↑AKAP4                              |
| CDH4                                         | other                           | 4.72×10 <sup>-2</sup> ↓↓MMP1                               |
| MYCT1                                        | other                           | 4.72×10 <sup>-2</sup> ↓EGLN1                               |

|                        |                                    |                                           |
|------------------------|------------------------------------|-------------------------------------------|
| SLC9A1                 | ion channel                        | $4.72 \times 10^{-2}$ ↓SLC12A2            |
| BMX                    | kinase                             | $4.72 \times 10^{-2}$ ↓↓ENO2              |
| YWHAE                  | other                              | $4.72 \times 10^{-2}$ ↓↓MMP1              |
| CDC27                  | other                              | $4.72 \times 10^{-2}$ ↓SKP2               |
| ELN                    | other                              | $4.72 \times 10^{-2}$ ↓↓MMP1              |
| PLAA                   | other                              | $4.72 \times 10^{-2}$ ↑↑ANXA4             |
| ACTN4                  | other                              | $4.72 \times 10^{-2}$ ↓↓MMP1              |
| SIAH1                  | enzyme                             | $4.72 \times 10^{-2}$ ↓SMAD7              |
| alpha-hydroxyglutarate | chemical - endogenous<br>mammalian | $4.72 \times 10^{-2}$ ↓ZEB1               |
| starch                 | chemical - endogenous<br>mammalian | $4.72 \times 10^{-2}$ ↓↓ATP2B1            |
| lactose                | chemical - endogenous<br>mammalian | $4.72 \times 10^{-2}$ ↓↓MMP1              |
| FOXM1                  | transcription regulator            | $4.89 \times 10^{-2}$ ↓CAV1, ↓SKP2, ↓ZEB1 |

---

Symbols for regulators with increased (or decreased) expression and fold-change $\geq 2$  are preceded with ↑↑ (or ↓↓). Symbols for genes with increased (or decreased) expression and fold-change $< 2$  are preceded with ↑ (or ↓).

---
